# Supplementary material for: 3,6,13,16-Tetraalkylporphycenes: synthesis and exploration of the effect of alkyl groups on the structure, photophysical properties, and basicity
Source: Royal Society of Chemistry journal article supplement (doi:10.1039/d2nj01550a), 2022-01-01
Supplement: d2nj01550a1.pdf [file d2nj01550a1.pdf]

## ELECTRONIC SUPPLEMENTARY INFORMATION

### **3,6,13,16-Tetraalkylporphycenes: Synthesis and Exploration of Effect of Alkyl Groups on Structure, Photophysical Properties, and Basicity**

Jodukathula Nagamaiah, Arnab Dutta, Sipra Sucharita Sahoo, Sameeta Sahoo and Pradeepta K. Panda\*

School of Chemistry, University of Hyderabad, Hyderabad- 500046, India

E-mail: [pradeepta.panda@uohyd.ac.in](mailto:pradeepta.panda@uohyd.ac.in) ; [pkpsc@uohyd.ernet.in](mailto:pkpsc@uohyd.ernet.in)

#### **Contents:**

|                                                               |     |
|---------------------------------------------------------------|-----|
| 1. DETAILED SYNTHETIC PROCEDURE.....                          | S2  |
| 2. NMR SPECTRA AND HRMS FOR COMPOUNDS.....                    | S3  |
| 3. CRYSTALLOGRAPHIC DATA .....                                | S51 |
| 4. PHOTOPHYSICAL DATA: .....                                  | S56 |
| 5. FLUORESCENCE DECAY PROFILES OF TETRAALKYLPORPHYCENES ..... | S66 |
| 6. SINGLET OXYGEN LUMINESCENCE SPECTRAL DATA.....             | S67 |
| 7. CYCLIC VOLTAMMOGRAMS .....                                 | S68 |

# 1. EXPERIMENTAL SECTION

## 2. General Procedure for synthesis of 1:

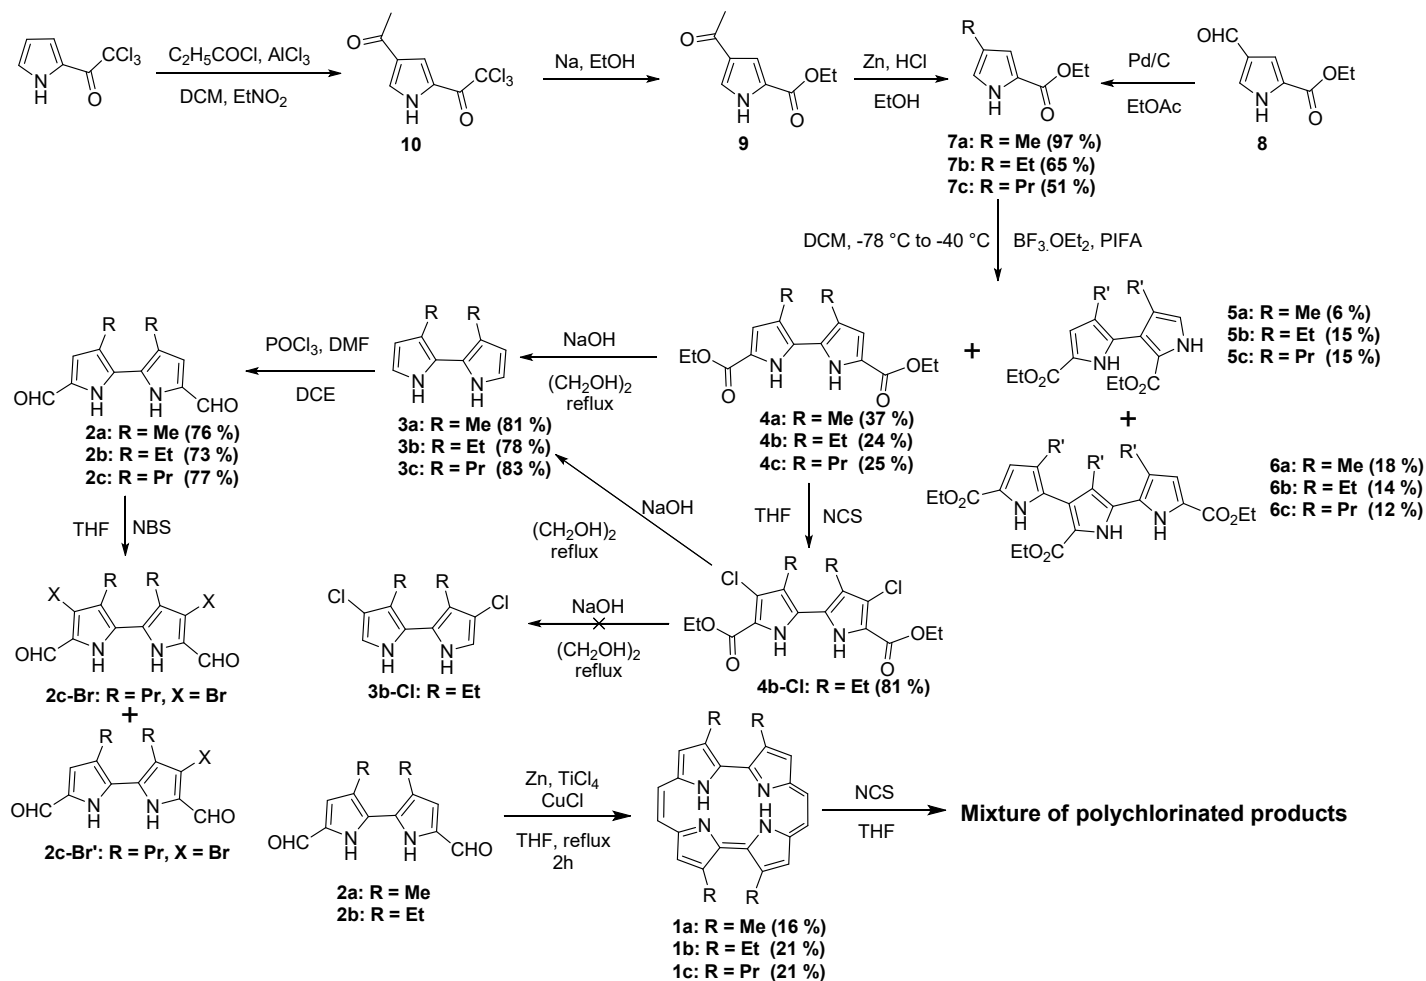

### 3. NMR Spectra and HRMS data for compounds:

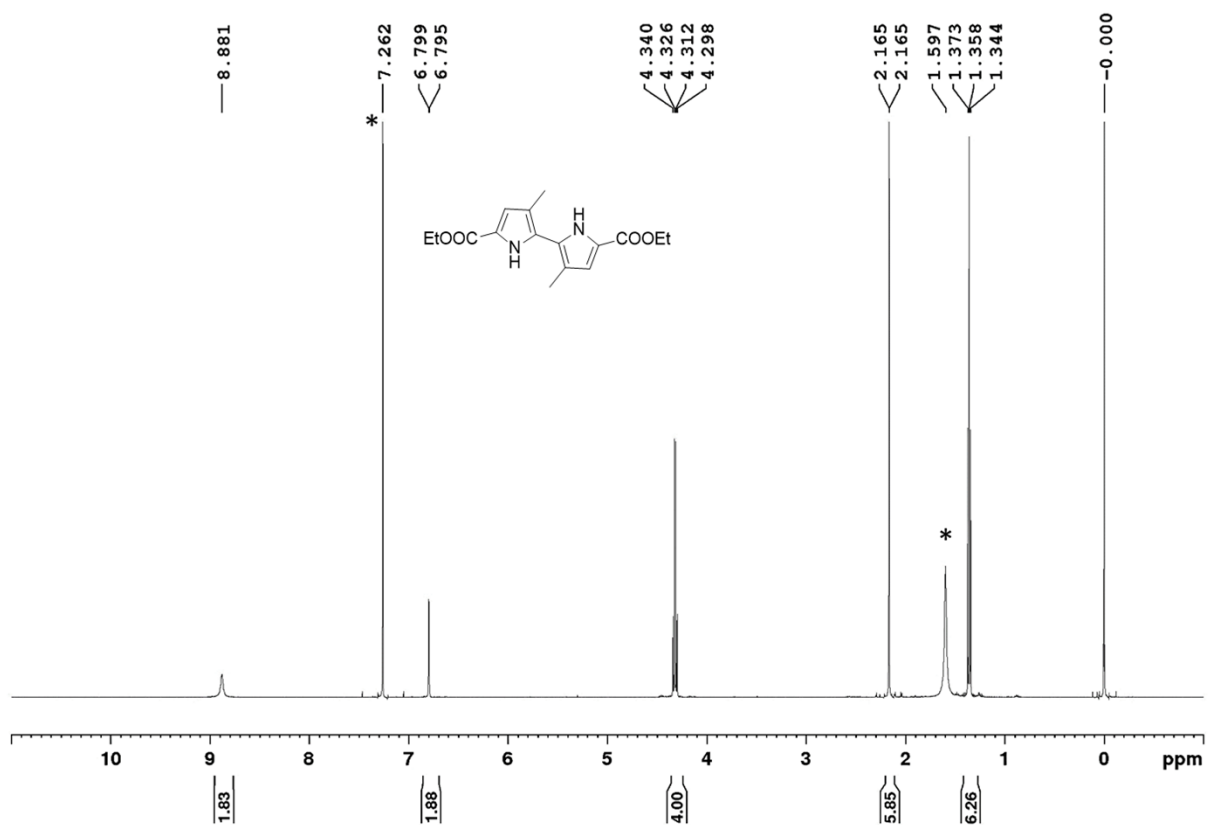

**Figure S1.** <sup>1</sup>H NMR spectrum of the compound **4a** (500 MHz, CDCl<sub>3</sub>, TMS, δ = 0 ppm). \* Residual solvent peak: CDCl<sub>3</sub>, H<sub>2</sub>O.

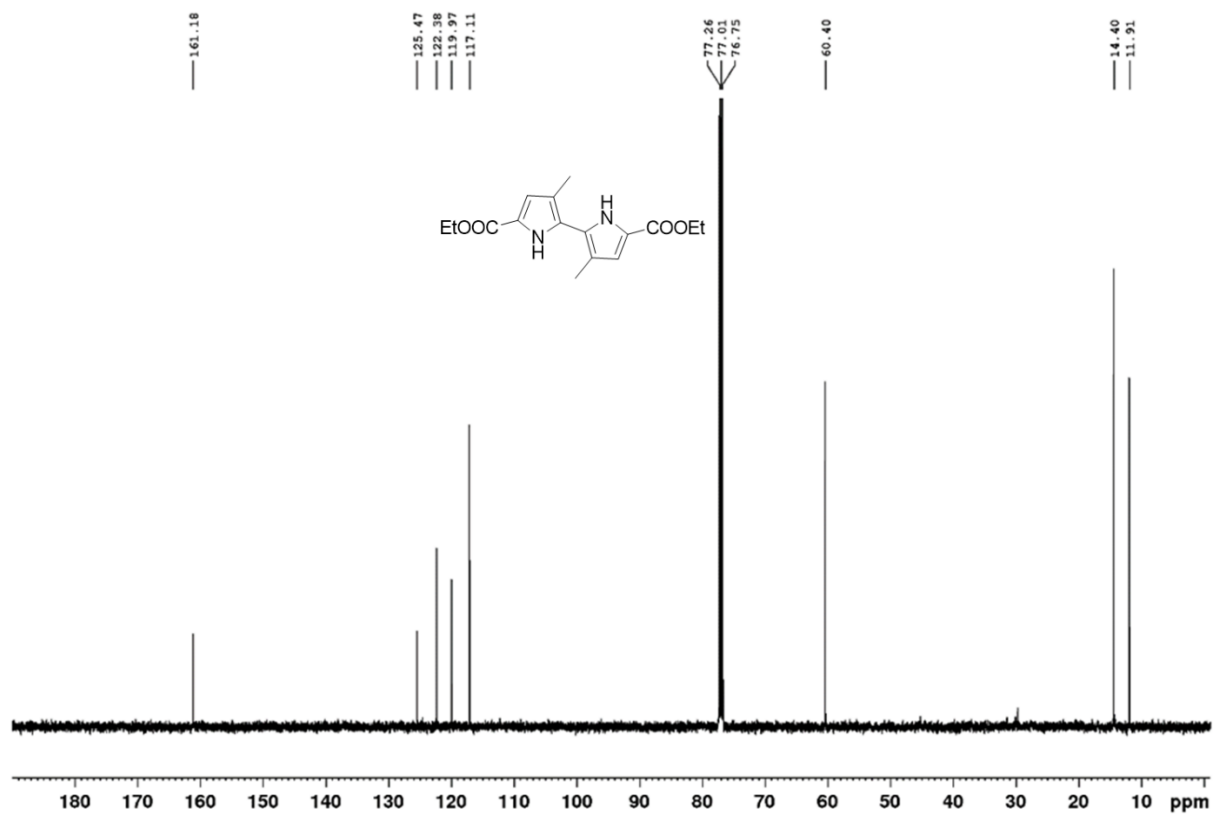

**Figure S2.**  $^{13}\text{C}$  NMR spectrum of the compound **4a** (126 MHz,  $\text{CDCl}_3$  ( $\delta = 77$  ppm)).

JN-1-87-1

UNIVERSITY OF HYDERABAD  
ACRHEM  
XEVO-G2XSQTOF#YEA1155

09-Jul-2021  
15:14:21

09072021\_27 +VE 19 (0.219) AM2 (Ar,20000.0,556.28,0.00,LS 10); Cm (19:30-66:108)

1: TOF MS ES+  
3.99e7

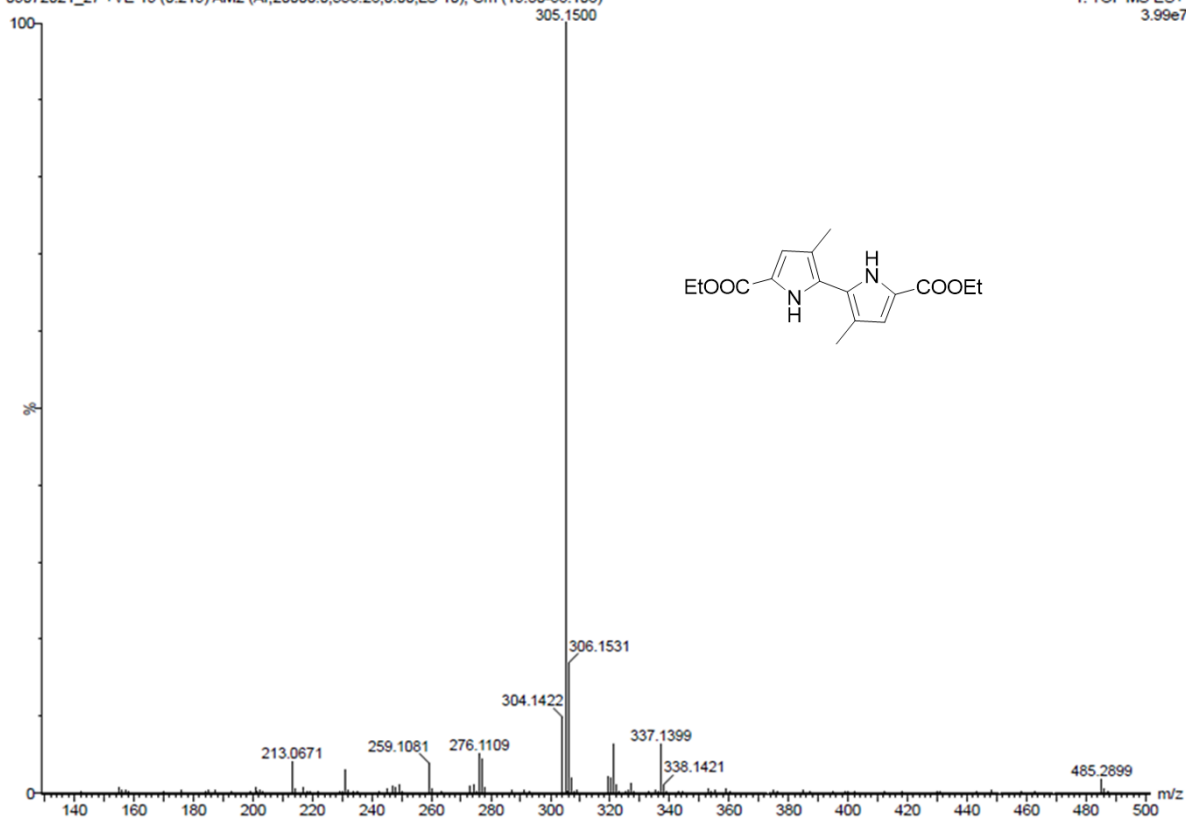

**Figure S3.** HRMS data of **4a**:  $[M+H]^+$  Calcd for  $C_{16}H_{21}N_2O_4$ : 305.1501; found: 305.1500.

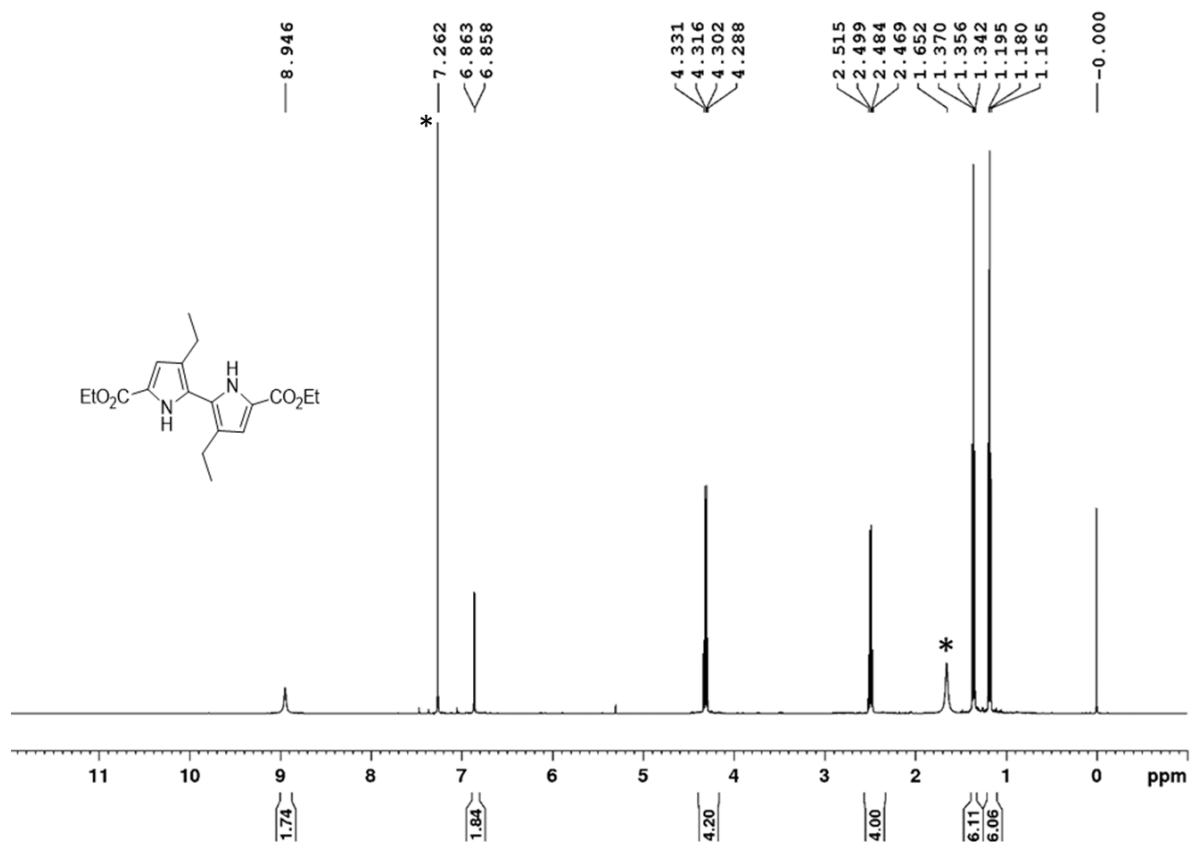

**Figure S4.**  $^1\text{H}$  NMR spectrum of the compound **4b** (500 MHz,  $\text{CDCl}_3$  (TMS,  $\delta = 0$  ppm)). \* Residual solvent peak:  $\text{CDCl}_3$ ,  $\text{H}_2\text{O}$ .

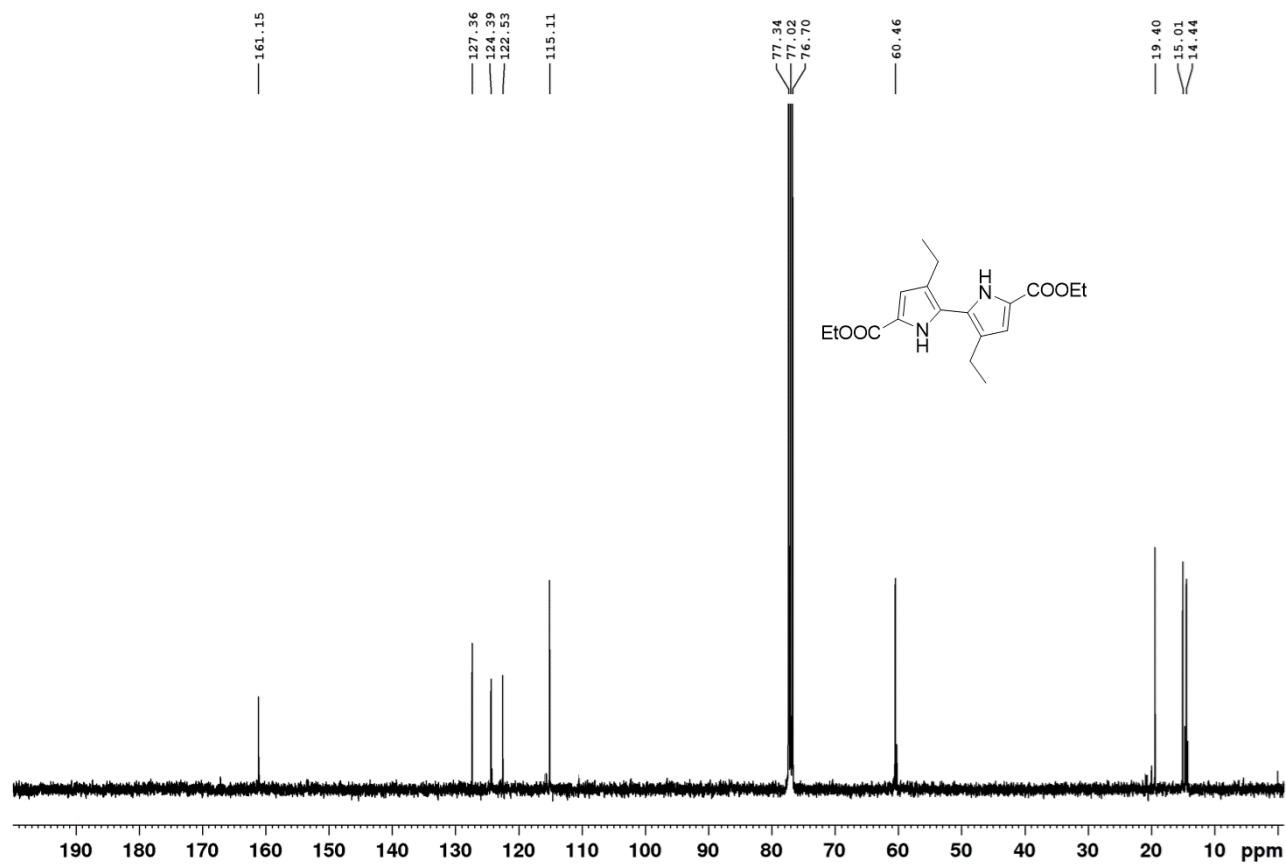

**Figure S5.**  $^{13}\text{C}$  NMR spectrum of the compound **4b** (126 MHz,  $\text{CDCl}_3$  ( $\delta = 77$  ppm)).

## Display Report

### Analysis Info

Analysis Name D:\Data\2019\PROF.PKPMARCH\JN-AD-BPY-2ND.d  
Method tune\_low.m  
Sample Name JN-AD-BPY-2ND-MEOH  
Comment

Acquisition Date 3/5/2019 11:02:58 AM

Operator UOH-Chemistry  
Instrument maXis 10138

### Acquisition Parameter

|             |            |                       |           |                  |           |
|-------------|------------|-----------------------|-----------|------------------|-----------|
| Source Type | ESI        | Ion Polarity          | Positive  | Set Nebulizer    | 0.4 Bar   |
| Focus       | Not active | Set Capillary         | 3400 V    | Set Dry Heater   | 200 °C    |
| Scan Begin  | 50 m/z     | Set End Plate Offset  | -500 V    | Set Dry Gas      | 4.0 l/min |
| Scan End    | 1800 m/z   | Set Collision Cell RF | 350.0 Vpp | Set Divert Valve | Waste     |

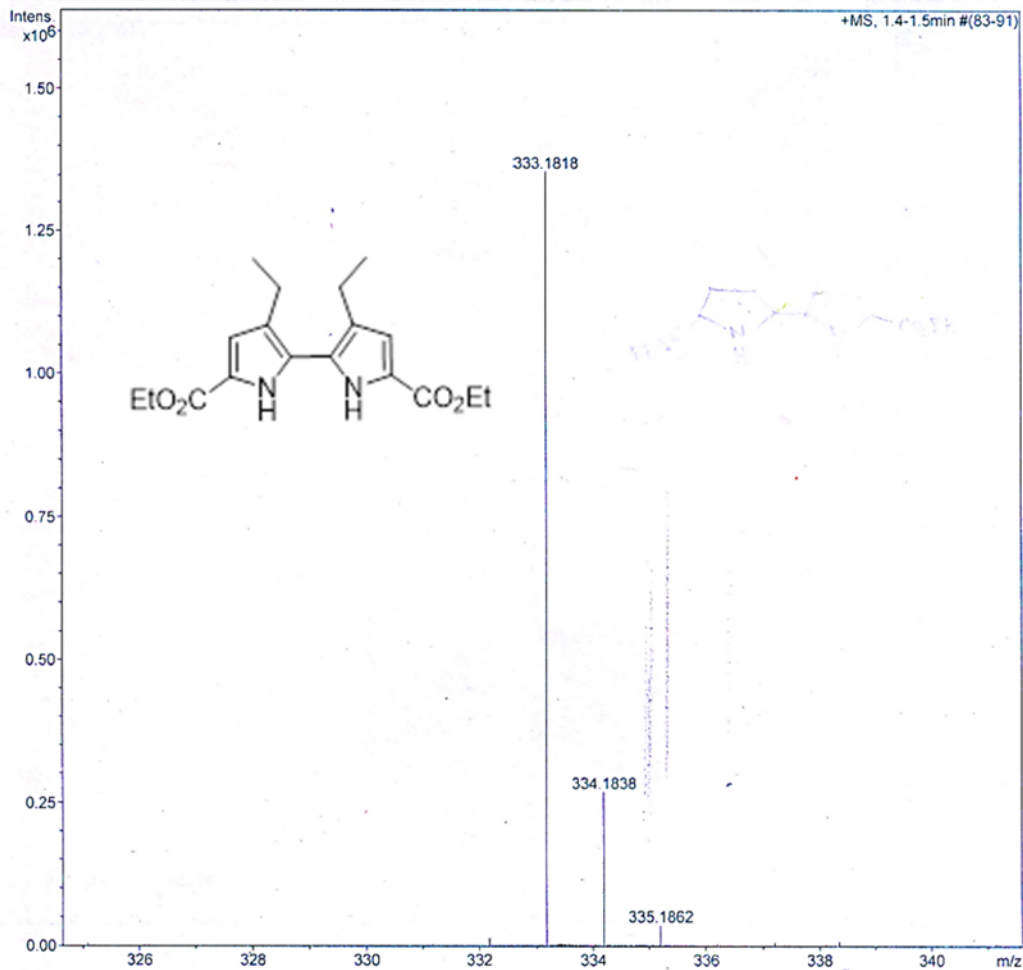

Bruker Compass DataAnalysis 4.0

printed: 3/5/2019 11:09:54 AM

Page 1 of 1

**Figure S6.** HRMS data of **4b**:  $[M+H]^+$  Calcd for  $C_{18}H_{25}N_2O_4$ : 333.1814; found: 333.1818.



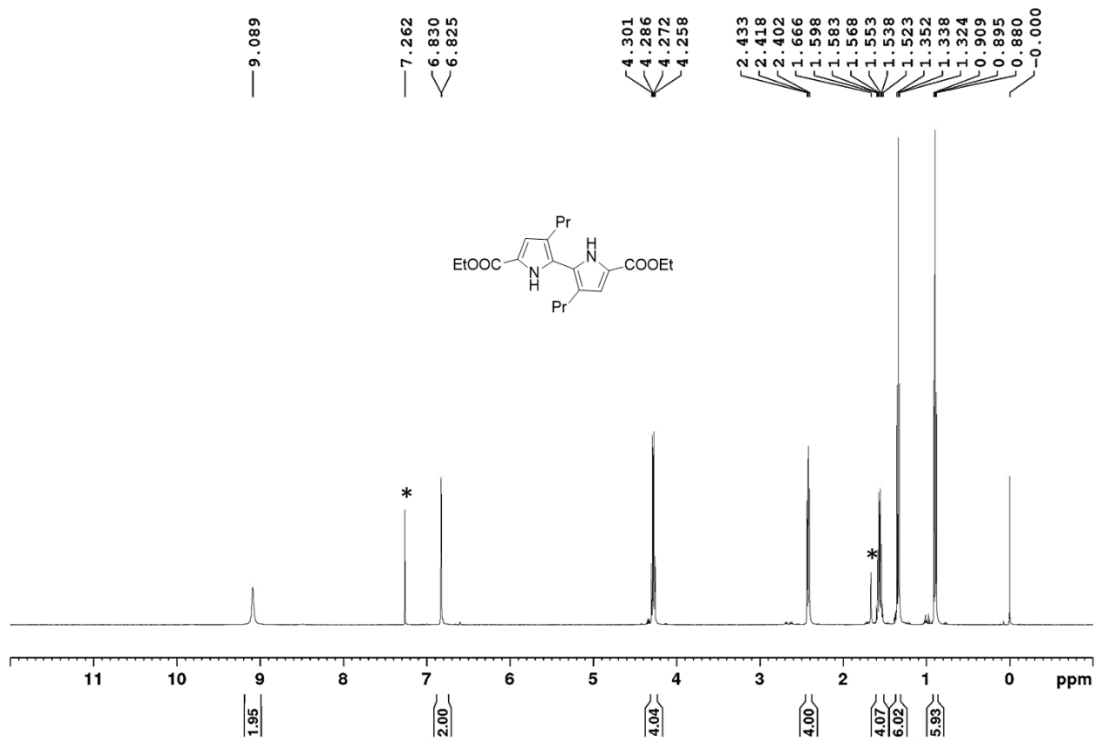

**Figure S7.**  $^1\text{H}$  NMR spectrum of the compound **4c** (500 MHz,  $\text{CDCl}_3$  TMS,  $\delta = 0$  ppm). \* residual solvent peak:  $\text{CDCl}_3$ ,  $\text{H}_2\text{O}$ .

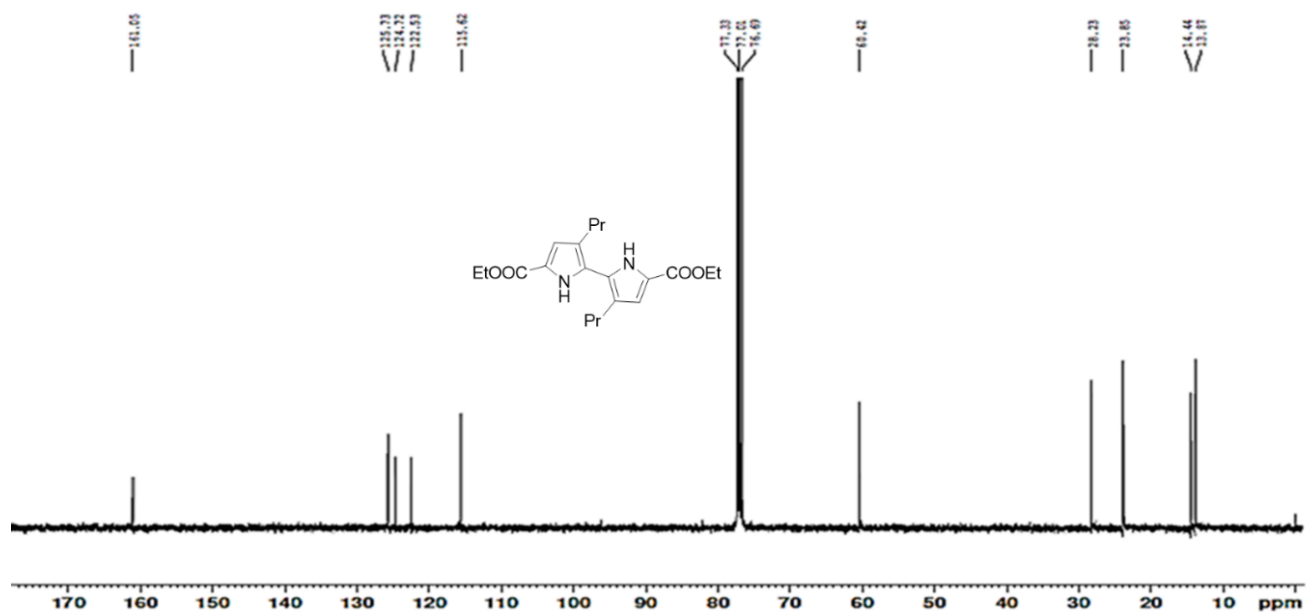

**Figure S8.**  $^{13}\text{C}$  NMR spectrum of the compound **4c** (126 MHz,  $\text{CDCl}_3$  ( $\delta = 77$  ppm)).

## Display Report

### Analysis Info

Analysis Name D:\Data\2019\PROF.PKP\JULYAD-BPY-DIEST-R.d  
Method tune\_low\_Pos.m  
Sample Name AD-BPY-DIEST-DCM-MEOH  
Comment

Acquisition Date 7/3/2019 12:29:16 PM

Operator UOH-Chemistry  
Instrument maXis 10138

### Acquisition Parameter

|             |            |                       |           |                  |           |
|-------------|------------|-----------------------|-----------|------------------|-----------|
| Source Type | ESI        | Ion Polarity          | Positive  | Set Nebulizer    | 0.3 Bar   |
| Focus       | Not active | Set Capillary         | 4200 V    | Set Dry Heater   | 180 °C    |
| Scan Begin  | 50 m/z     | Set End Plate Offset  | -500 V    | Set Dry Gas      | 6.0 l/min |
| Scan End    | 1500 m/z   | Set Collision Cell RF | 350.0 Vpp | Set Divert Valve | Waste     |

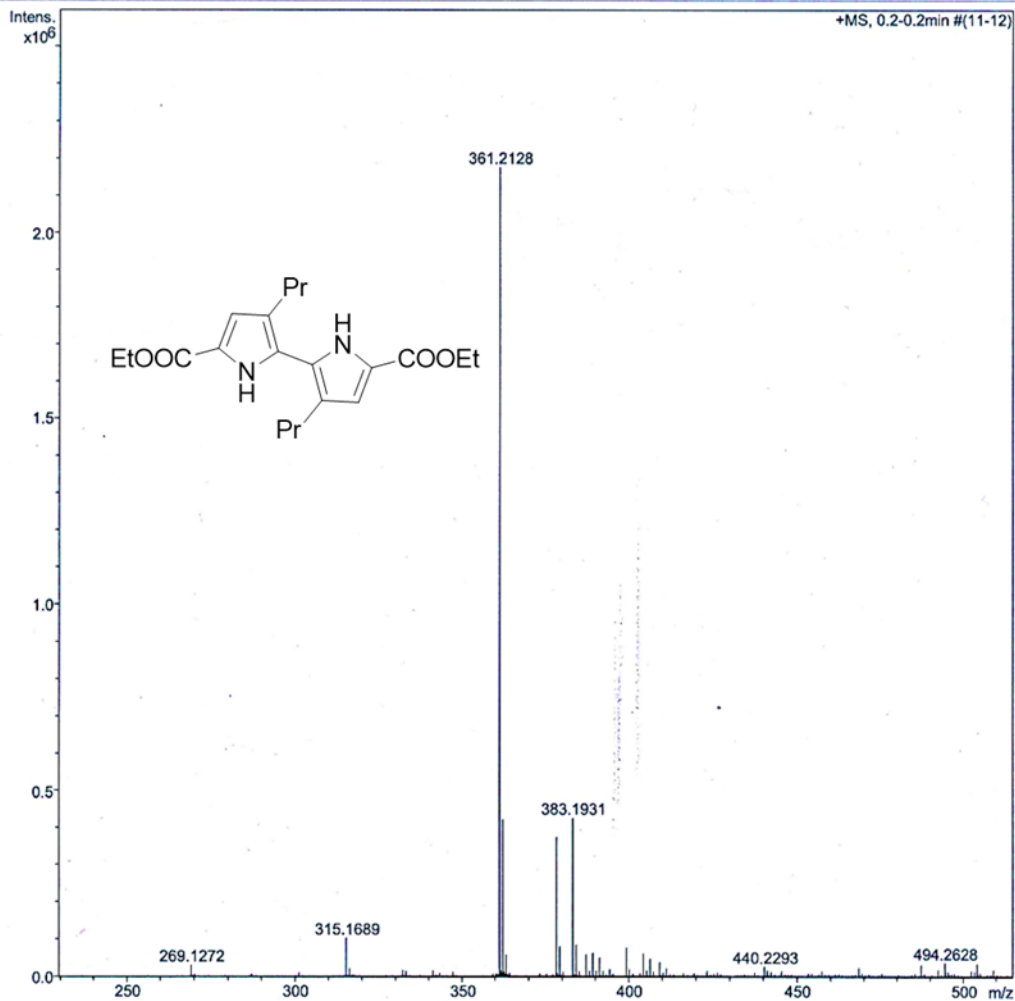

**Figure S9.** HRMS data of **4c**:  $[M+H]^+$  Calcd for  $C_{20}H_{29}N_2O_4$ : 361.2127; found: 361.2128.

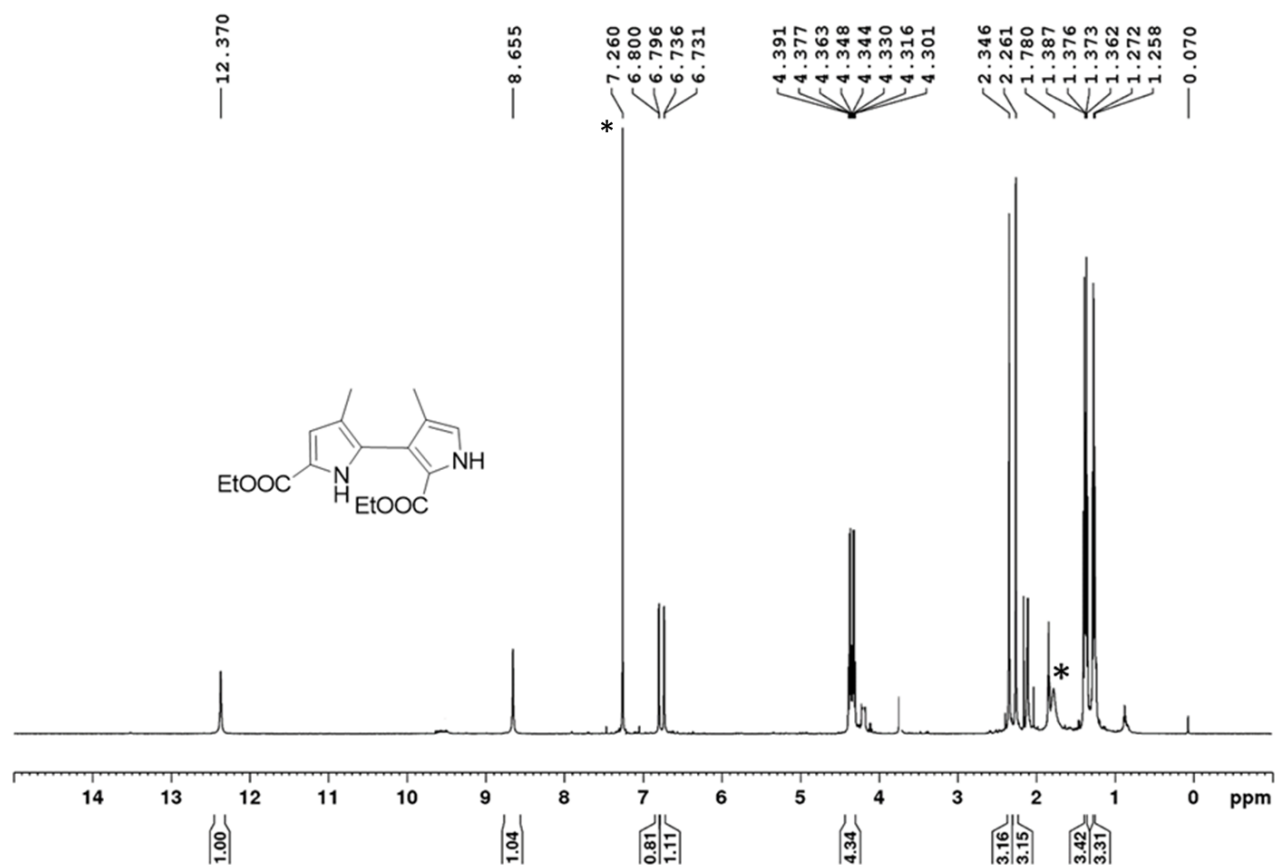

**Figure S10.**  $^1\text{H}$  NMR spectrum of the compound **5a** (500 MHz,  $\text{CDCl}_3$  ( $\delta = 7.26$ )). \* Residual solvent peak:  $\text{CDCl}_3$ ,  $\text{H}_2\text{O}$ .

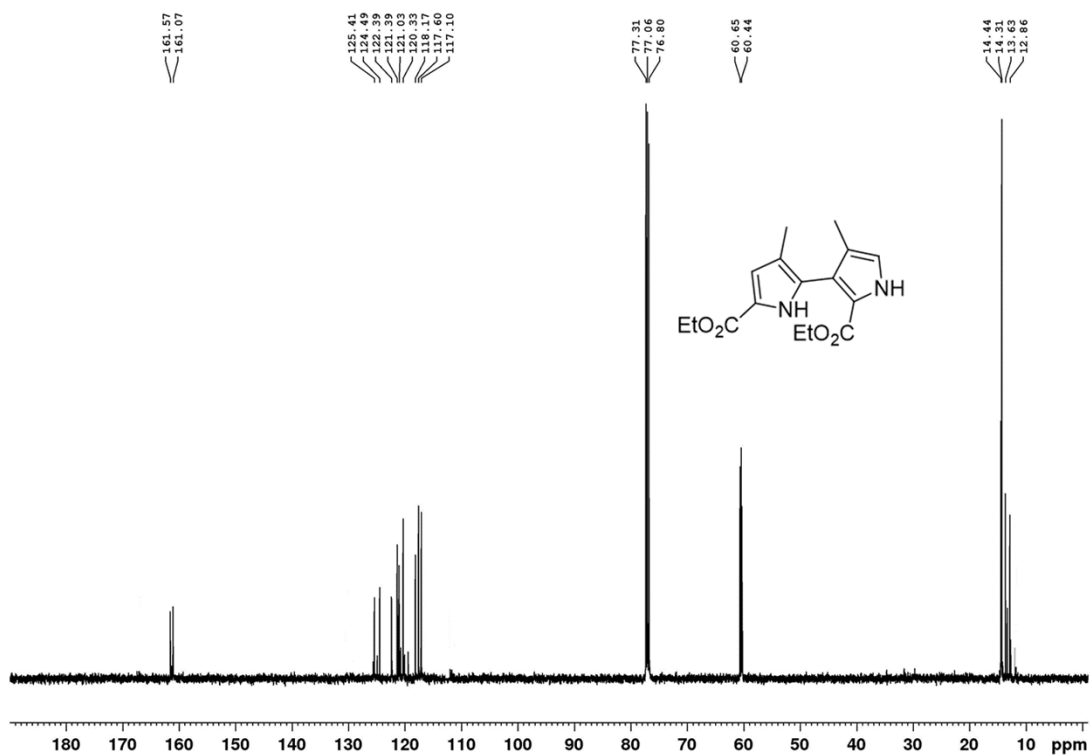

**Figure S11.** <sup>13</sup>C NMR spectrum of the compound **5a** (126 MHz, CDCl<sub>3</sub> (δ = 77 ppm)).

## Display Report

### Analysis Info

Analysis Name D:\Data\2021-data\PROF.PKP\NOWJN-1-87-2.d  
Method tune\_low\_Pos-R2.m  
Sample Name JN-1-87-2  
Comment

Acquisition Date 11/22/2021 3:33:15 PM

Operator BDAL  
Instrument maXis 255552.10138

### Acquisition Parameter

|             |            |                      |          |                  |           |
|-------------|------------|----------------------|----------|------------------|-----------|
| Source Type | ESI        | Ion Polarity         | Positive | Set Nebulizer    | 0.3 Bar   |
| Focus       | Not active | Set Capillary        | 3500 V   | Set Dry Heater   | 180 °C    |
| Scan Begin  | 50 m/z     | Set End Plate Offset | -500 V   | Set Dry Gas      | 4.0 l/min |
| Scan End    | 2580 m/z   | Set Charging Voltage | 0 V      | Set Divert Valve | Waste     |
|             |            | Set Corona           | 0 nA     | Set APCI Heater  | 0 °C      |

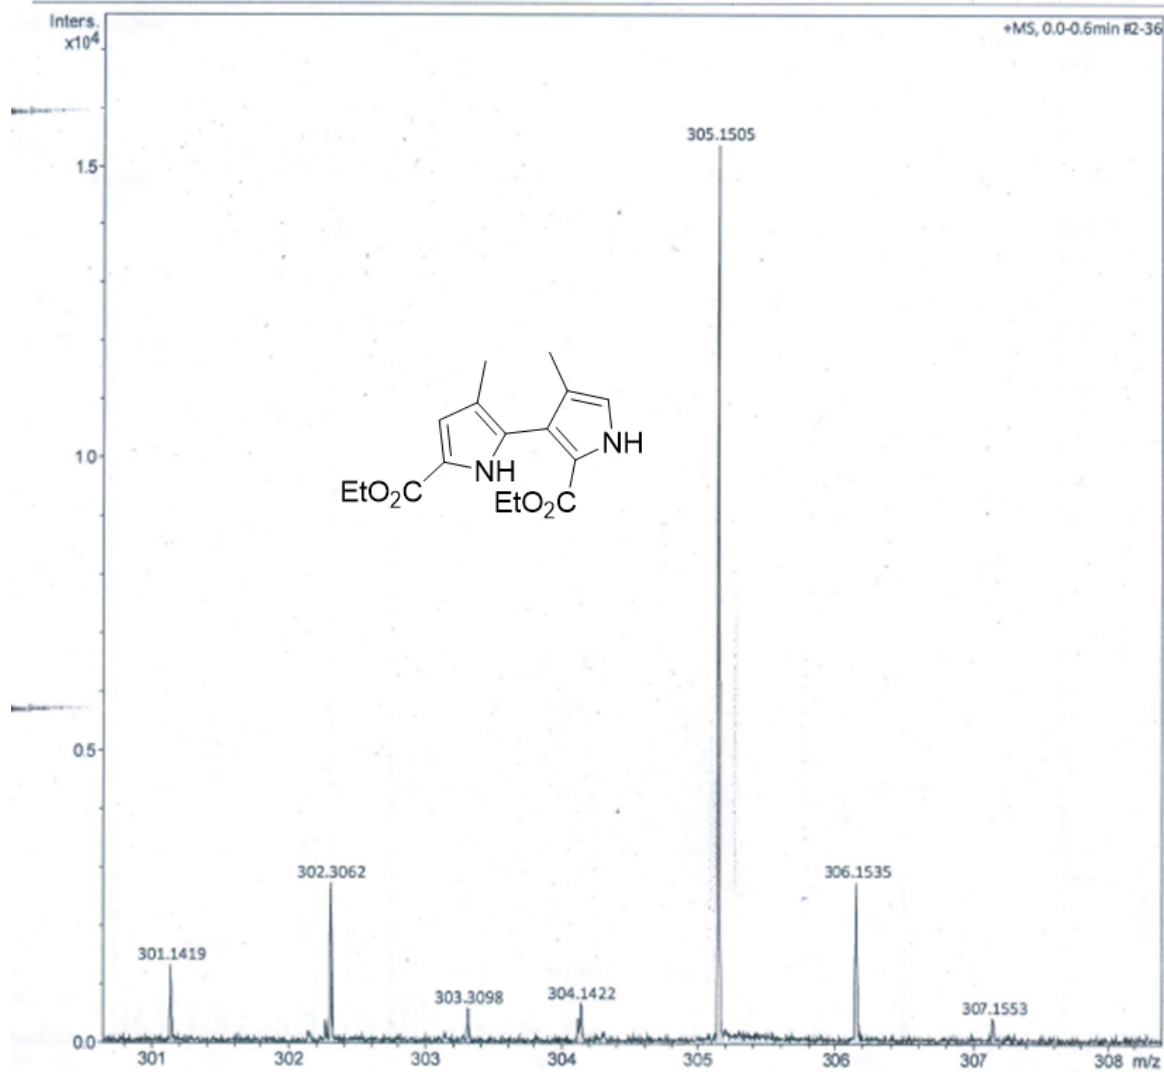

JN-1-87-2.d

Bruker Compass DataAnalysis 4.2

printed: 11/22/2021 3:37:59 PM

by: BDAL

Page 1 of 1

**Figure S12.** HRMS data of **5a**:  $[M+H]^+$  Calcd for  $C_{16}H_{21}N_2O_4$ : 305.1501; found: 305.1505.

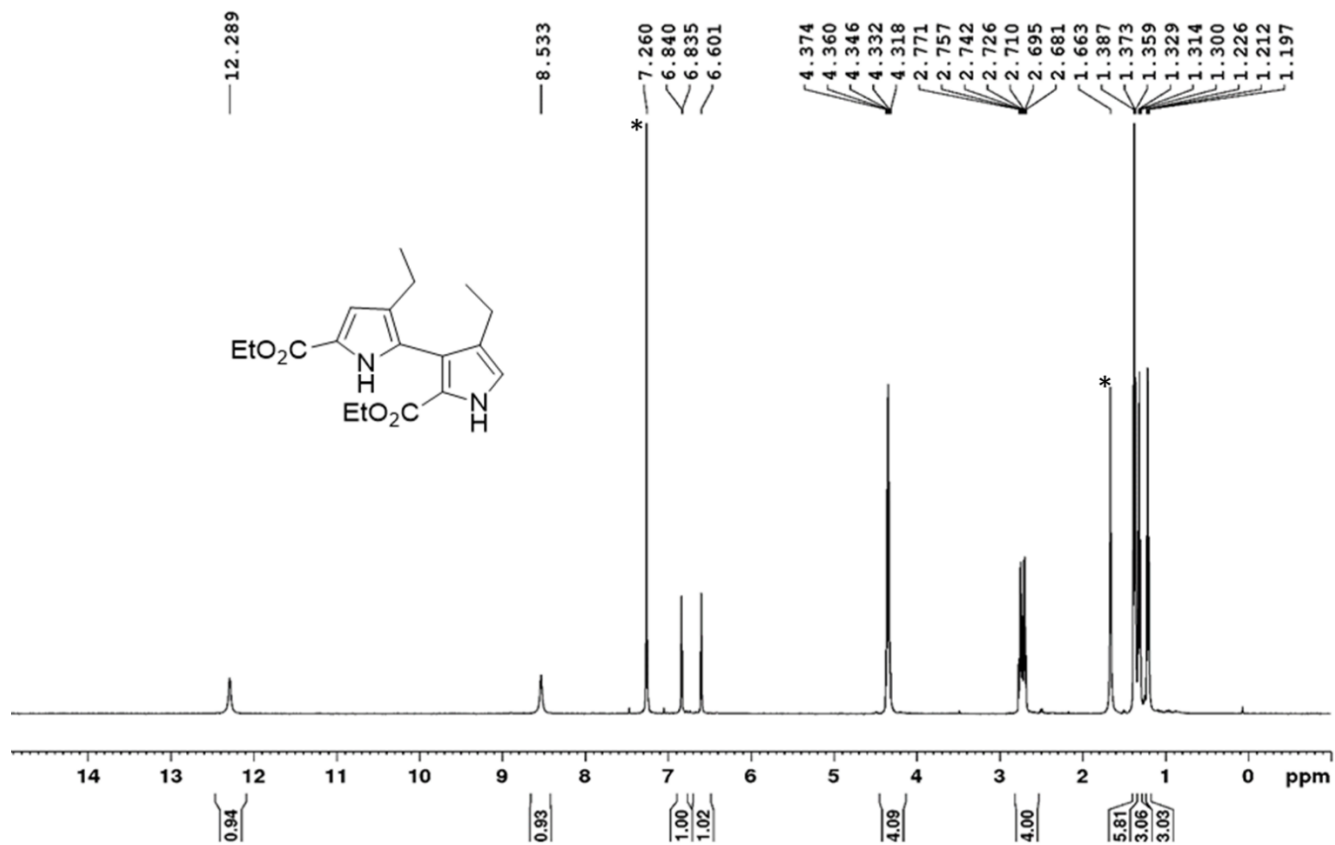

**Figure S13.** <sup>1</sup>H NMR spectrum of the compound **5b** (500 MHz, CDCl<sub>3</sub> (δ = 7.26)). \* Residual solvent peak: CDCl<sub>3</sub>, H<sub>2</sub>O.

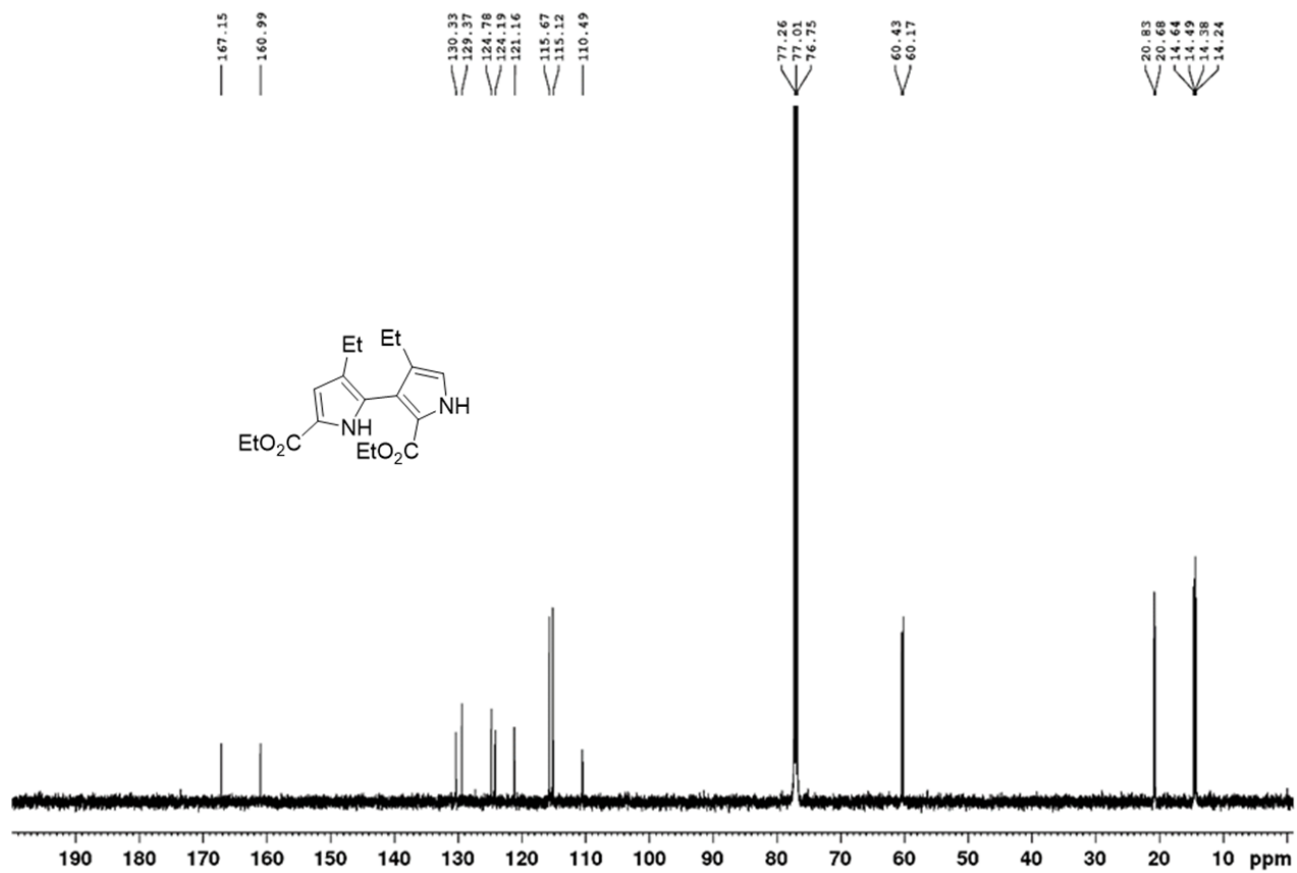

**Figure S14.**  $^{13}\text{C}$  NMR spectrum of the compound **5b** (126 MHz,  $\text{CDCl}_3$  ( $\delta = 77$  ppm)).

## Display Report

### Analysis Info

Analysis Name D:\Data\2021-data\PROF.PKP\NOV\JN-1-78-2R.d  
Method tune\_low\_Pos-R2.m  
Sample Name JN-1-78-2R  
Comment

Acquisition Date 11/22/2021 3:43:33 PM  
Operator BDAL  
Instrument maXis 255552.10138

### Acquisition Parameter

|             |            |                      |          |                  |           |
|-------------|------------|----------------------|----------|------------------|-----------|
| Source Type | ESI        | Ion Polarity         | Positive | Set Nebulizer    | 0.3 Bar   |
| Focus       | Not active | Set Capillary        | 3500 V   | Set Dry Heater   | 180 °C    |
| Scan Begin  | 50 m/z     | Set End Plate Offset | -500 V   | Set Dry Gas      | 4.0 l/min |
| Scan End    | 2580 m/z   | Set Charging Voltage | 0 V      | Set Divert Valve | Waste     |
|             |            | Set Corona           | 0 nA     | Set APCI Heater  | 0 °C      |

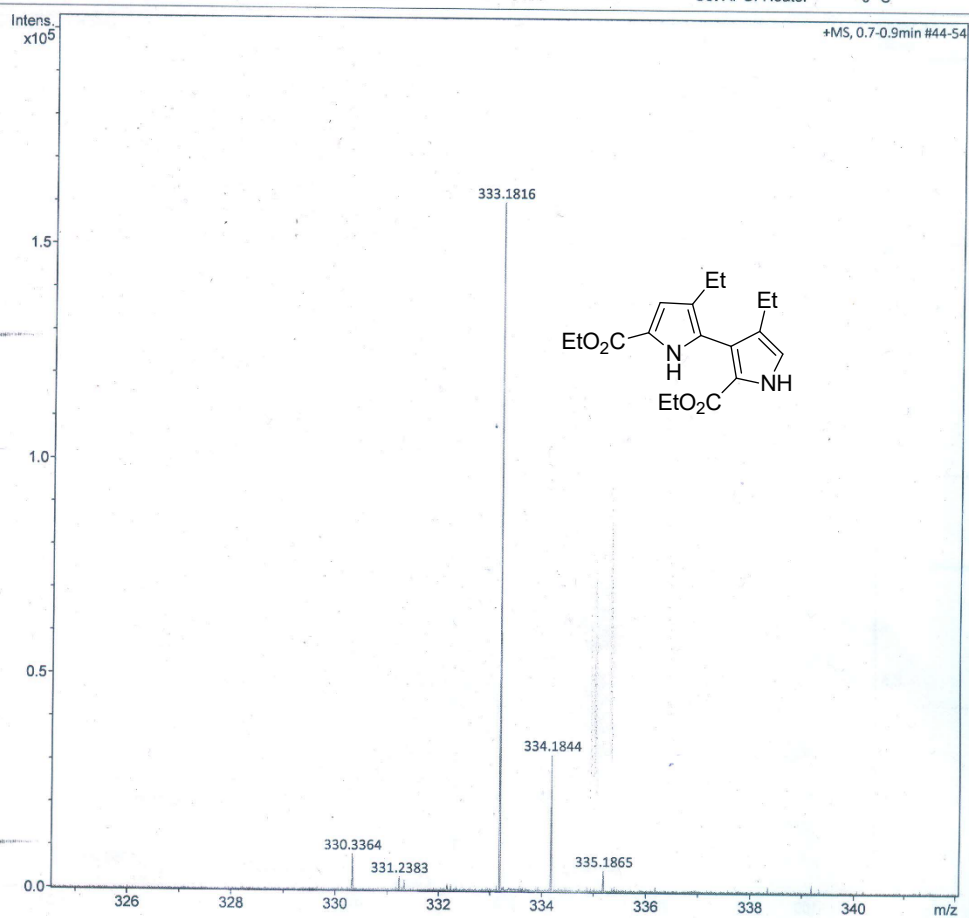

JN-1-78-2R.d

Bruker Compass DataAnalysis 4.2

printed: 11/22/2021 3:46:31 PM

by: BDAL

Page 1 of 1

**Figure S15.** HRMS data of **5b**:  $[M+H]^+$  Calcd for  $C_{18}H_{25}N_2O_4$ : 333.1814; found: 333.1816.



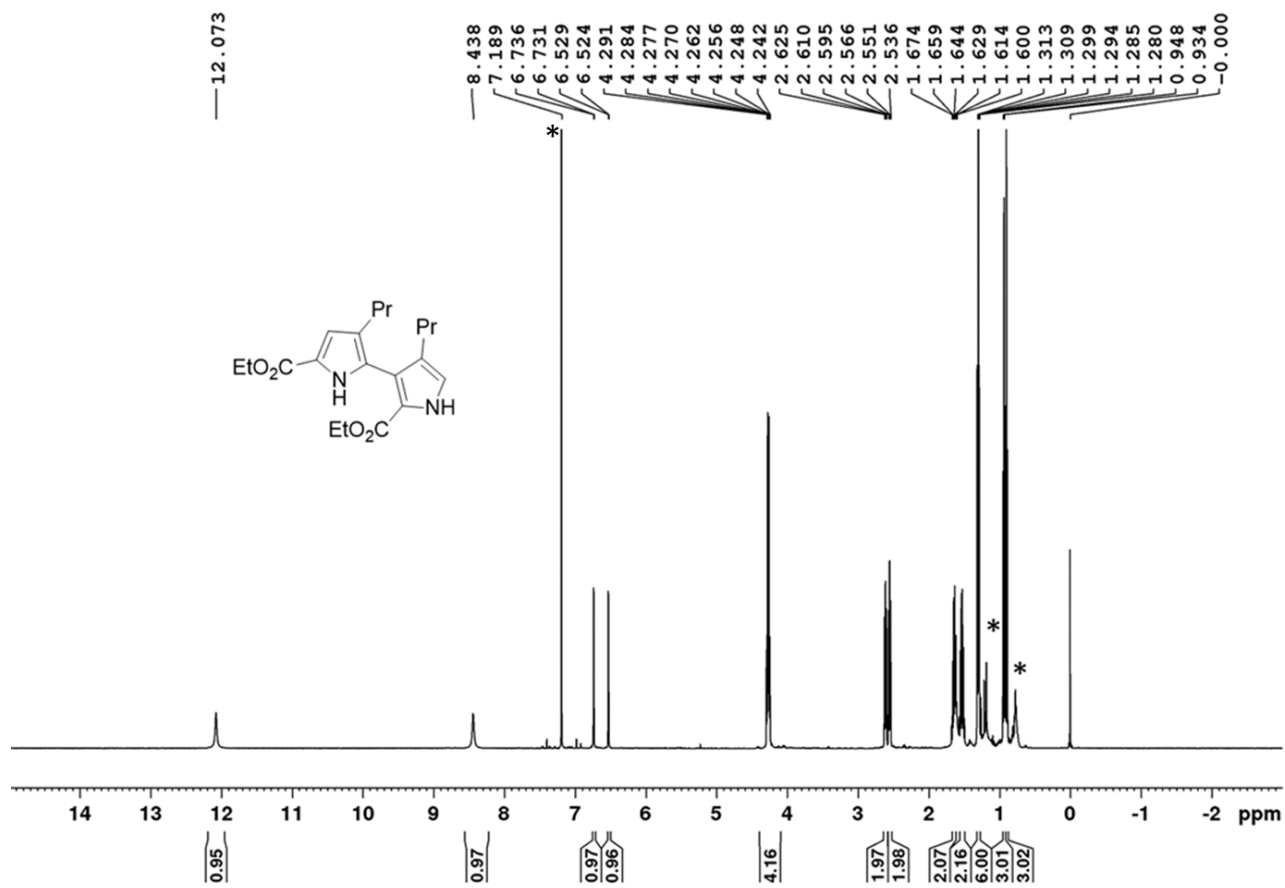

**Figure S16.** <sup>1</sup>H NMR spectrum of the compound **5c** (500 MHz, CDCl<sub>3</sub> TMS, δ = 0 ppm). \* Residual solvent peak: CDCl<sub>3</sub>, H<sub>2</sub>O and grease.

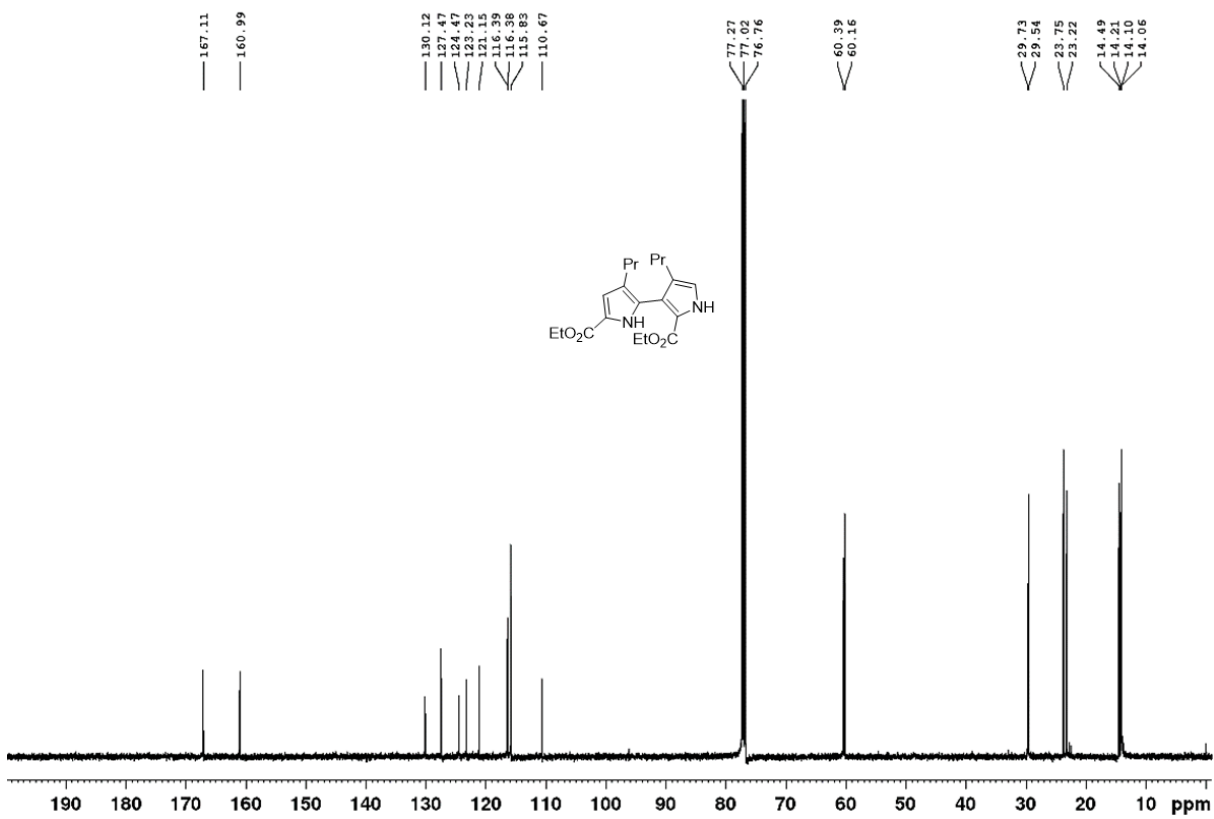

**Figure S17.**  $^{13}\text{C}$  NMR spectrum of the compound **5c** (126 MHz,  $\text{CDCl}_3$  ( $\delta = 77$  ppm)).

**Analysis Info**

Analysis Name D:\Data\2019\PROF.PKP\JULY\AD-BPY-UNSYMM.d  
Method tune\_low.m  
Sample Name AD-BPY-UNSYMM-DCM-MEOH  
Comment

Acquisition Date 7/18/2019 4:33:52 PM

Operator UOH-Chemistry  
Instrument maXis 10138

**Acquisition Parameter**

|             |            |                       |           |                  |           |
|-------------|------------|-----------------------|-----------|------------------|-----------|
| Source Type | ESI        | Ion Polarity          | Positive  | Set Nebulizer    | 0.4 Bar   |
| Focus       | Not active | Set Capillary         | 3800 V    | Set Dry Heater   | 200 °C    |
| Scan Begin  | 50 m/z     | Set End Plate Offset  | -500 V    | Set Dry Gas      | 6.0 l/min |
| Scan End    | 1800 m/z   | Set Collision Cell RF | 350.0 Vpp | Set Divert Valve | Waste     |

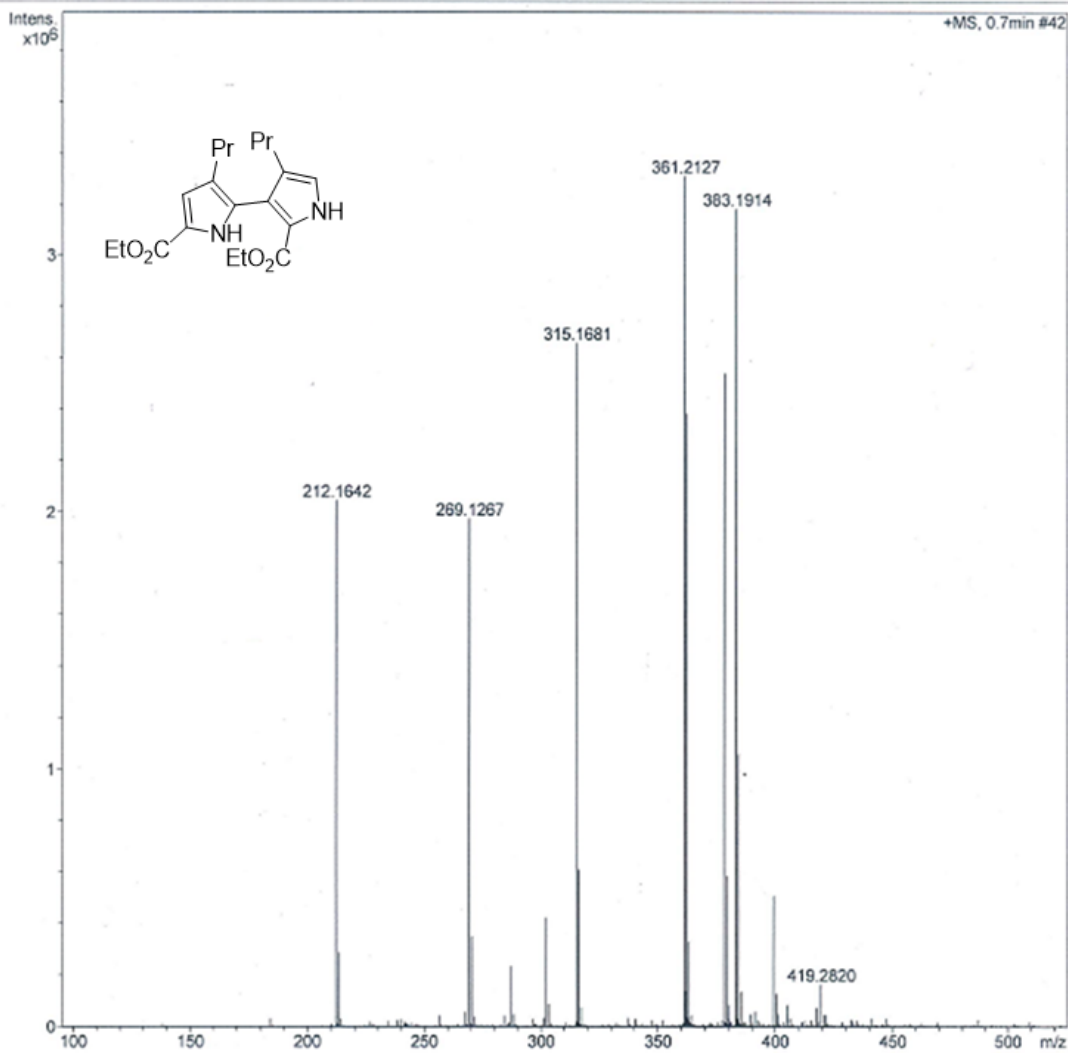

Bruker Compass DataAnalysis 4.0

printed: 7/18/2019 4:38:38 PM

Page 1 of 1

**Figure S18.** HRMS data of **5c**:  $[M+H]^+$  Calcd for  $C_{20}H_{29}N_2O_4$ : 361.2127; found: 361.2128.

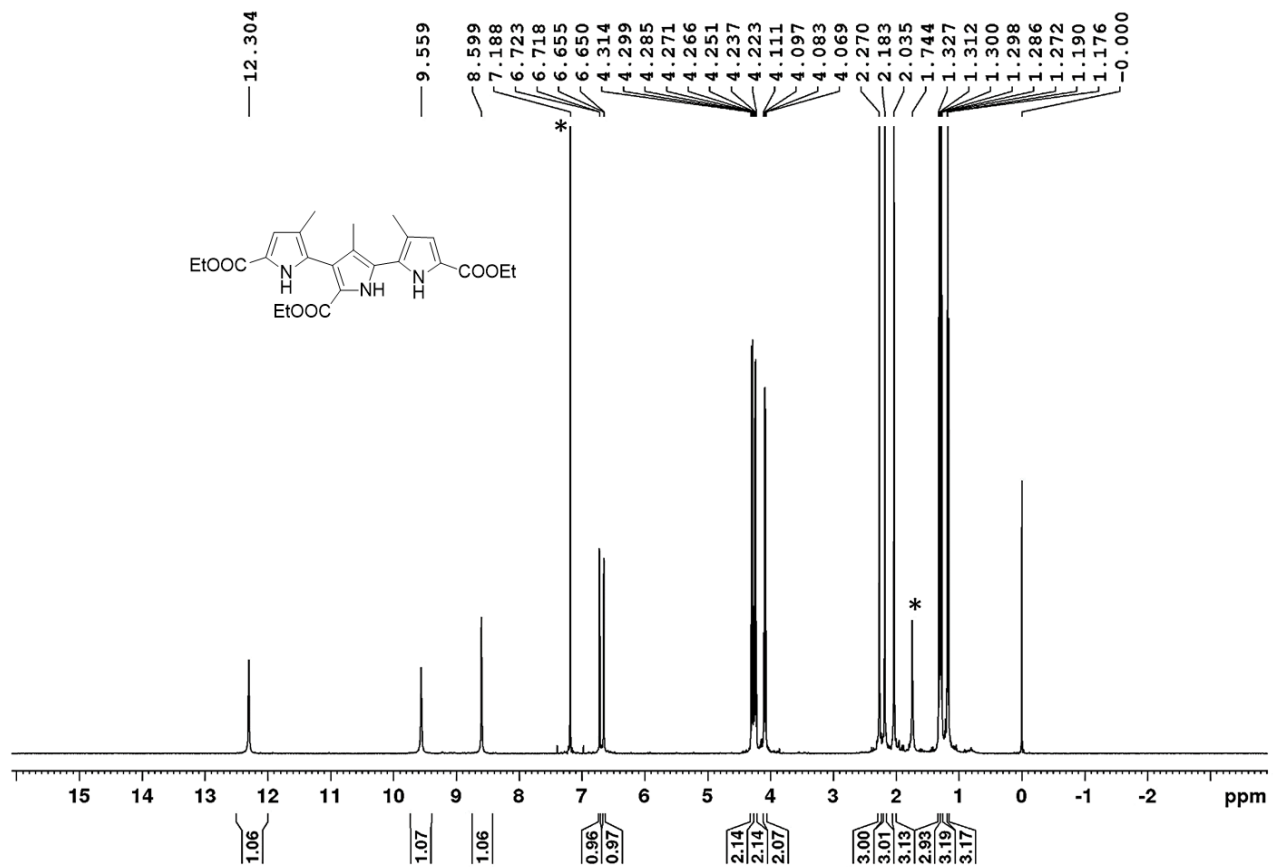

**Figure S19.**  $^1\text{H}$  NMR spectrum of the compound **6a** (500 MHz,  $\text{CDCl}_3$  TMS,  $\delta = 0$  ppm) \* Residual solvent peak:  $\text{CDCl}_3$ ,  $\text{H}_2\text{O}$ .

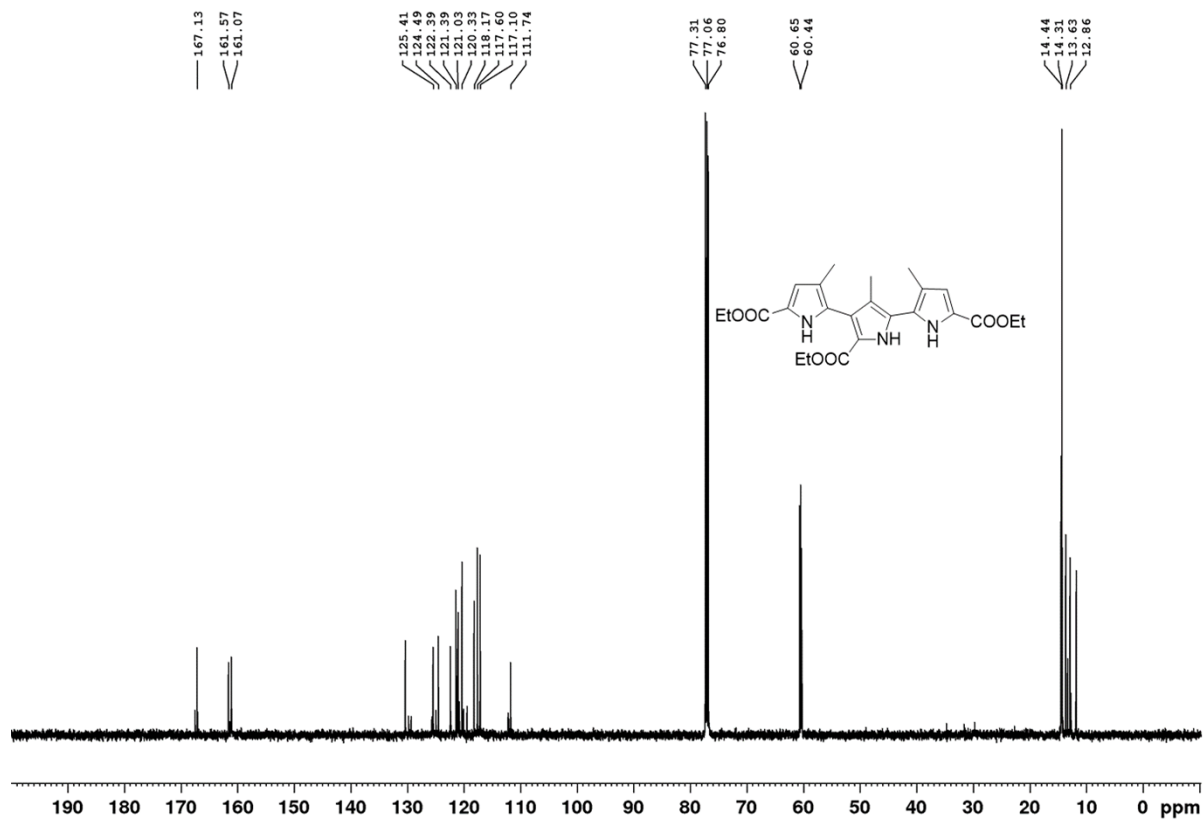

**Figure S20.**  $^{13}\text{C}$  NMR spectrum of the compound **6a** (126 MHz,  $\text{CDCl}_3$  ( $\delta = 77$  ppm)).

## Display Report

### Analysis Info

Analysis Name D:\Data\2021-data\PROF.PKP\NOV\SSS-1-8-5.d  
Method tune\_low.m  
Sample Name SSS-1-8-5  
Comment

Acquisition Date 11/23/2021 3:05:07 PM

Operator BDAL  
Instrument maXis 255552.10138

### Acquisition Parameter

|             |            |                      |          |                  |           |
|-------------|------------|----------------------|----------|------------------|-----------|
| Source Type | ESI        | Ion Polarity         | Positive | Set Nebulizer    | 0.3 Bar   |
| Focus       | Not active | Set Capillary        | 4500 V   | Set Dry Heater   | 180 °C    |
| Scan Begin  | 50 m/z     | Set End Plate Offset | -500 V   | Set Dry Gas      | 4.0 l/min |
| Scan End    | 2000 m/z   | Set Charging Voltage | 0 V      | Set Divert Valve | Waste     |
|             |            | Set Corona           | 0 nA     | Set APCI Heater  | 0 °C      |

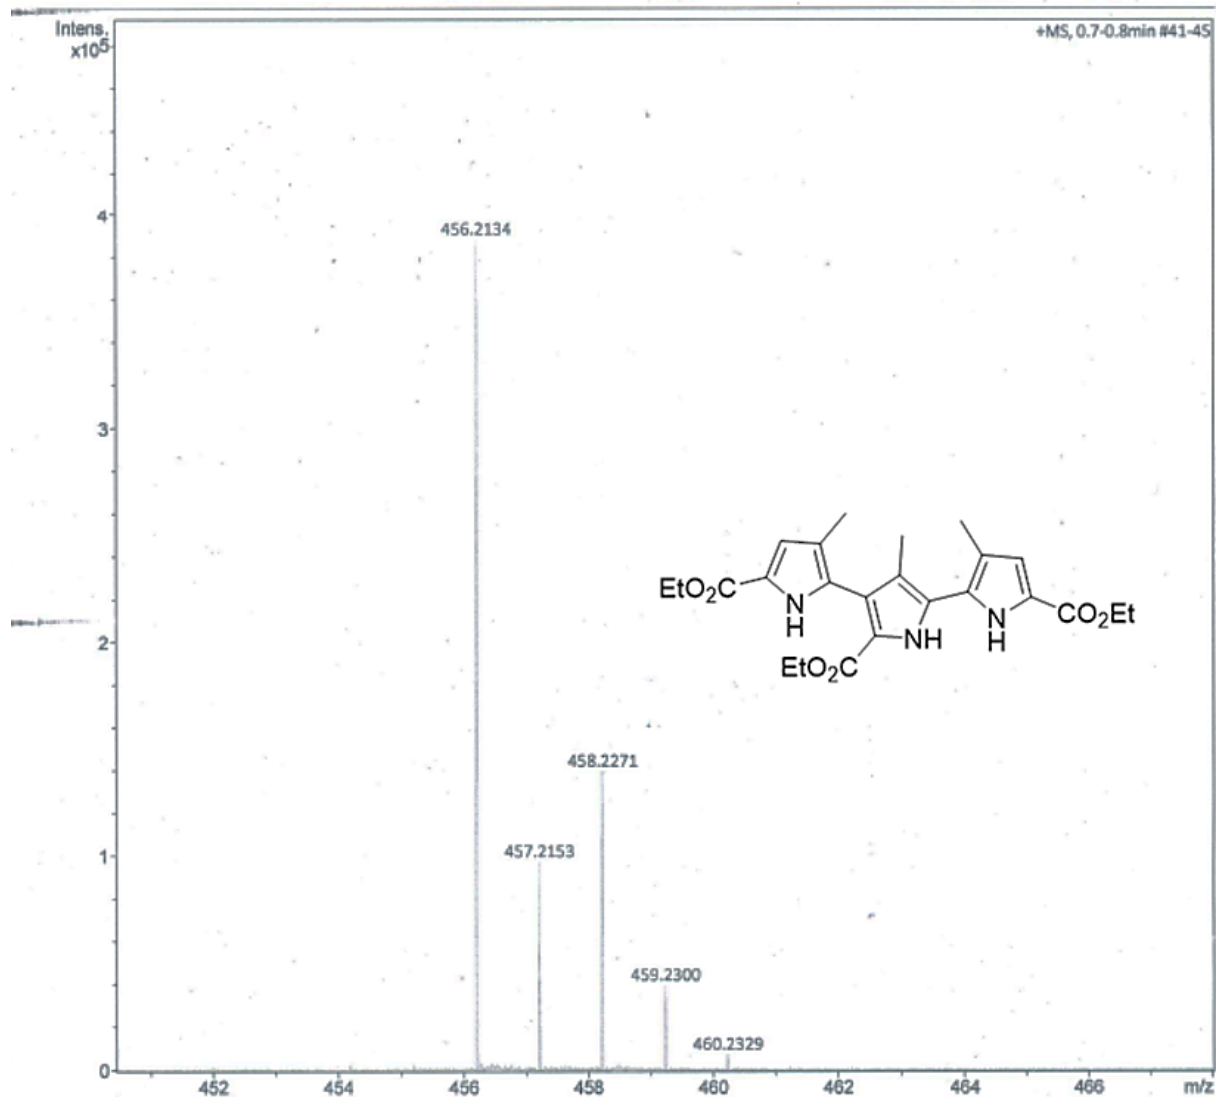

**Figure S21.** HRMS data of **6a**: [M+H]<sup>+</sup> Calcd for C<sub>24</sub>H<sub>30</sub>N<sub>3</sub>O<sub>6</sub>: 456.2134; found: 456.2134.



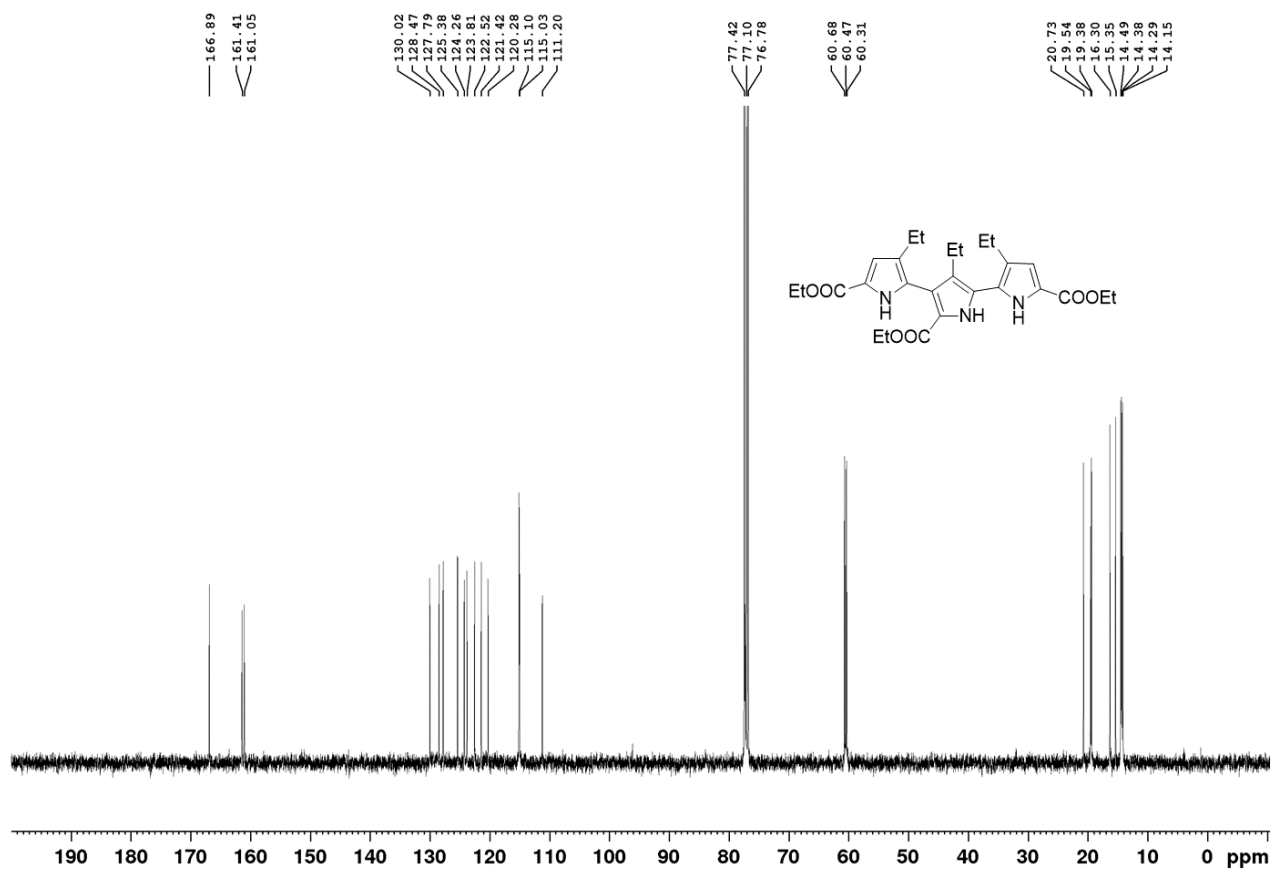

**Figure S23.**  $^{13}\text{C}$  NMR spectrum of the compound **6b** (126 MHz,  $\text{CDCl}_3$  ( $\delta = 77$  ppm)).



## Display Report

### Analysis Info

Analysis Name D:\Data\2021-data\PROF.PKPINOWJN-1-78-3-1.d  
Method Tune Low method 2021.m  
Sample Name JN-1-78-3-1  
Comment

Acquisition Date 11/29/2021 12:18:04 PM

Operator BDAL  
Instrument maXis 255552.10138

### Acquisition Parameter

|             |            |                      |          |                  |           |
|-------------|------------|----------------------|----------|------------------|-----------|
| Source Type | ESI        | Ion Polarity         | Positive | Set Nebulizer    | 0.7 Bar   |
| Focus       | Not active | Set Capillary        | 4500 V   | Set Dry Heater   | 200 °C    |
| Scan Begin  | 50 m/z     | Set End Plate Offset | -500 V   | Set Dry Gas      | 3.0 l/min |
| Scan End    | 1800 m/z   | Set Charging Voltage | 0 V      | Set Divert Valve | Waste     |
|             |            | Set Corona           | 0 nA     | Set APCI Heater  | 0 °C      |

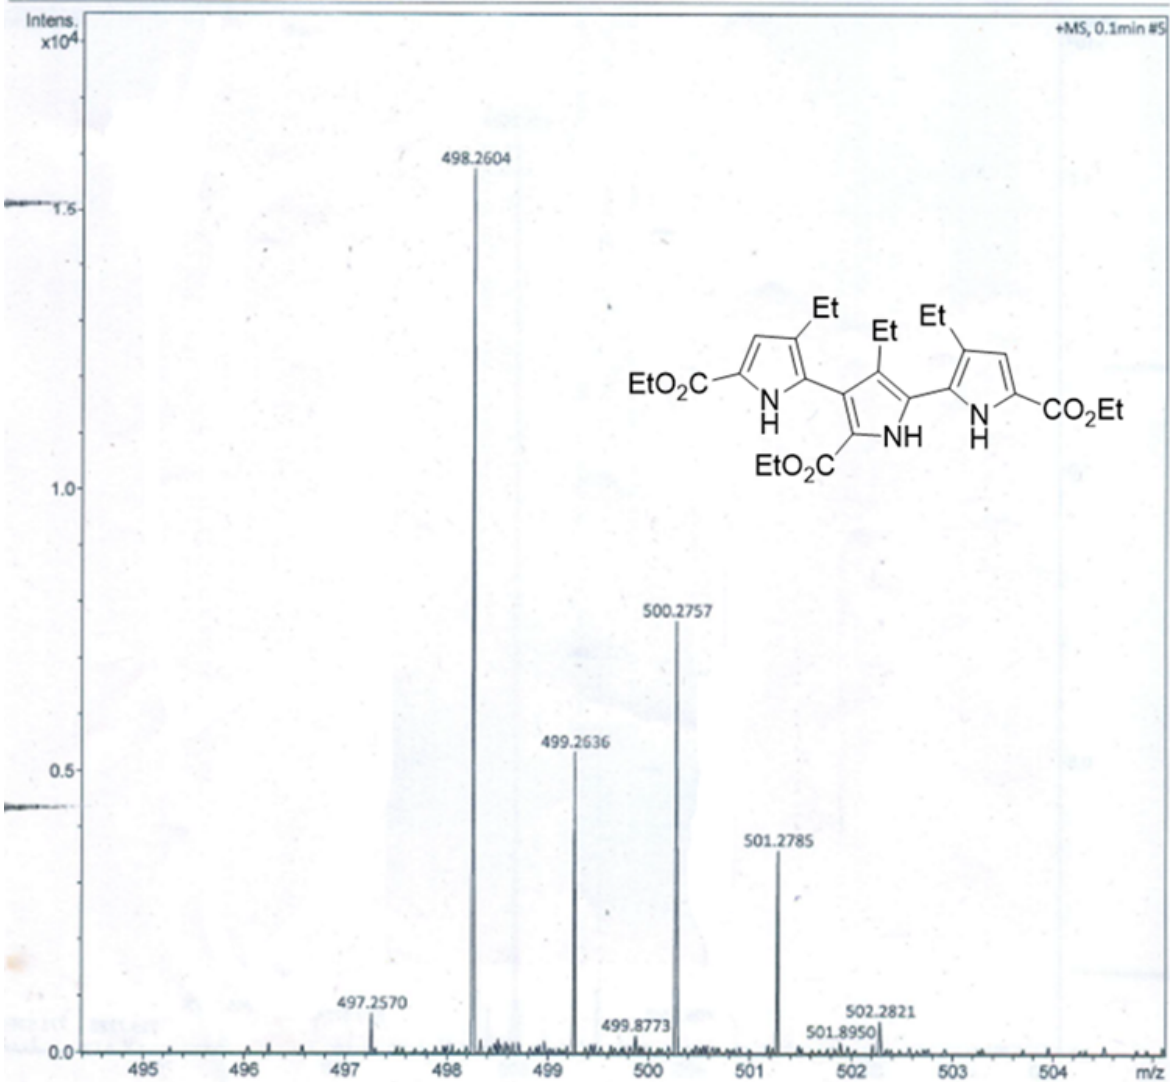

JN-1-78-3-1.d

Bruker Compass DataAnalysis 4.2

printed: 11/29/2021 12:18:57 PM

by: BDAL

Page 1 of 1

**Figure S24.** HRMS data of **6b**: [M+H]<sup>+</sup> Calcd for C<sub>27</sub>H<sub>36</sub>N<sub>3</sub>O<sub>6</sub>: 498.2604; found: 498.2604.

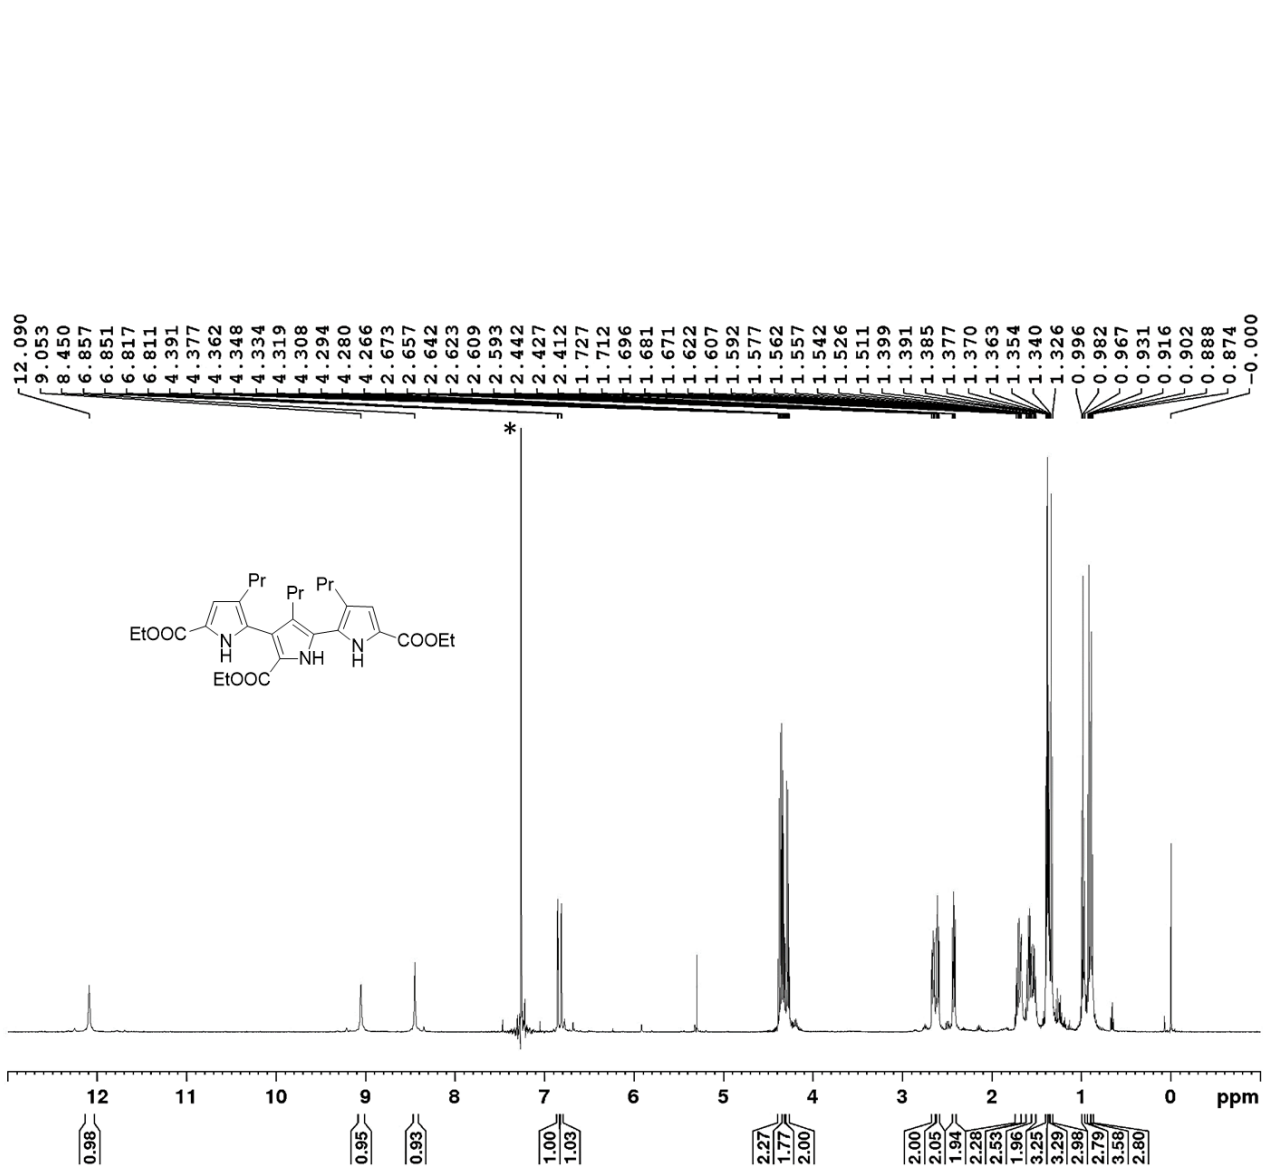

**Figure S25.**  $^1\text{H}$  NMR spectrum of the compound **6c** (500 MHz,  $\text{CDCl}_3$ , TMS,  $\delta = 0$  ppm) \* Residual solvent peak:  $\text{CDCl}_3$ .

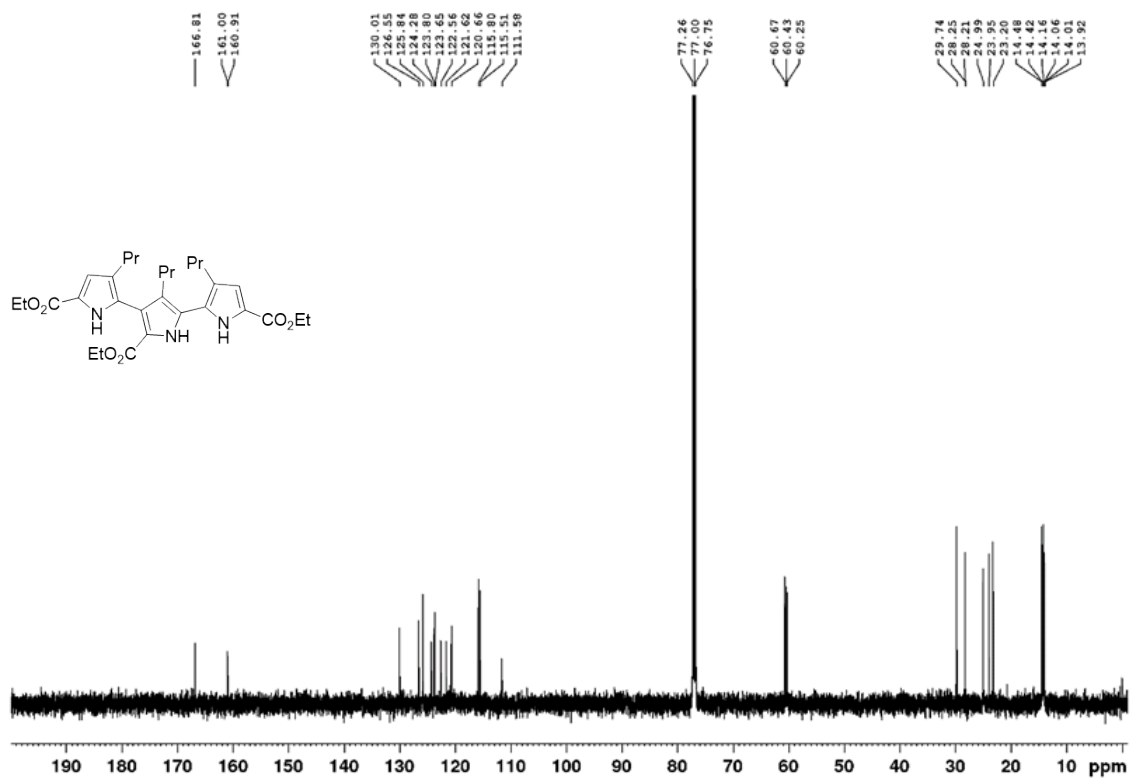

**Figure S26.** <sup>13</sup>C NMR spectrum of the compound **6c** (126 MHz, CDCl<sub>3</sub> (δ = 77 ppm)).

## Display Report

### Analysis Info

Analysis Name D:\Data\2019\PROF.PKP\JULY\AD-TERPYROLE.d  
Method tune\_low\_Pos.m  
Sample Name AD-TERPYROLE-DCM-MEOH  
Comment

Acquisition Date 7/18/2019 4:45:18 PM

Operator UOH-Chemistry  
Instrument maXis 10138

### Acquisition Parameter

|             |            |                       |           |                  |           |
|-------------|------------|-----------------------|-----------|------------------|-----------|
| Source Type | ESI        | Ion Polarity          | Positive  | Set Nebulizer    | 0.3 Bar   |
| Focus       | Not active | Set Capillary         | 4200 V    | Set Dry Heater   | 180 °C    |
| Scan Begin  | 50 m/z     | Set End Plate Offset  | -500 V    | Set Dry Gas      | 6.0 l/min |
| Scan End    | 1500 m/z   | Set Collision Cell RF | 350.0 Vpp | Set Divert Valve | Waste     |

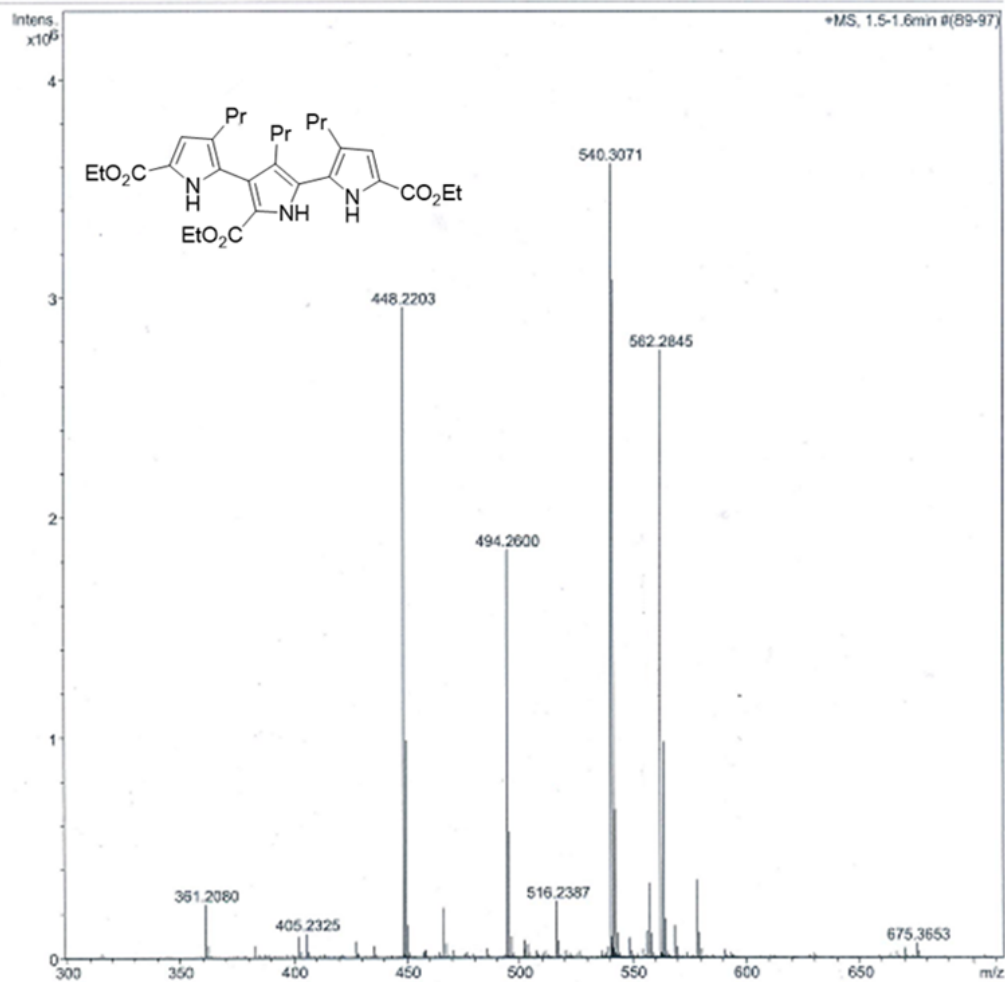

Bruker Compass DataAnalysis 4.0

printed: 7/18/2019 4:49:12 PM

Page 1 of 1

**Figure S27.** HRMS data of **6c**:  $[M+H]^+$  Calcd for  $C_{30}H_{41}N_3O_6$ : 540.3073; found: 540.3071.

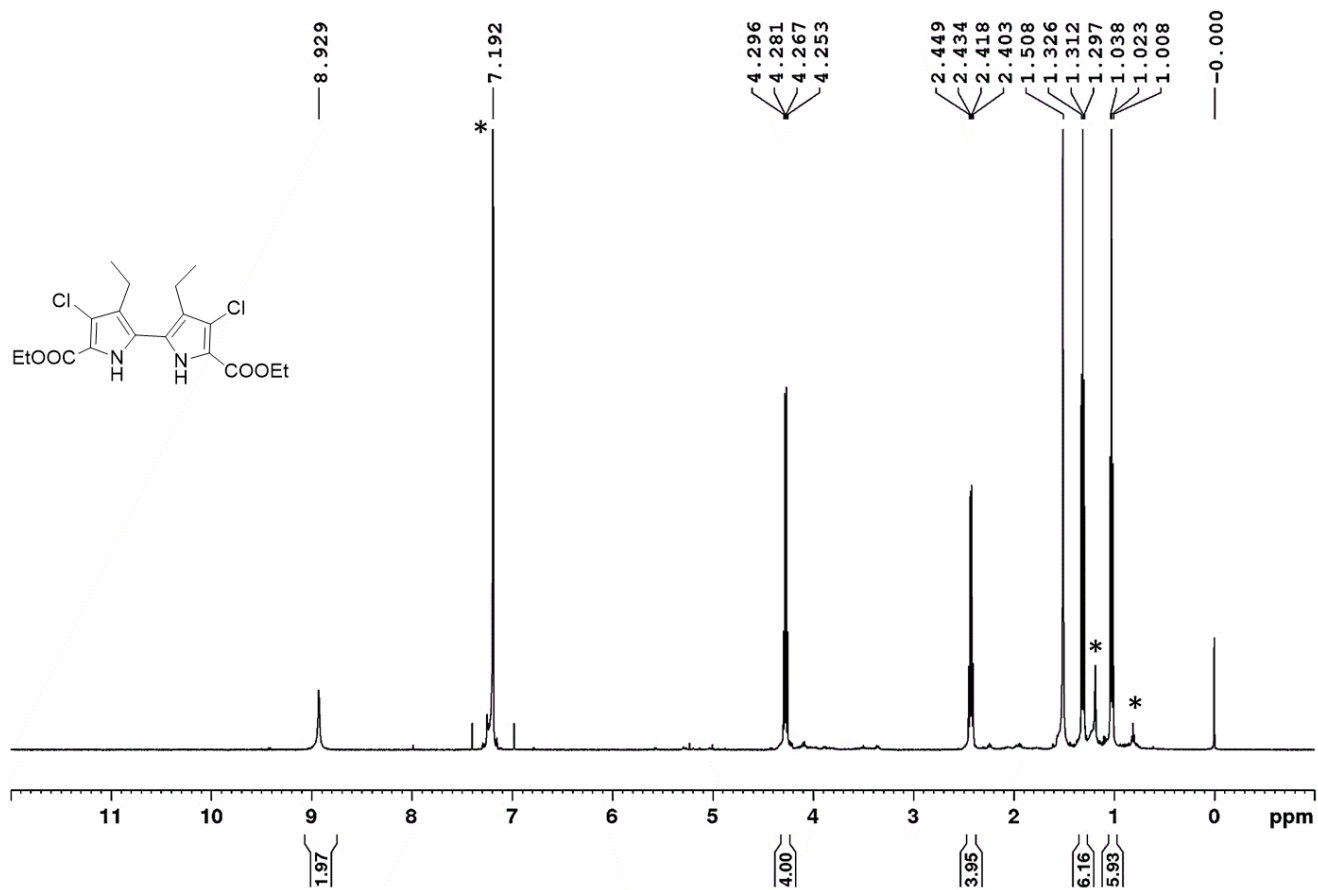

**Figure S28.** <sup>1</sup>H NMR spectrum of the compound **4b-Cl** (500 MHz, CDCl<sub>3</sub>, TMS, δ = 0 ppm). \*Residual belongs to CDCl<sub>3</sub>, H<sub>2</sub>O and grease.

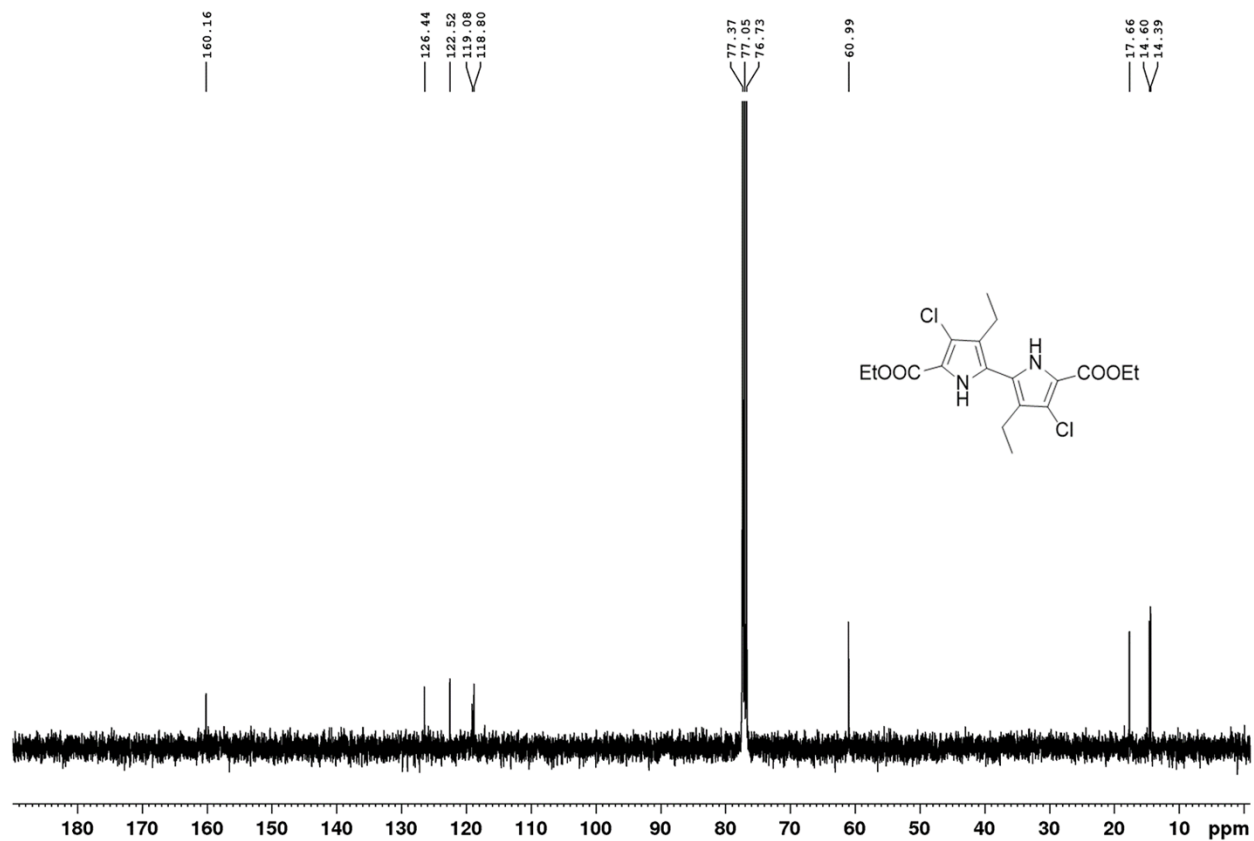

**Figure S29.** <sup>13</sup>C NMR spectrum of **4b-Cl** (126 MHz, CDCl<sub>3</sub> (δ = 77 ppm)).

## Display Report

### Analysis Info

Analysis Name D:\Data\2021-data\PROF.PKP\DEC\JN-1-100-1.d  
Method tune\_low.m  
Sample Name JN-1-100-1  
Comment

Acquisition Date 12/9/2021 3:16:47 PM

Operator BDAL  
Instrument maXis 255552.10138

### Acquisition Parameter

|             |            |                      |          |                  |           |
|-------------|------------|----------------------|----------|------------------|-----------|
| Source Type | ESI        | Ion Polarity         | Positive | Set Nebulizer    | 0.3 Bar   |
| Focus       | Not active | Set Capillary        | 2800 V   | Set Dry Heater   | 180 °C    |
| Scan Begin  | 50 m/z     | Set End Plate Offset | -500 V   | Set Dry Gas      | 4.0 l/min |
| Scan End    | 2000 m/z   | Set Charging Voltage | 0 V      | Set Divert Valve | Waste     |
|             |            | Set Corona           | 0 nA     | Set APCI Heater  | 0 °C      |

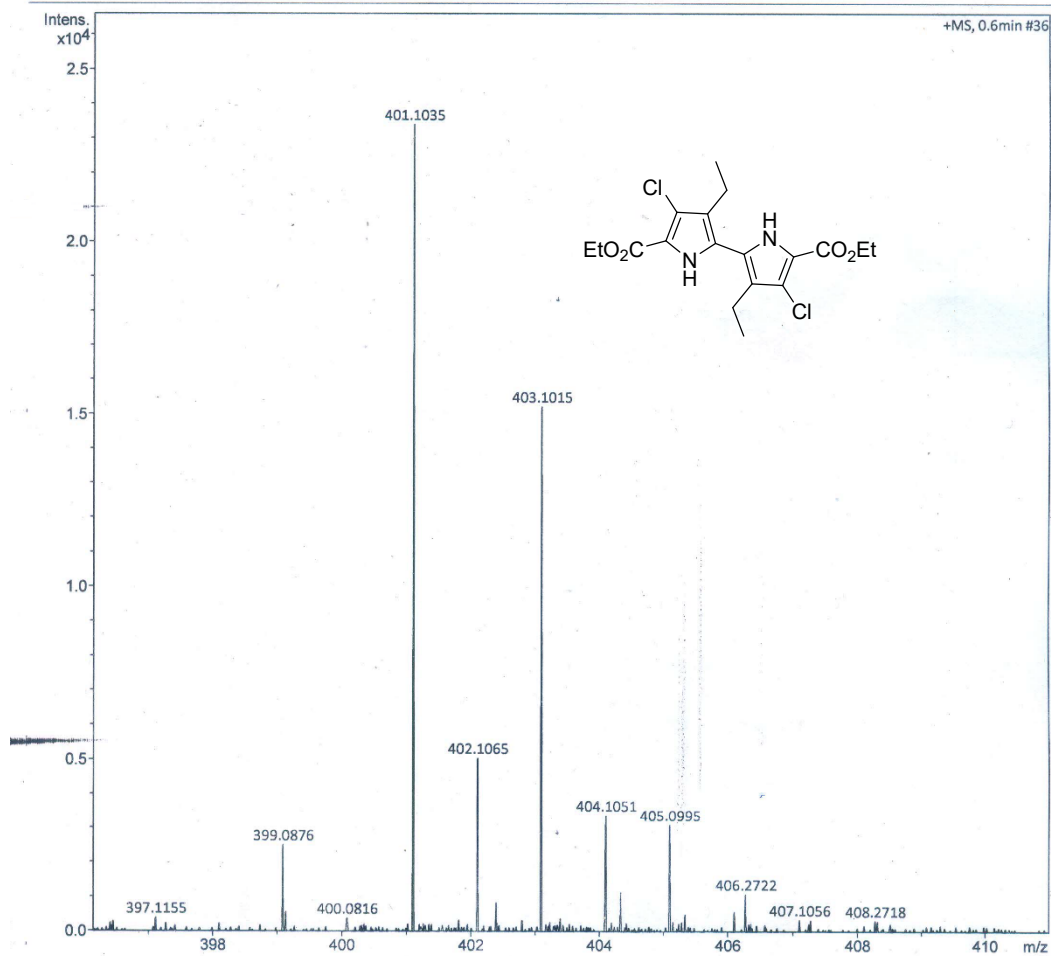

JN-1-100-1.d

Bruker Compass DataAnalysis 4.2

printed: 12/9/2021 3:22:05 PM

by: BDAL

Page 1 of 1

**Figure S30.** HRMS data of **4b-Cl**:  $[M+H]^+$  Calcd for  $C_{18}H_{23}N_2O_4Cl_2$ : 401.1035; found: 401.1035.

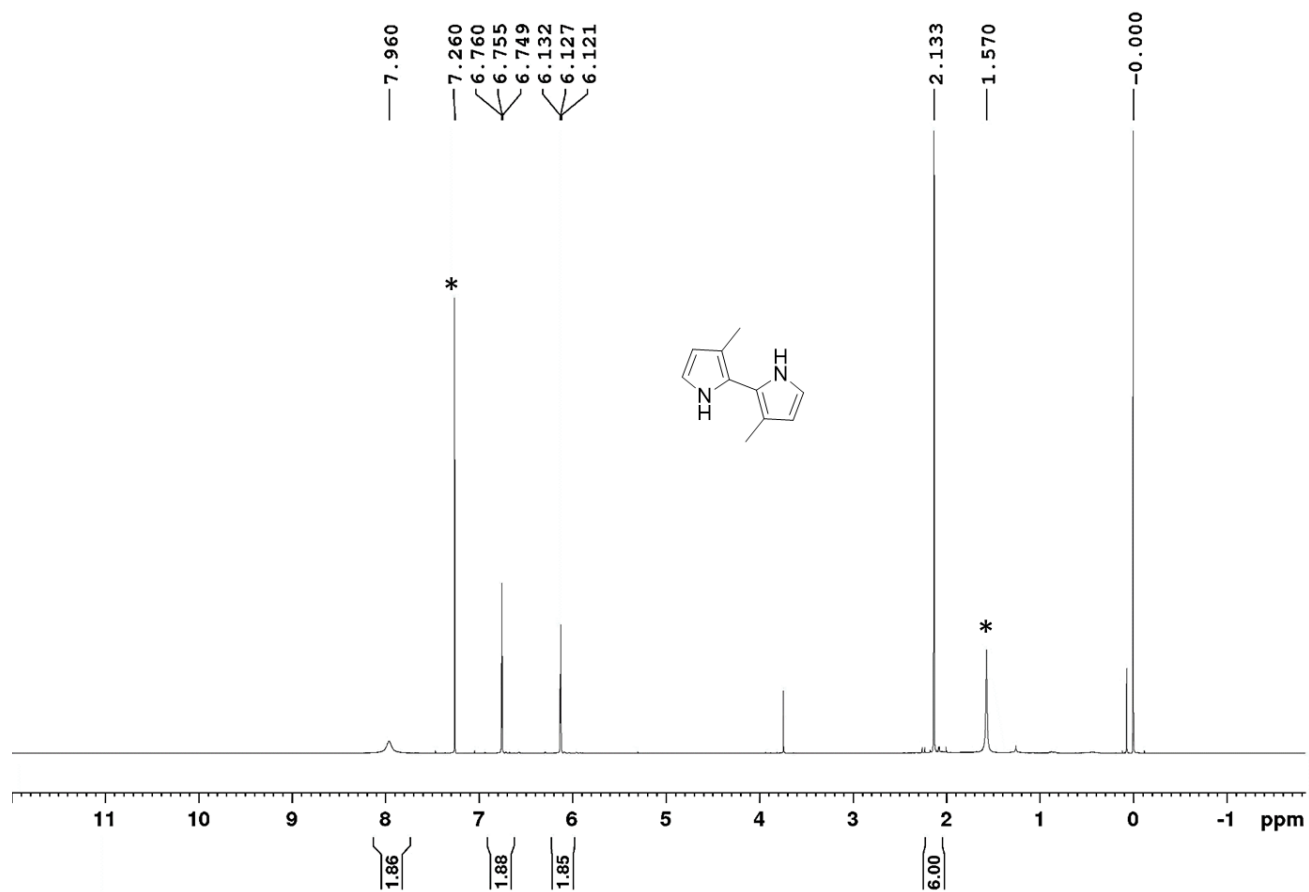

**Figure S31.** <sup>1</sup>H NMR spectrum of the compound **3a** (500 MHz, CDCl<sub>3</sub> TMS, δ = 0 ppm). \* Residual solvent peak: CDCl<sub>3</sub>, H<sub>2</sub>O.



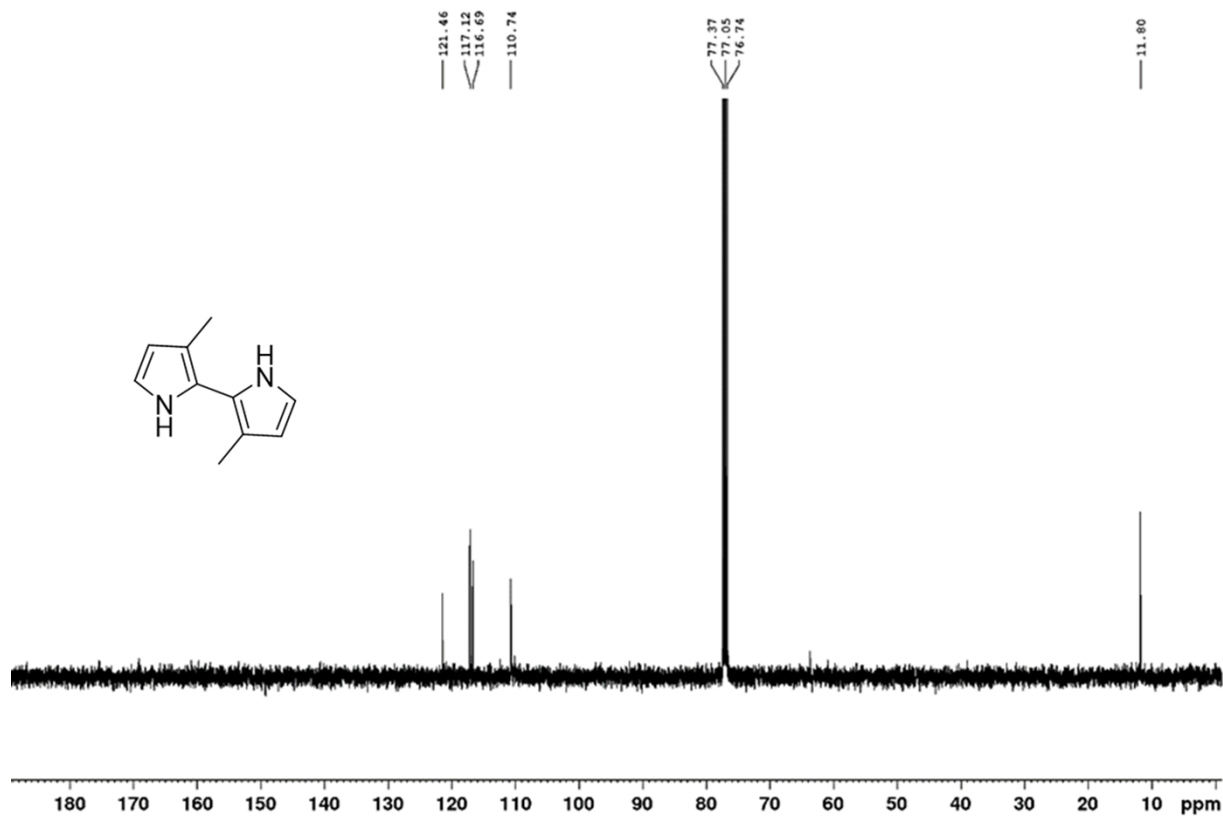

**Figure S32.** <sup>13</sup>C NMR spectrum of the compound **3a** (126 MHz, CDCl<sub>3</sub> (δ = 77 ppm)).

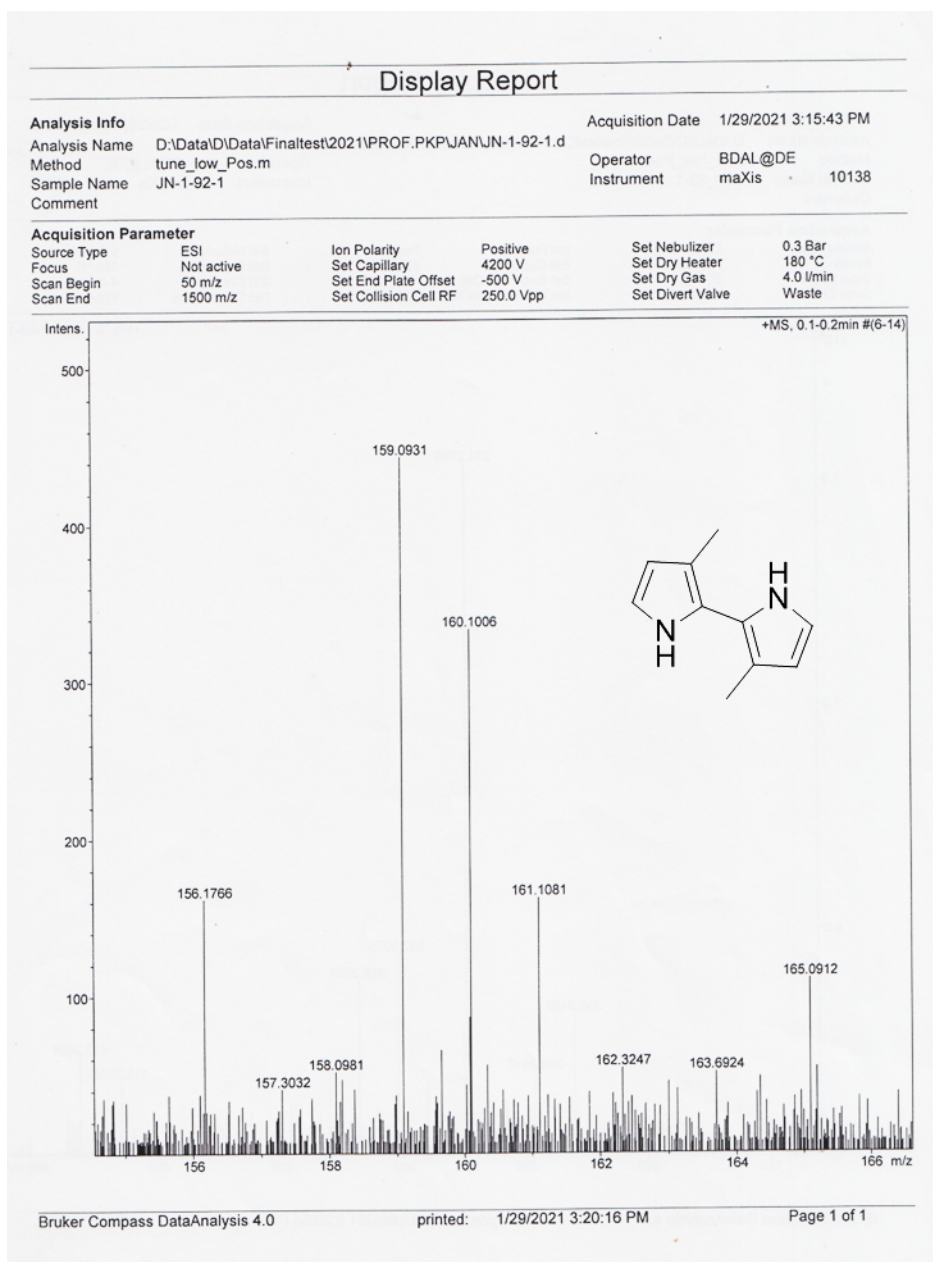

**Figure S33.** HRMS data of **3a**:  $[M+H]^+$  Calcd for  $C_{10}H_{12}N_2$ : 160.1000; found: 160.1006.

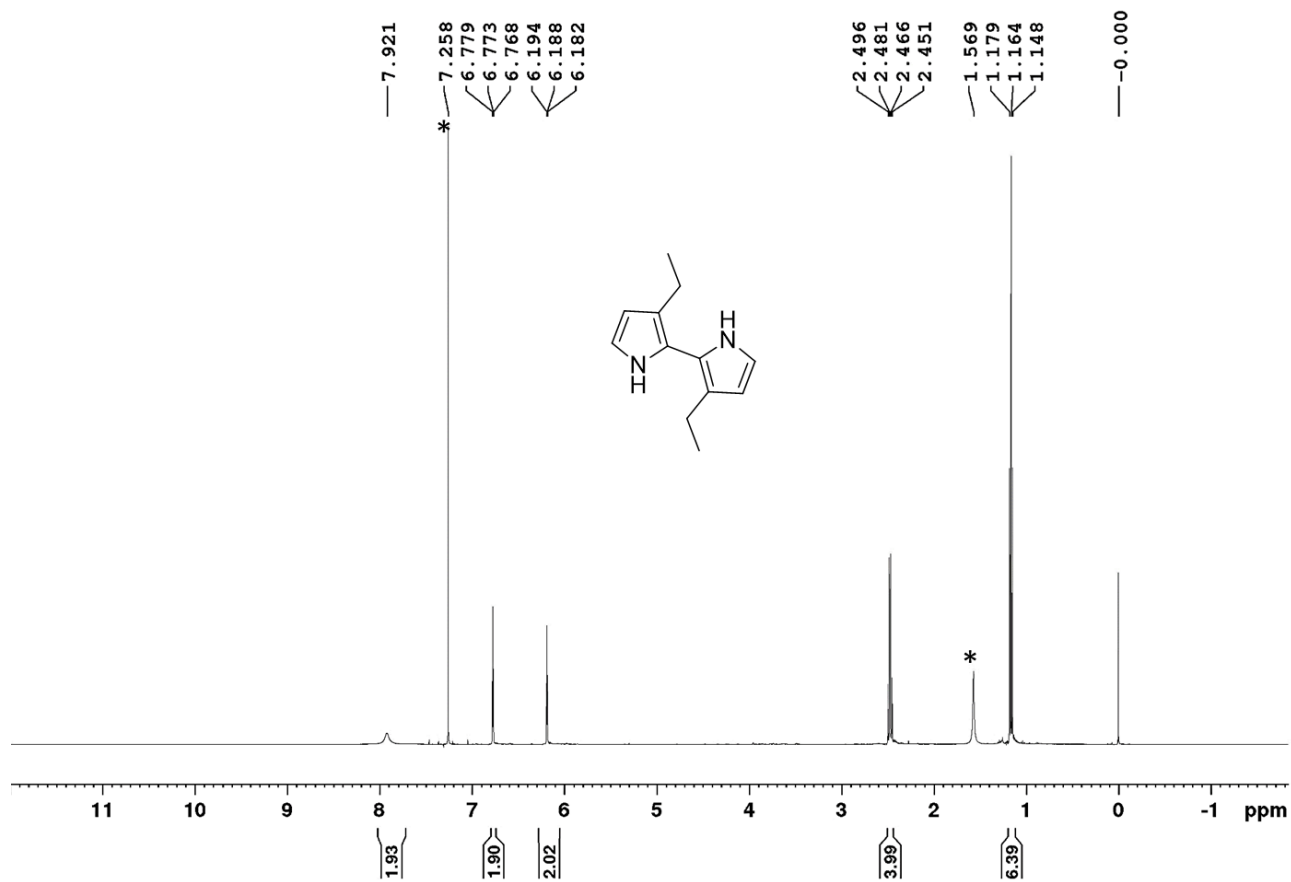

**Figure S34.** <sup>1</sup>H NMR spectrum of the compound **3b** (500 MHz, CDCl<sub>3</sub>, TMS, δ = 0 ppm). \* Residual solvent peak: CDCl<sub>3</sub>, H<sub>2</sub>O.

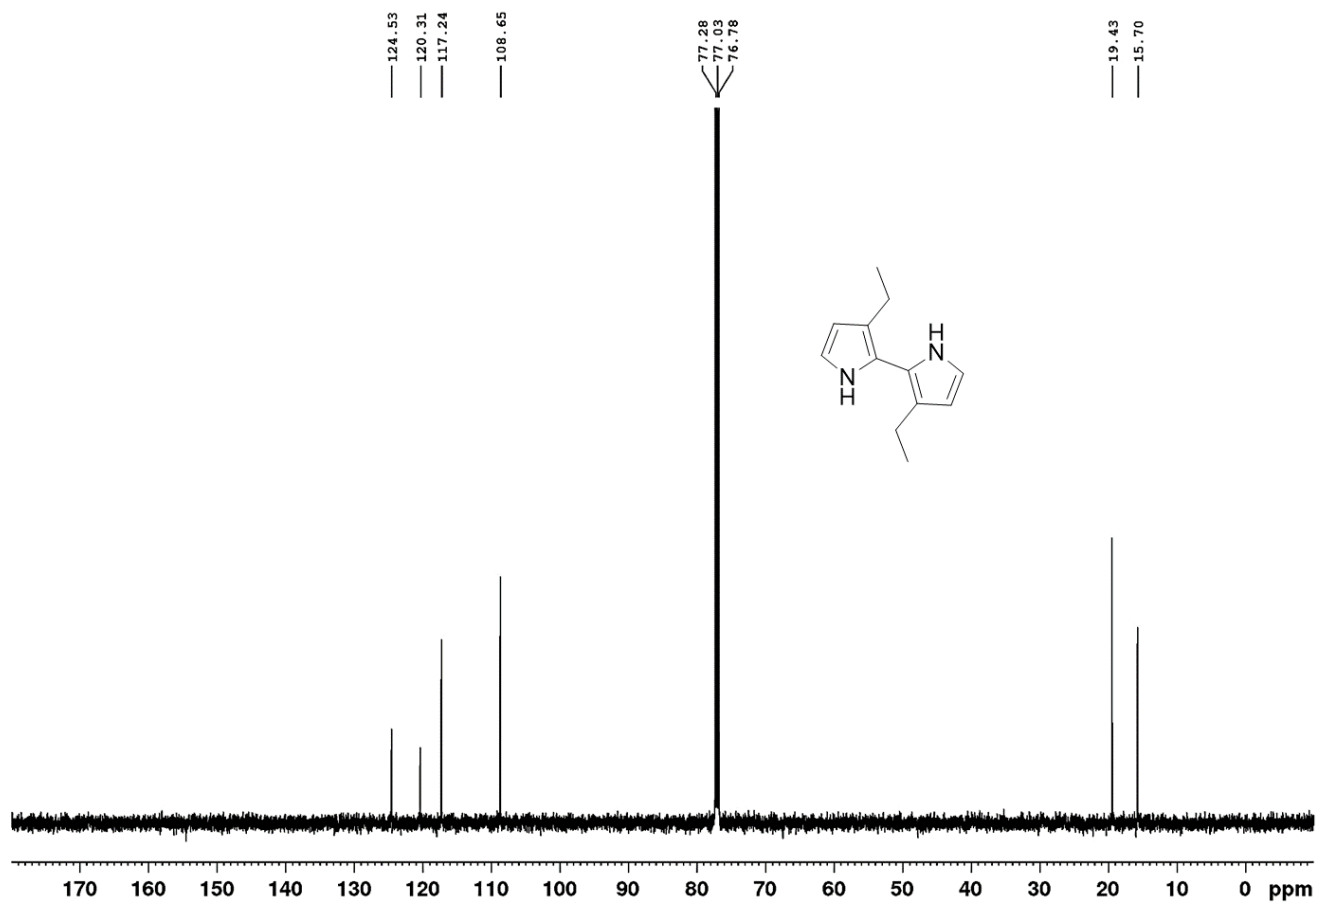

**Figure S35.**  $^{13}\text{C}$  NMR spectrum of the compound **3b** (126 MHz,  $\text{CDCl}_3$  ( $\delta = 77$  ppm)).

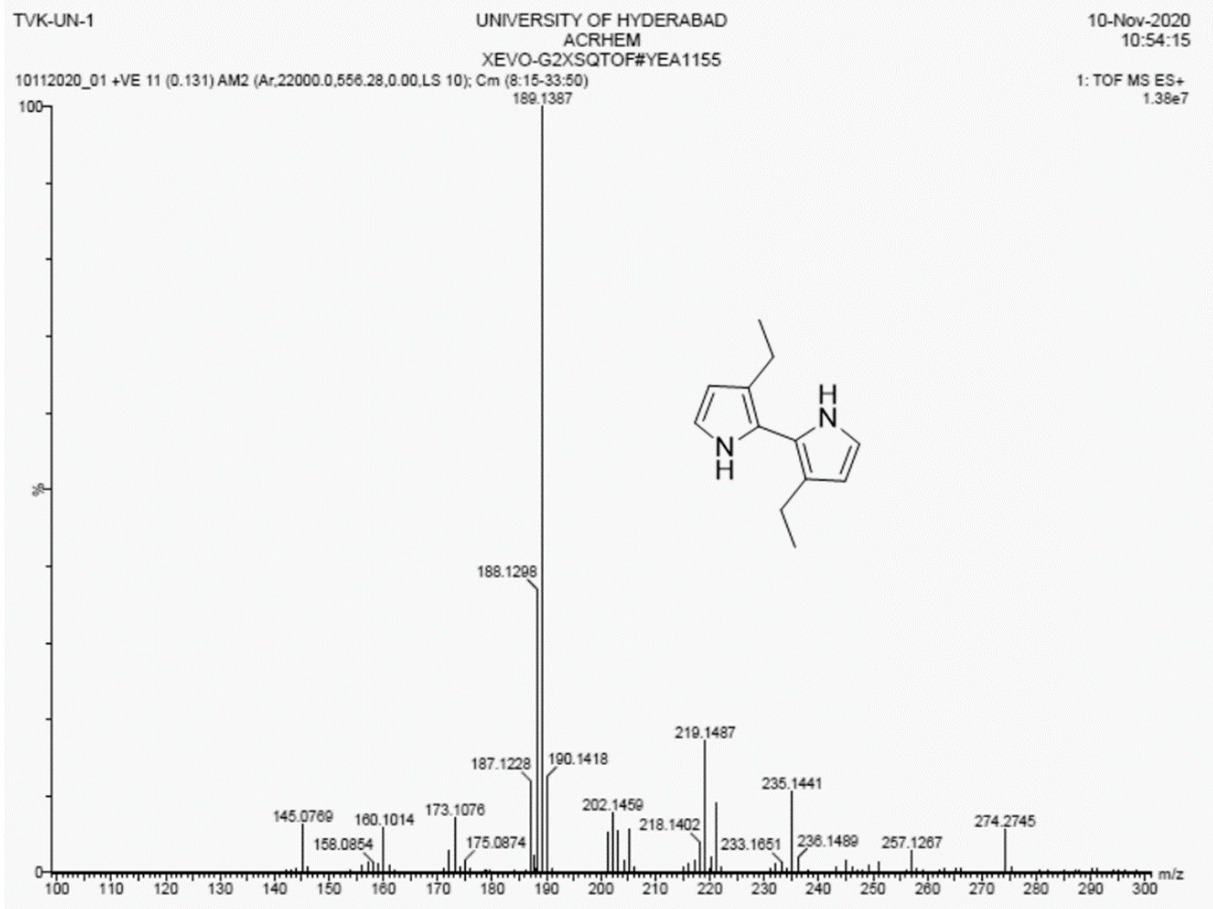

**Figure S36.** HRMS data of **3b**:  $[M+H]^+$  Calcd for  $C_{12}H_{17}N_2$ : 189.1391; found: 189.1387

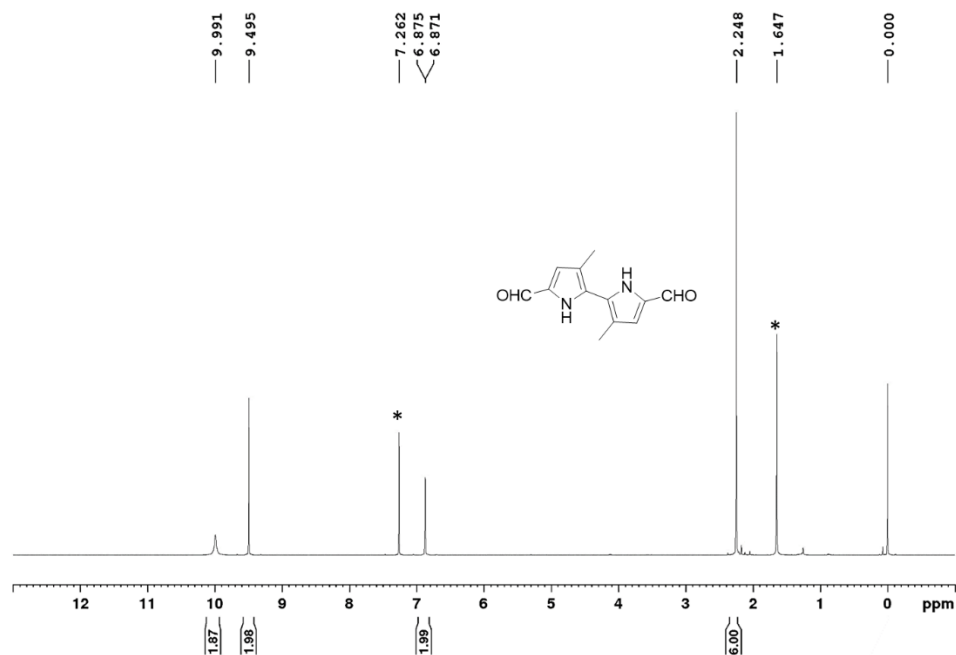

**Figure S37.** <sup>1</sup>H NMR spectrum of the compound **2a** (500 MHz, CDCl<sub>3</sub>, TMS, δ = 0 ppm) \* Residual solvent peak: CDCl<sub>3</sub>, H<sub>2</sub>O.

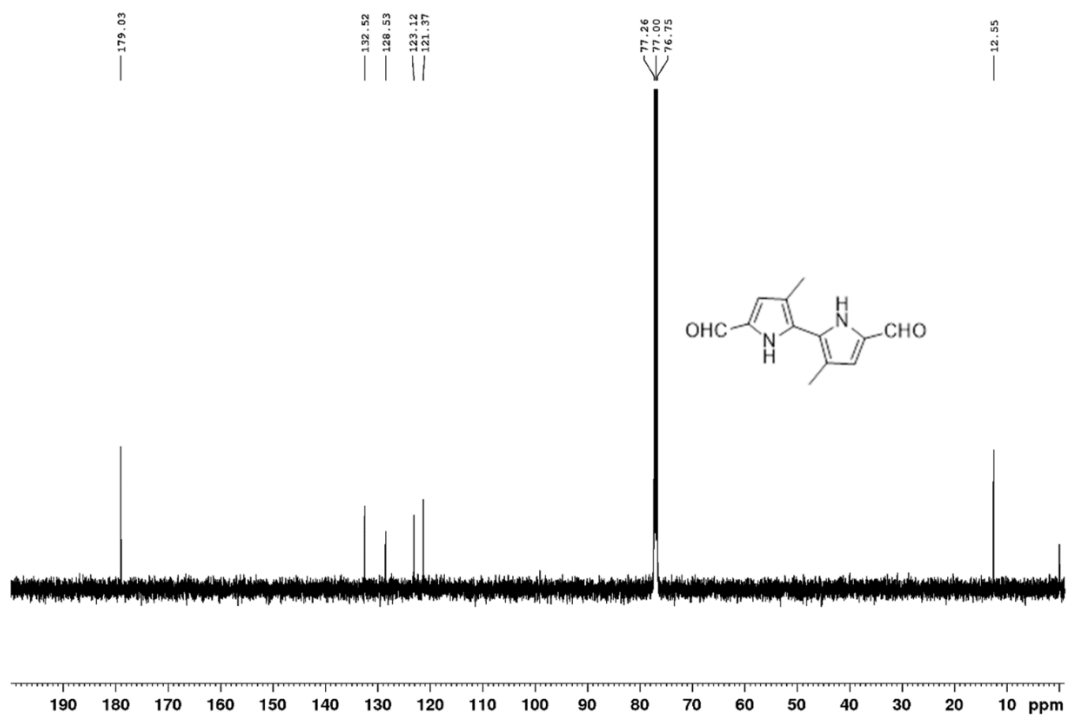

**Figure S38.** <sup>13</sup>C NMR spectrum of the compound **2a** (126 MHz, CDCl<sub>3</sub> (δ = 77 ppm)).

## Display Report

### Analysis Info

Analysis Name D:\Data\D\Data\Finaltest\2021\PROF.PKPJAN\JN-1-93-1R1.d  
Method tune\_low\_Pos-R2.m  
Sample Name JN-1-93-1  
Comment

Acquisition Date 1/29/2021 3:29:20 PM  
Operator BDAL@DE  
Instrument maXis 10138

### Acquisition Parameter

|             |            |                       |           |                  |           |
|-------------|------------|-----------------------|-----------|------------------|-----------|
| Source Type | ESI        | Ion Polarity          | Positive  | Set Nebulizer    | 0.3 Bar   |
| Focus       | Not active | Set Capillary         | 4200 V    | Set Dry Heater   | 180 °C    |
| Scan Begin  | 50 m/z     | Set End Plate Offset  | -500 V    | Set Dry Gas      | 5.0 l/min |
| Scan End    | 2580 m/z   | Set Collision Cell RF | 350.0 Vpp | Set Divert Valve | Waste     |

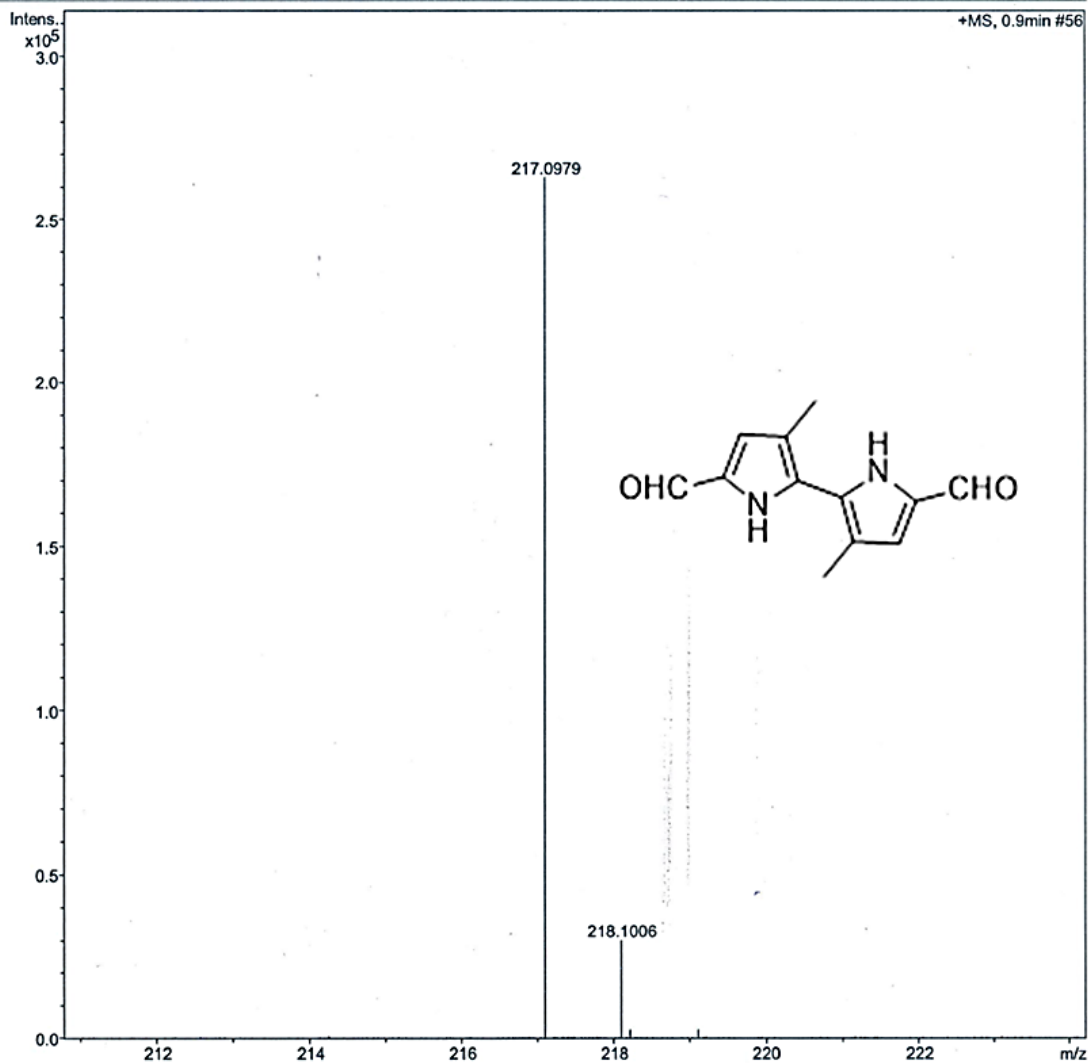

**Figure S39.** HRMS data of **2a**: [M+H]<sup>+</sup> Calcd for C<sub>12</sub>H<sub>13</sub>N<sub>2</sub>O<sub>2</sub>: 217.0977; found: 217.0979.

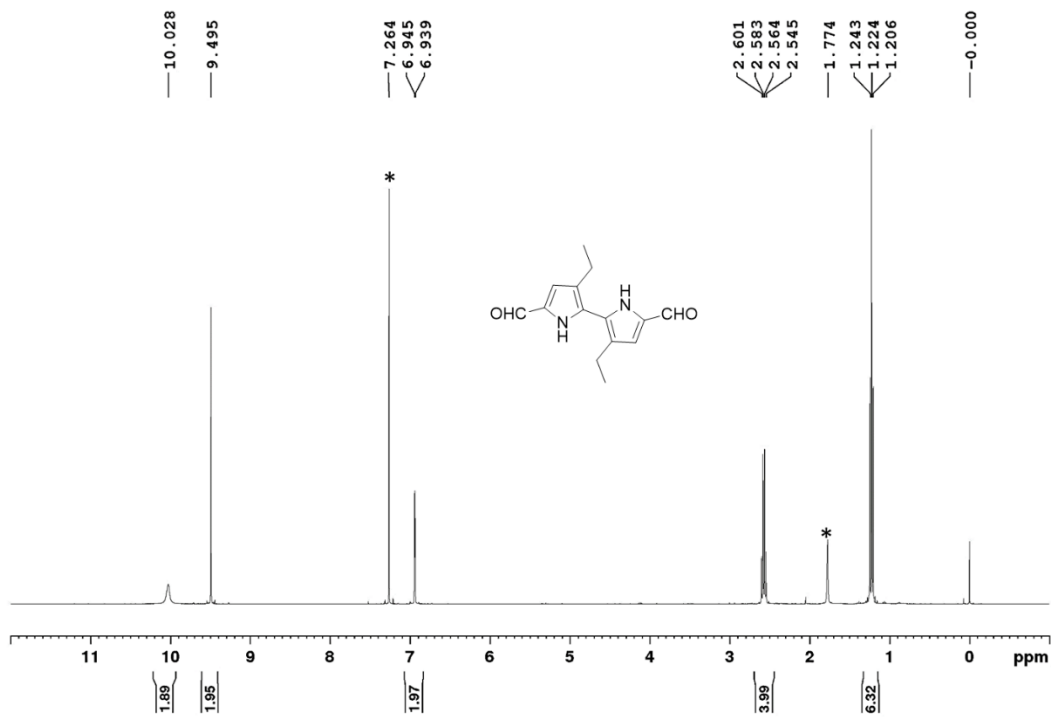

**Figure S40.**  $^1\text{H}$  NMR spectrum of the compound **2b** (500 MHz,  $\text{CDCl}_3$ , TMS,  $\delta = 0$  ppm). \* Residual solvent peak:  $\text{CDCl}_3$ ,  $\text{H}_2\text{O}$ .

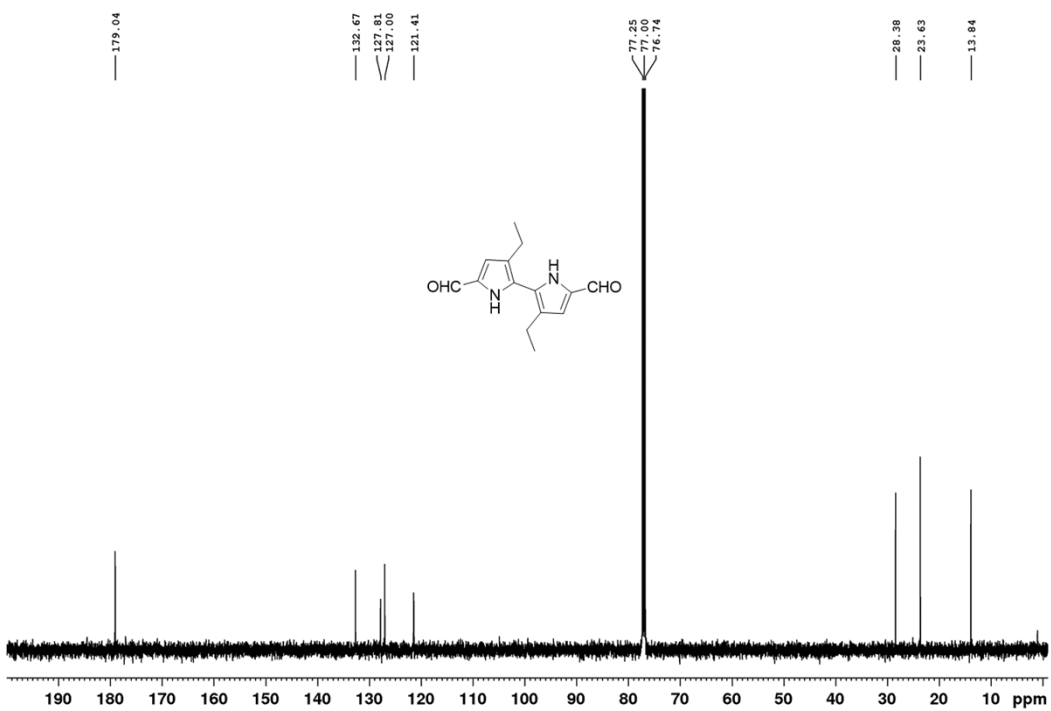

**Figure S41.**  $^{13}\text{C}$  NMR spectrum of the compound **2b** (126 MHz, ( $\delta = 77$  ppm)).



## Display Report

### Analysis Info

Analysis Name D:\Data\2022-DATA\PROF.PKPMAY\JN-.d  
Method tune\_low.m  
Sample Name JN-  
Comment

Acquisition Date 26-05-2022 12:55:11

Operator UOH  
Instrument maXis 255552.10138

### Acquisition Parameter

|             |            |                      |          |                  |           |
|-------------|------------|----------------------|----------|------------------|-----------|
| Source Type | ESI        | Ion Polarity         | Positive | Set Nebulizer    | 0.3 Bar   |
| Focus       | Not active | Set Capillary        | 2800 V   | Set Dry Heater   | 180 °C    |
| Scan Begin  | 20 m/z     | Set End Plate Offset | -500 V   | Set Dry Gas      | 4.0 l/min |
| Scan End    | 1500 m/z   | Set Charging Voltage | 0 V      | Set Divert Valve | Waste     |
|             |            | Set Corona           | 0 nA     | Set APCI Heater  | 0 °C      |

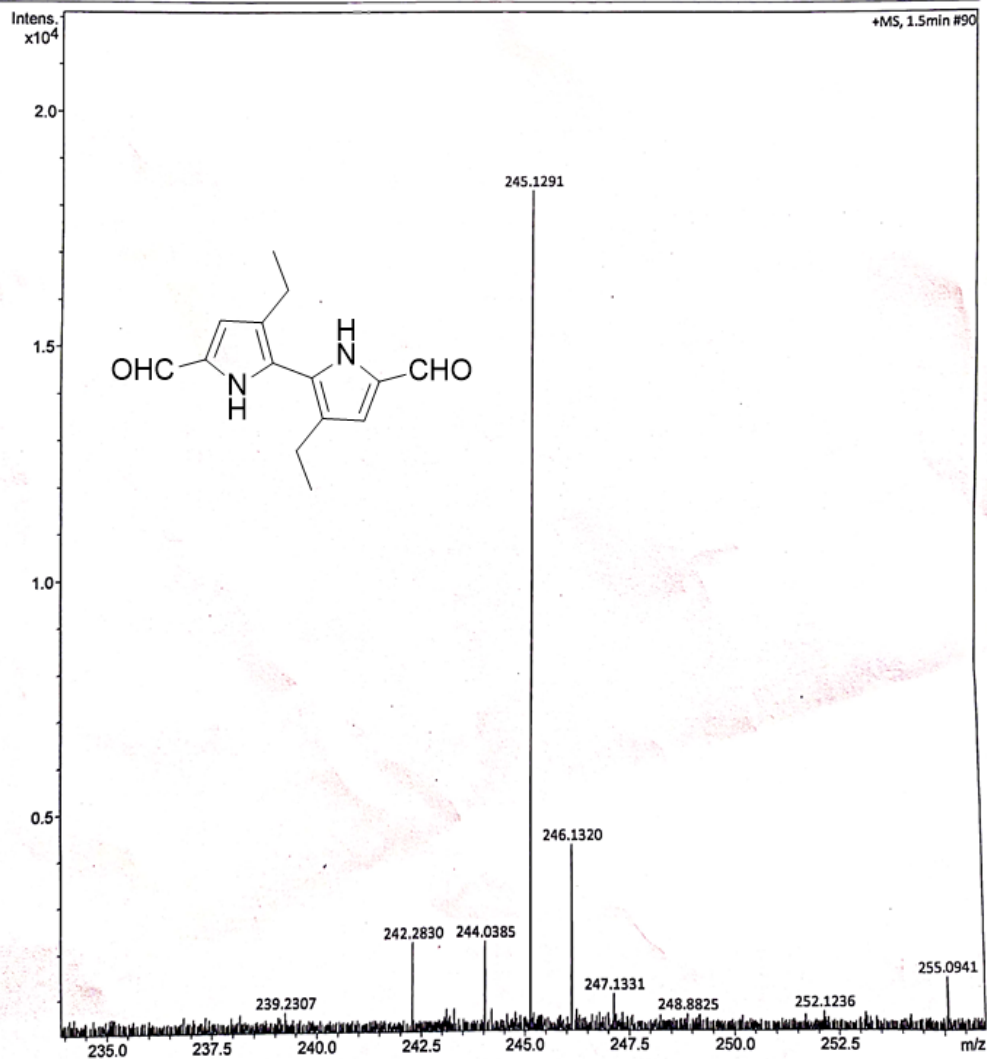

JN-.d

Bruker Compass DataAnalysis 4.2

printed: 26-05-2022 12:58:50

by: UOH

Page 1 of 1

**Figure S42.** HRMS data of compound **2b**:  $[M+H]^+$  Calcd for  $C_{14}H_{17}N_2O_2$ : 245.1290; found: 245.1291.

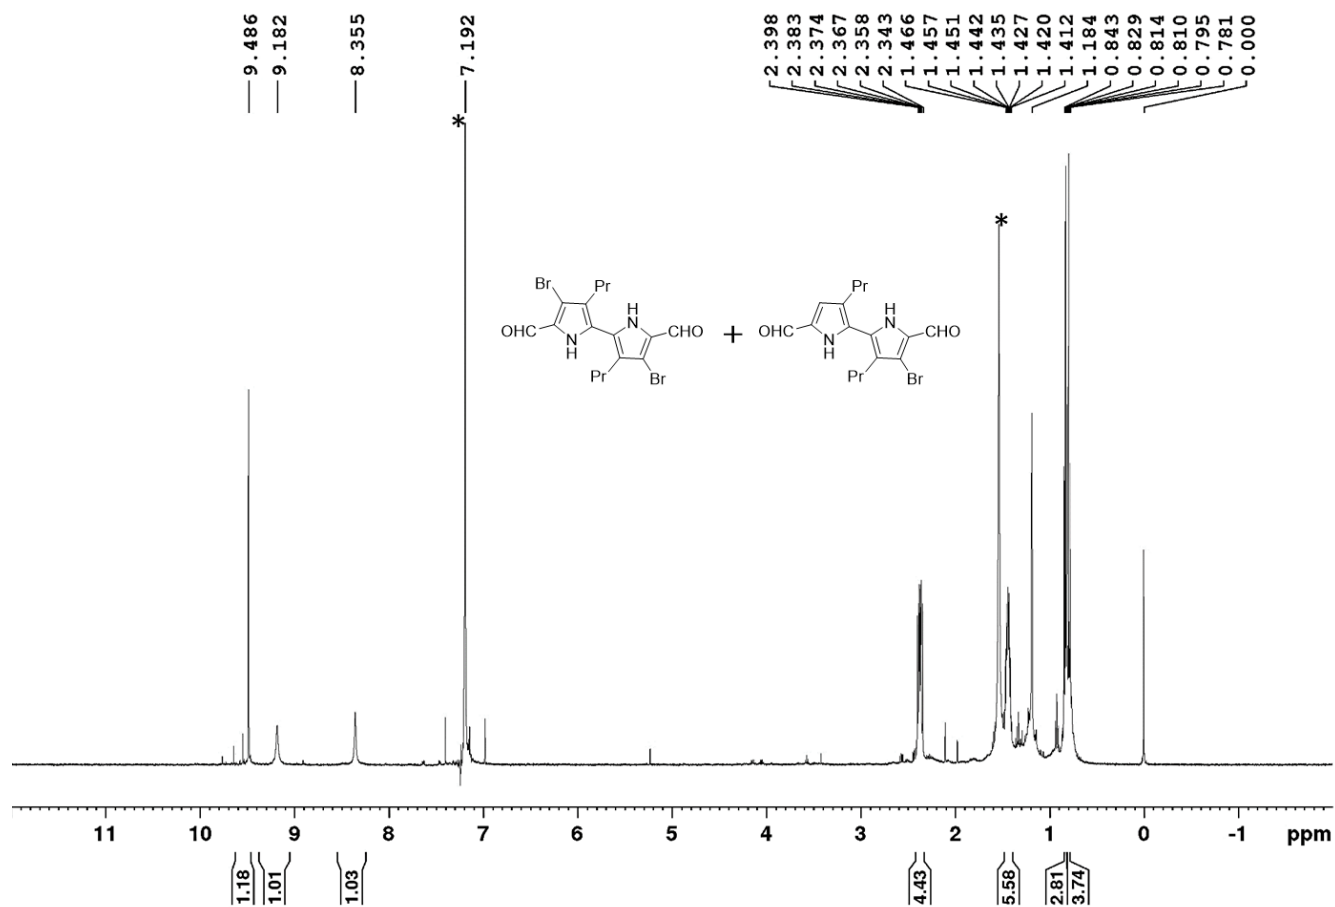

**Figure S43.**  $^1\text{H}$  NMR spectrum of the inseparable mixture of compounds **2c-Br** and **2c-Br'** (500 MHz,  $\text{CDCl}_3$ , TMS,  $\delta = 0$  ppm).

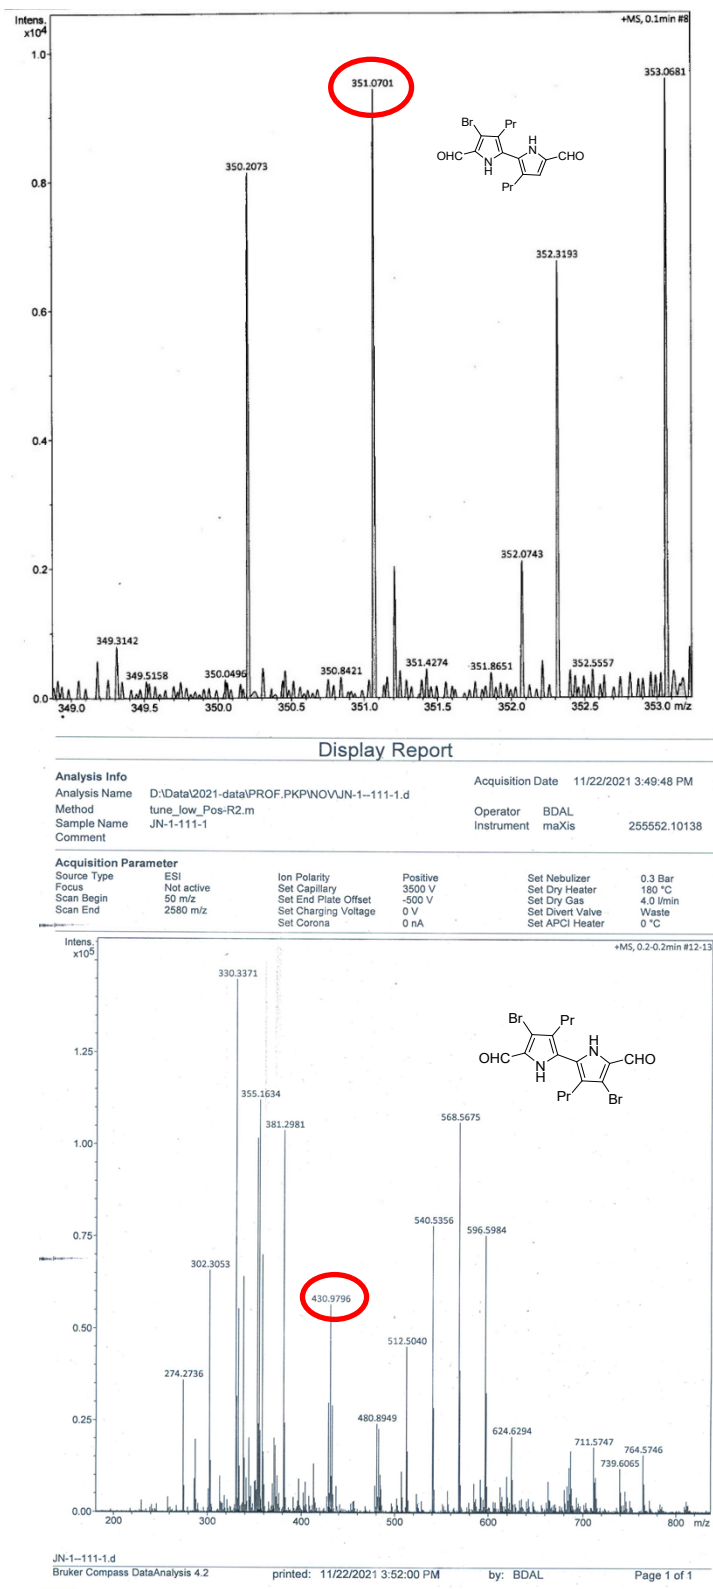

**Figure S44.** HRMS data of compound **2c-Br**:  $[M+H]^+$  Calcd for  $C_{16}H_{19}Br_2N_2O_2$ : 430.9793 found : 430.9796. **2c-Br'**:  $C_{16}H_{20}BrN_2O_2$ : 351.0708; found: 351.0701(top expanded and bottom full spectra).

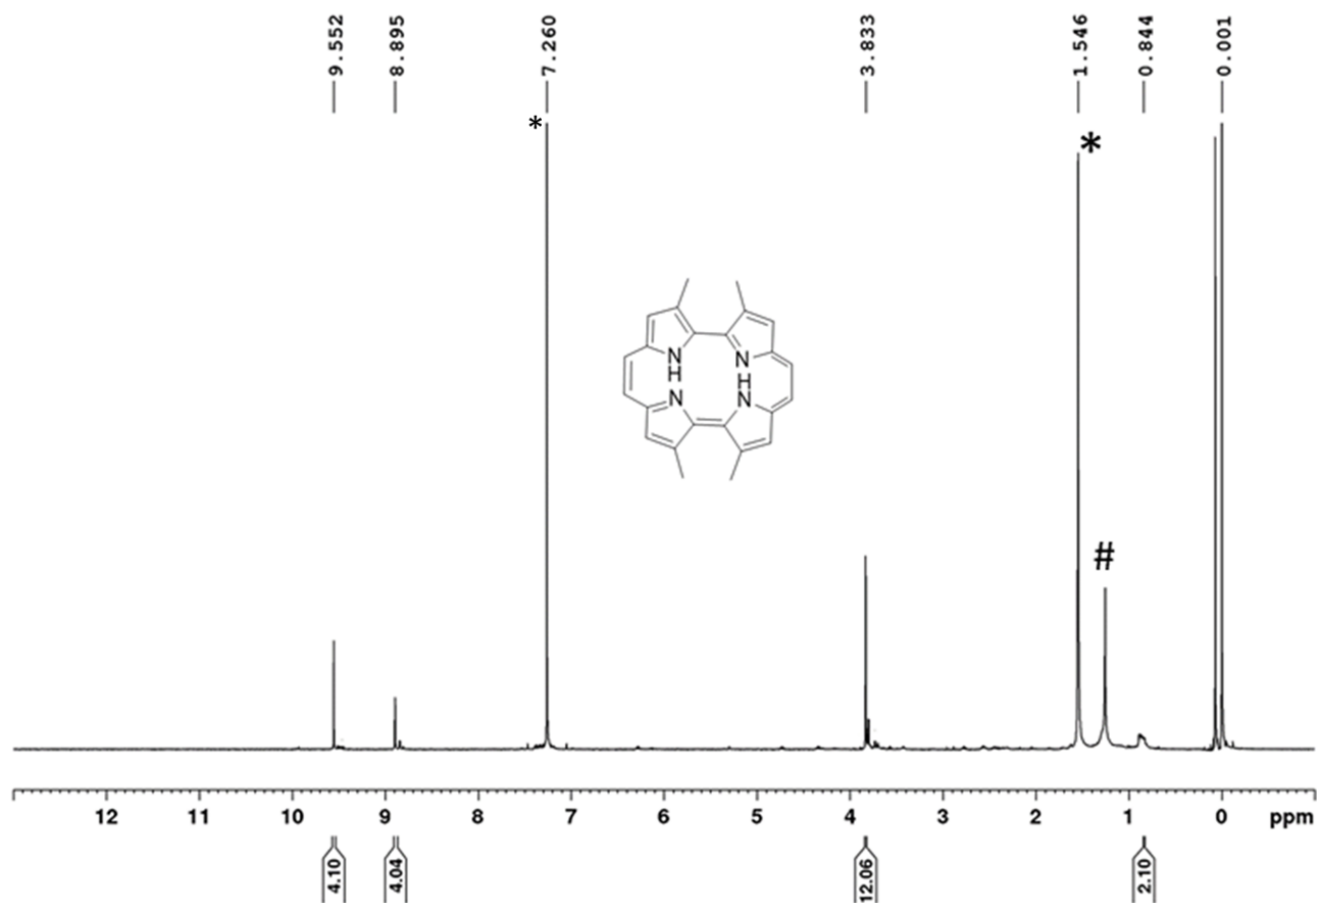

**Figure S45.** <sup>1</sup>H NMR spectrum of the compound **1a** (500 MHz, CDCl<sub>3</sub>, TMS, δ = 0 ppm). \* Residual solvent peak: CDCl<sub>3</sub>, H<sub>2</sub>O, # belongs to grease.

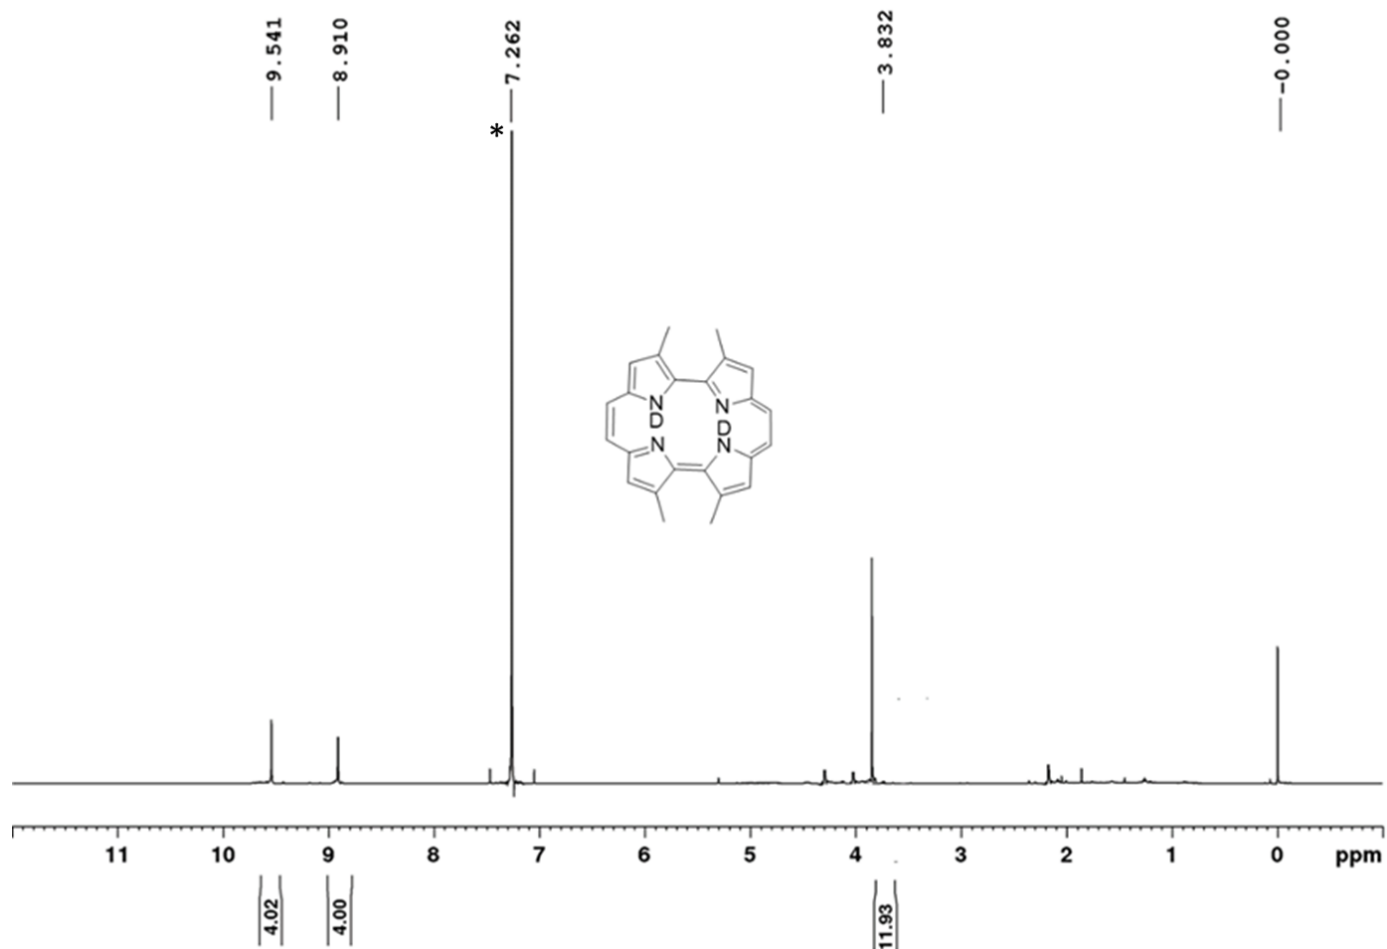

**Figure S46.** <sup>1</sup>H NMR spectrum of the compound **1a** after D<sub>2</sub>O exchange (500 MHz, CDCl<sub>3</sub>, TMS, δ = 0 ppm). \* Residual solvent peak: CDCl<sub>3</sub>.

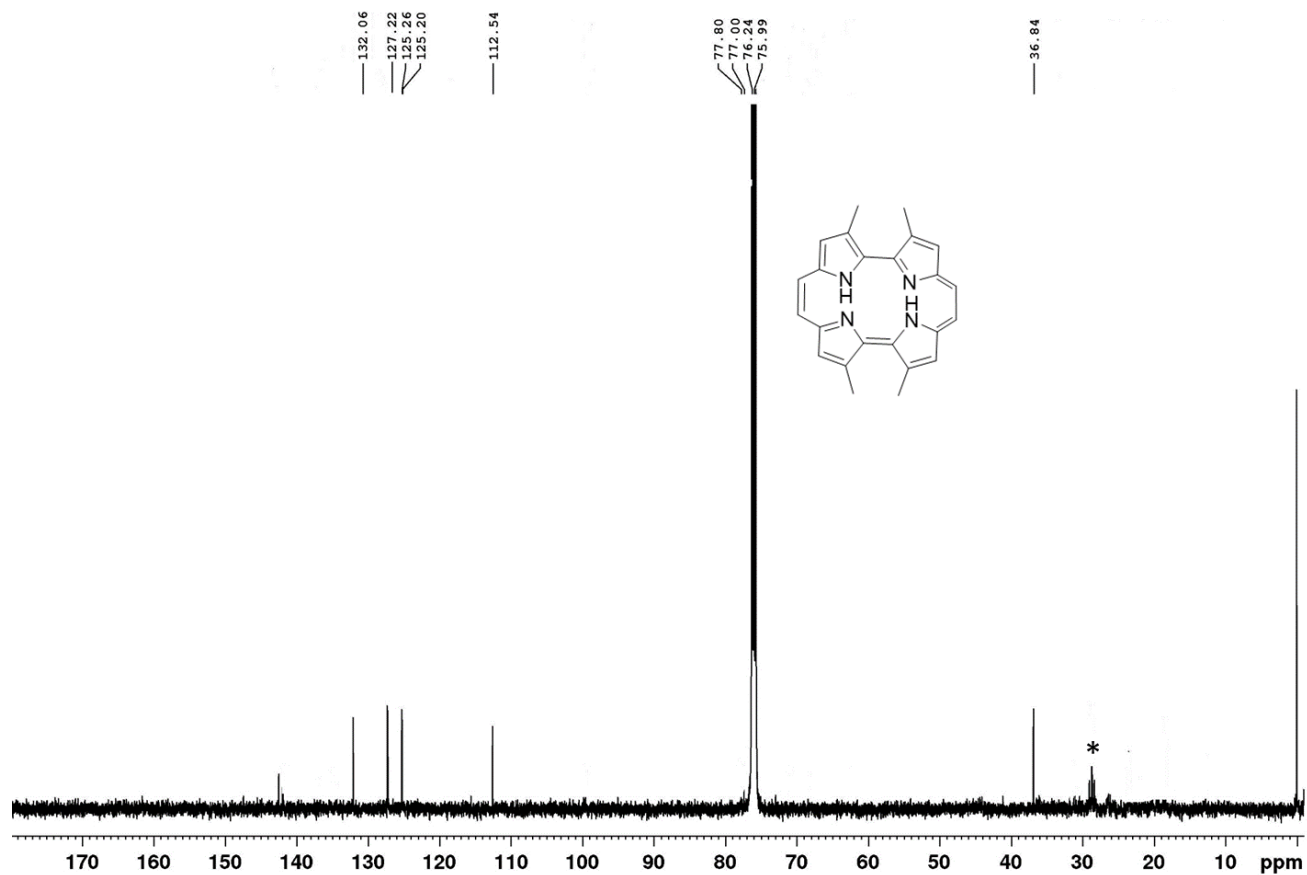

**Figure S47.**  $^{13}\text{C}$  NMR spectrum of the compound **1a** (126 MHz,  $\text{CDCl}_3$  ( $\delta = 77$  ppm)). \* grease.

## Display Report

**Analysis Info**  
Analysis Name D:\Data\DI\Data\Finaltest\2021\PROF.PKPV\FEB\JN-1-94-1-1R1.d Acquisition Date 2/17/2021 3:25:23 PM  
Method tune\_low\_Pos-R2.m Operator BDAL@DE  
Sample Name JN-1-94-1-1 Instrument maXis 10138  
Comment

**Acquisition Parameter**

|             |            |                       |           |                  |           |
|-------------|------------|-----------------------|-----------|------------------|-----------|
| Source Type | ESI        | Ion Polarity          | Positive  | Set Nebulizer    | 0.3 Bar   |
| Focus       | Not active | Set Capillary         | 4200 V    | Set Dry Heater   | 180 °C    |
| Scan Begin  | 50 m/z     | Set End Plate Offset  | -500 V    | Set Dry Gas      | 4.0 l/min |
| Scan End    | 2580 m/z   | Set Collision Cell RF | 350.0 Vpp | Set Divert Valve | Waste     |

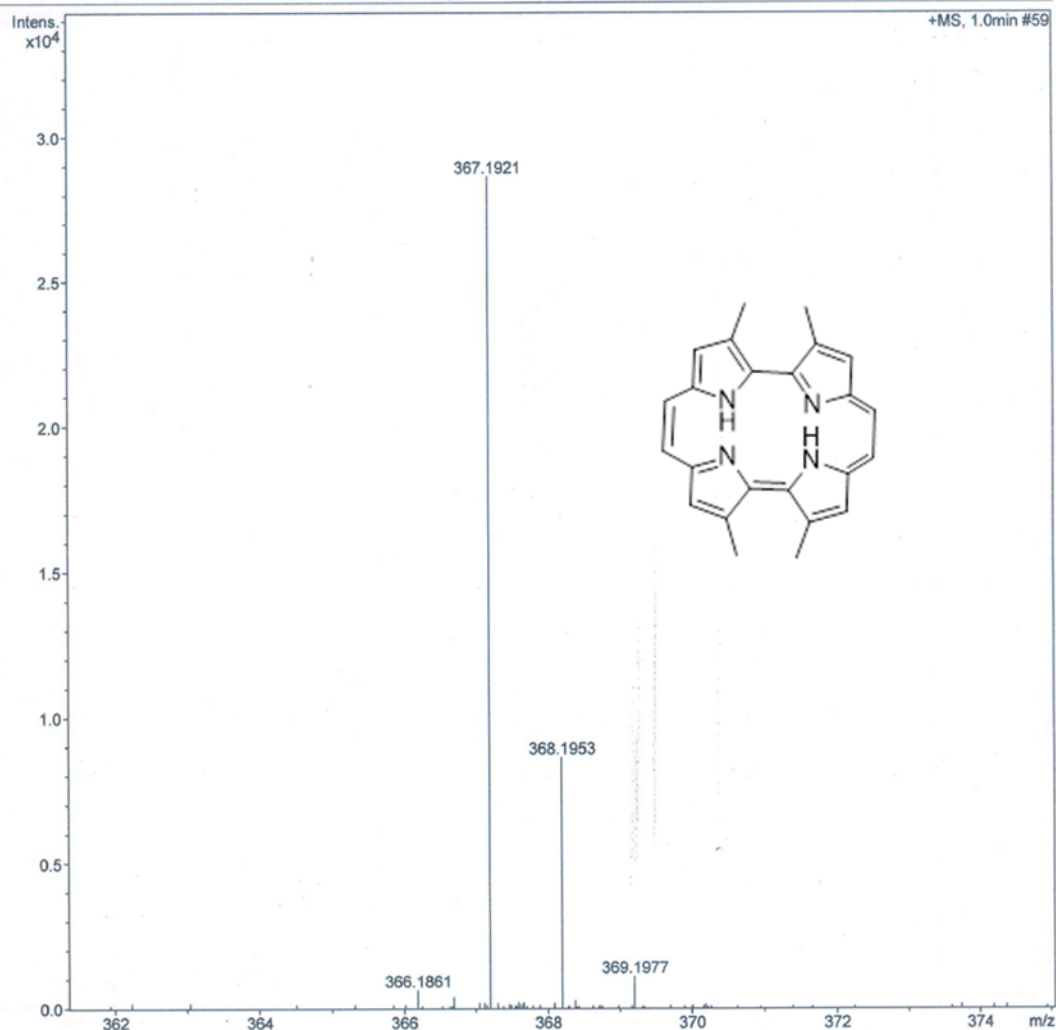

**Figure S48.** HRMS data of **1a**: [M+H]<sup>+</sup> Calcd for C<sub>24</sub>H<sub>23</sub>N<sub>4</sub>: 367.1922; found: 367.1921.

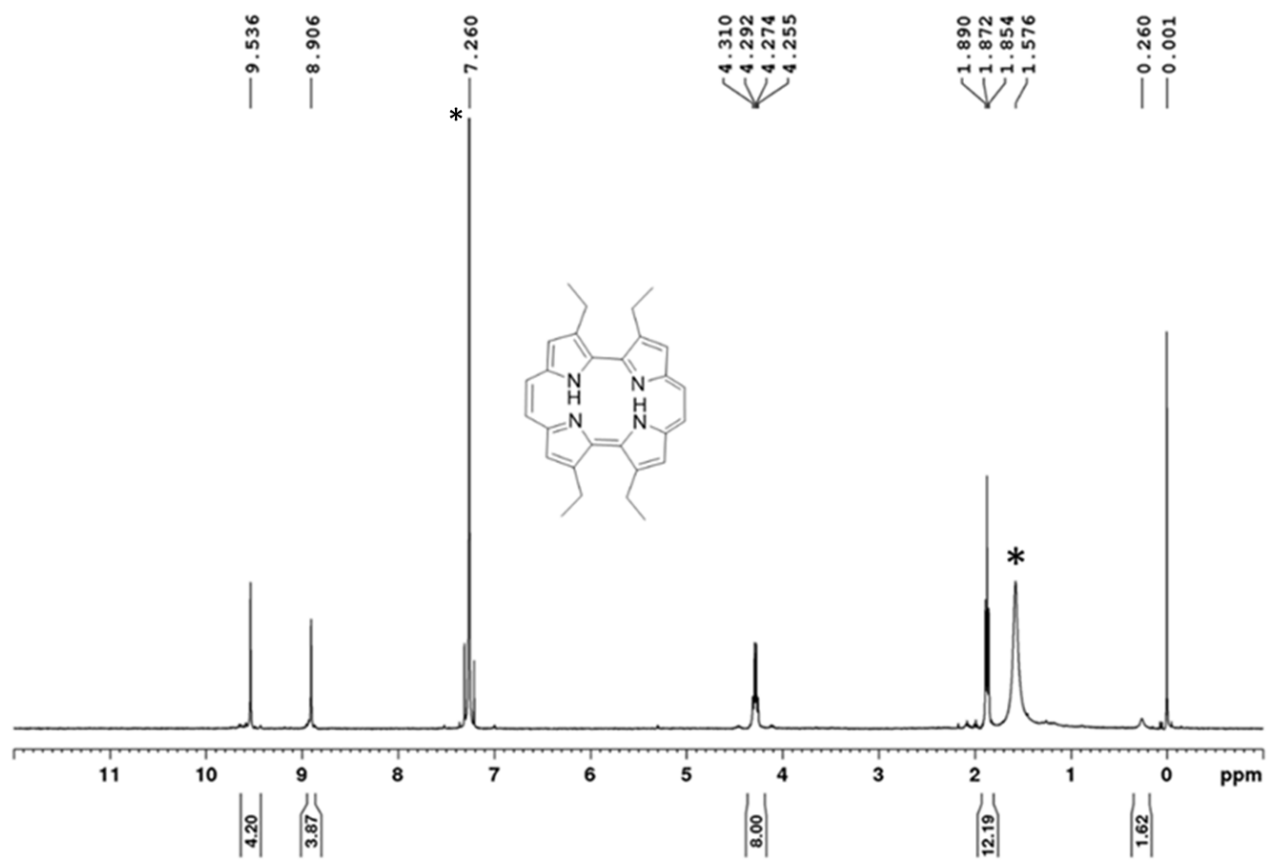

**Figure S49.** <sup>1</sup>H NMR spectrum of the compound **1b** (500 MHz, CDCl<sub>3</sub>, TMS, δ = 0 ppm). \* Residual solvent peak: CDCl<sub>3</sub>, H<sub>2</sub>O



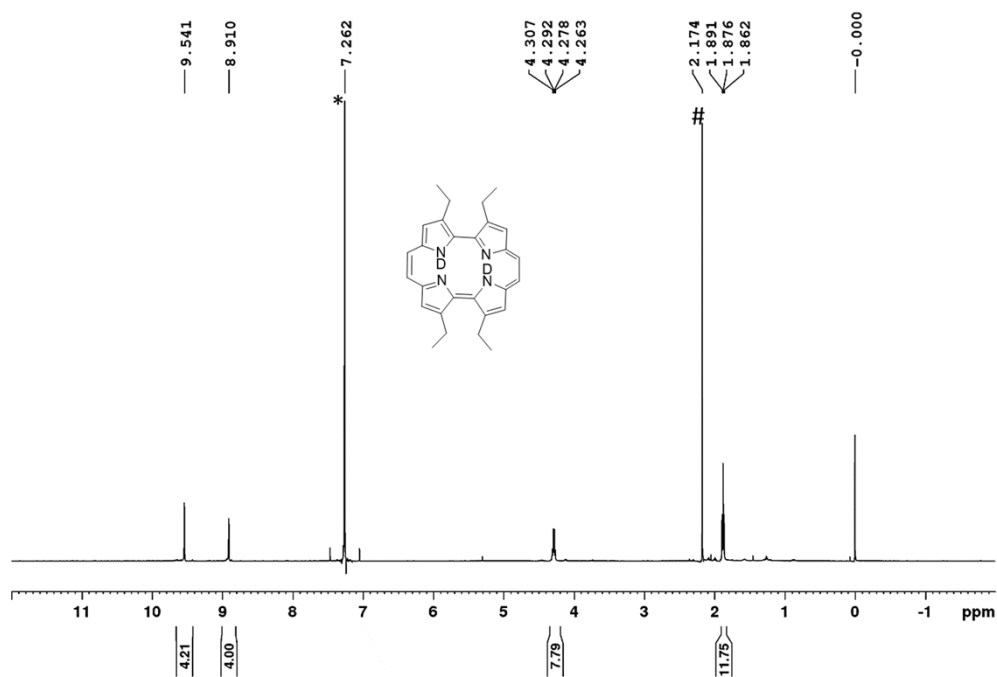

**Figure S50.** <sup>1</sup>H NMR spectrum of the compound **1b** after D<sub>2</sub>O exchange (500 MHz, CDCl<sub>3</sub>, TMS, δ = 0 ppm). \*Residual solvent peak: CDCl<sub>3</sub>, # acetone.

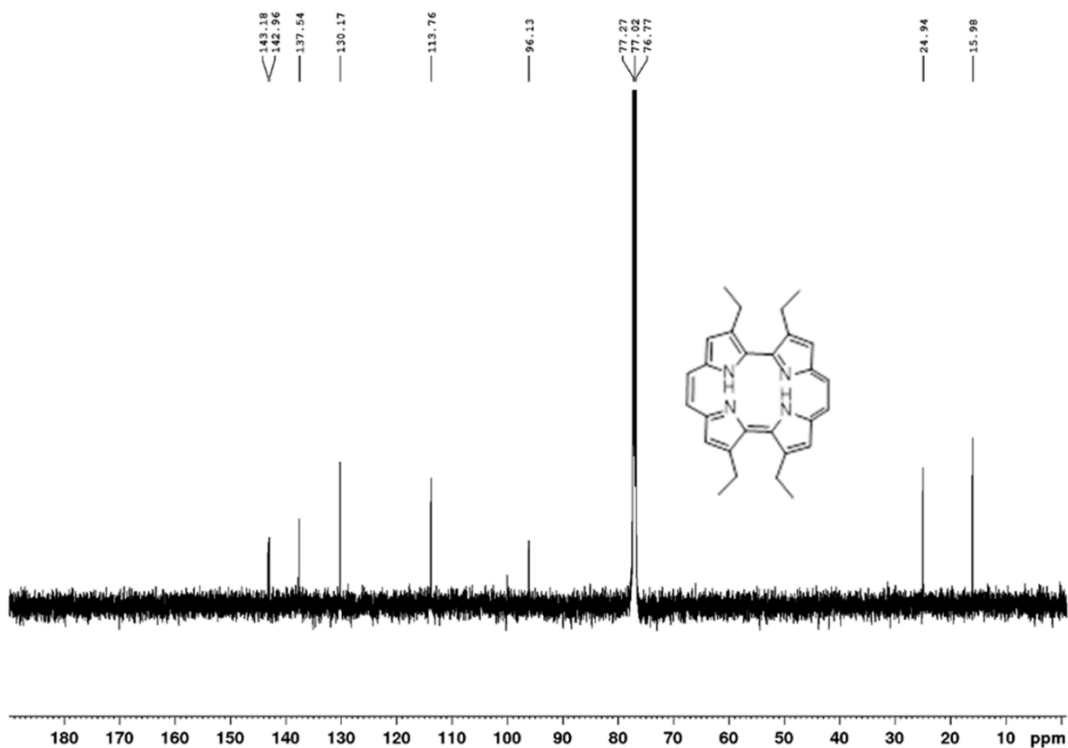

**Figure S51.** <sup>13</sup>C NMR spectrum of the compound **1b** (126 MHz, CDCl<sub>3</sub> (δ = 77 ppm)).

## Display Report

### Analysis Info

Analysis Name D:\Data\2019\PROF.PRS\AUGSTAD-ethyl-PO-1.d  
Method tune\_low\_Pos.m  
Sample Name AD-ethyl-PO  
Comment

Acquisition Date 8/6/2019 3:25:37 PM

Operator UOH-Chemistry  
Instrument maXis 10138

### Acquisition Parameter

|             |            |                       |           |                  |           |
|-------------|------------|-----------------------|-----------|------------------|-----------|
| Source Type | ESI        | Ion Polarity          | Positive  | Set Nebulizer    | 0.3 Bar   |
| Focus       | Not active | Set Capillary         | 4200 V    | Set Dry Heater   | 180 °C    |
| Scan Begin  | 50 m/z     | Set End Plate Offset  | -500 V    | Set Dry Gas      | 6.0 l/min |
| Scan End    | 1500 m/z   | Set Collision Cell RF | 350.0 Vpp | Set Divert Valve | Waste     |

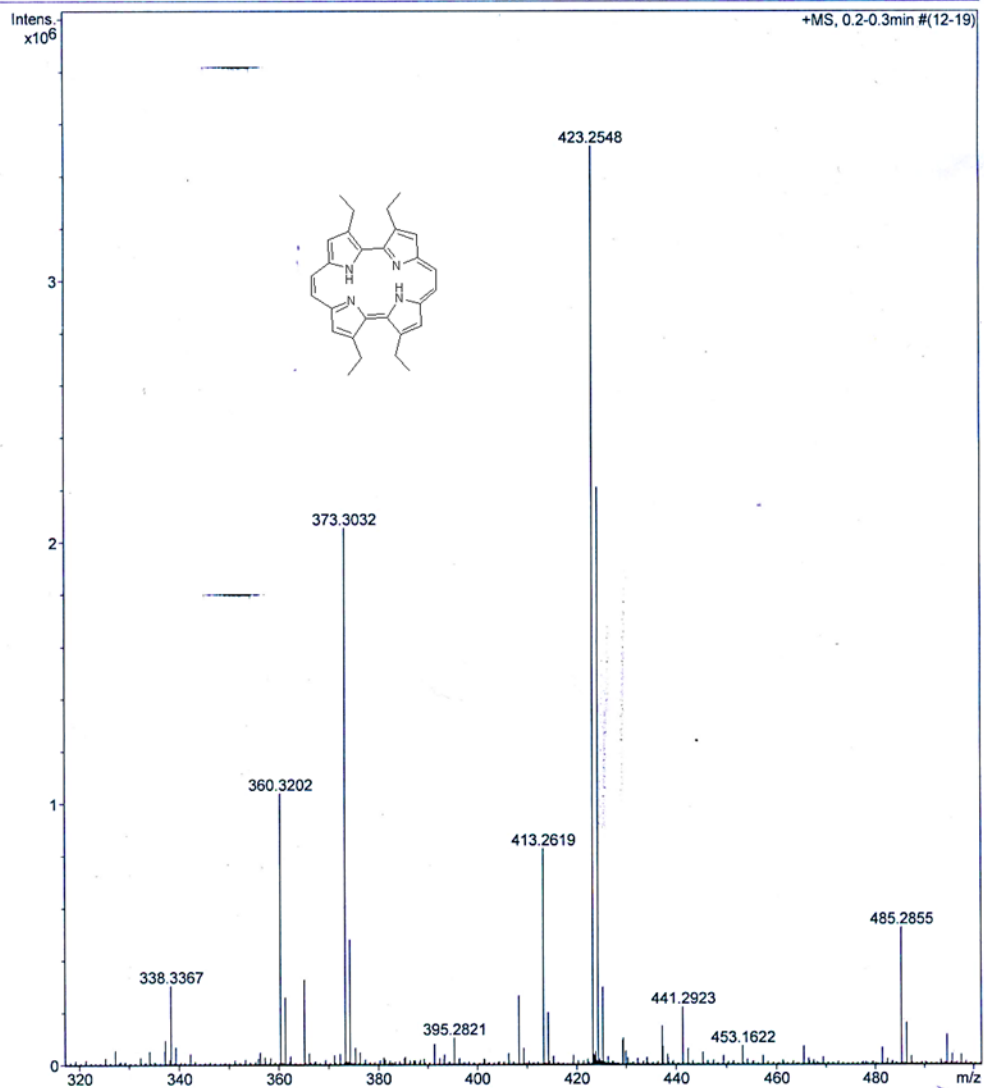

**Figure S52.** HRMS data of **1b**:  $[M+H]^+$  Calcd for  $C_{28}H_{31}N_4$ : 423.2549; found: 423.2548.

#### 4. CRYSTALLOGRAPHIC DATA

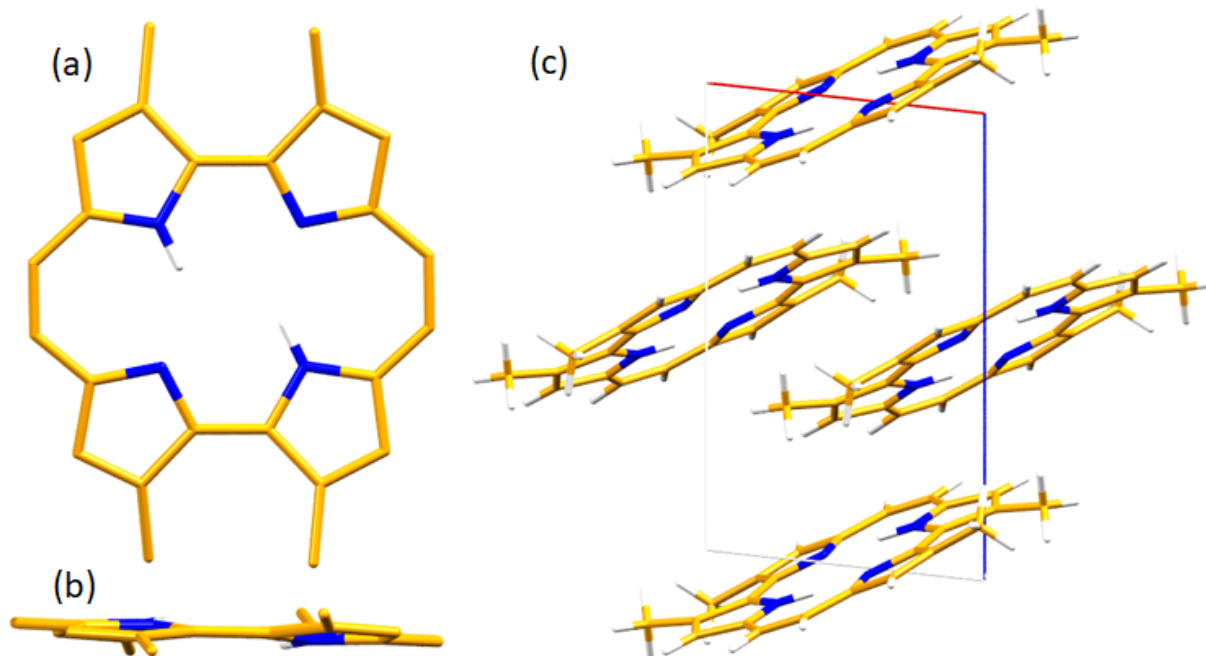

**Figure S53.** (a) Crystal structures of **1a** (a) top on, (b) side on view and (c) packing diagram viewed through b axis, Hydrogens are removed for clarity, except NH protons. Colour code: C, yellow; N, blue; H, white.

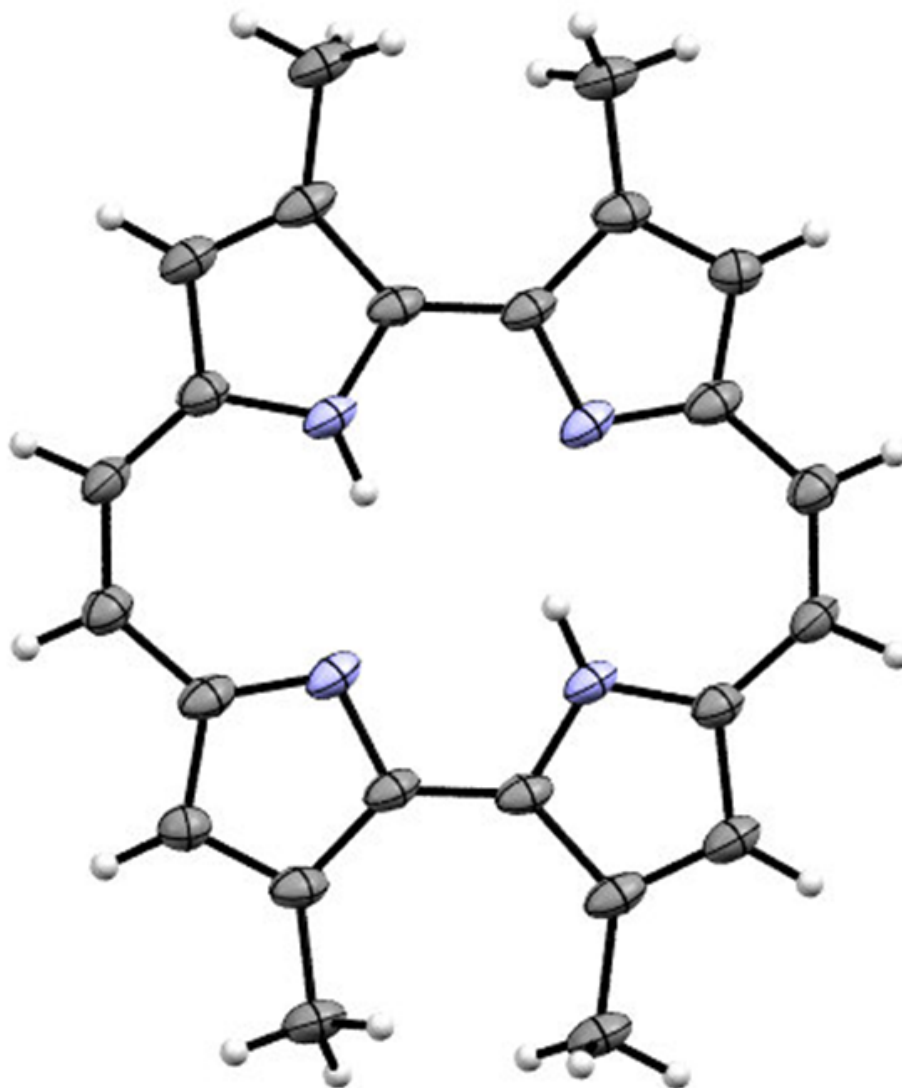

**Figure S54.** Thermal ellipsoid plot of crystal structure **1a** viewed at 50% probability level.

**Table S1** (Crystallographic parameters of **1a**):

|                             |                                                                                                          |
|-----------------------------|----------------------------------------------------------------------------------------------------------|
| Empirical formula           | $C_{24}H_{22}N_4$                                                                                        |
| Formula weight              | 366.45                                                                                                   |
| Temperature                 | 111(2)K                                                                                                  |
| Wavelength                  | 0.71073 Å                                                                                                |
| Crystal system, space group | Monoclinic $P2_1/n$                                                                                      |
| Unit cell dimensions        | a = 6.9895(3) alpha = 90 deg.<br>b = 10.9365(10) beta = 96.278(4) deg.<br>c = 11.6318(6) gamma = 90 deg. |

|                                   |                                                   |
|-----------------------------------|---------------------------------------------------|
| Volume                            | 883.81(10) Å <sup>3</sup>                         |
| Z, Calculated density             | 2, 1.377 Mg/m <sup>3</sup>                        |
| Absorption coefficient            | 0.083 mm <sup>-1</sup>                            |
| F(000)                            | 388                                               |
| 2Theta range for data collection  | 5.128 to 51.36 deg.                               |
| Limiting indices                  | -8 ≤ h ≤ 8, -13 ≤ k ≤ 13, -14 ≤ l ≤ 14            |
| Reflections collected / unique    | 5331 / 1587 [R <sub>int</sub> = 0.1059]           |
| Data / restraints / parameters    | 1587/0/129                                        |
| Goodness-of-fit on F <sup>2</sup> | 1.022                                             |
| Final R indices [I > 2σ(I)]       | R <sub>1</sub> = 0.0825, wR <sub>2</sub> = 0.2061 |
| R indices (all data)              | R <sub>1</sub> = 0.1170, wR <sub>2</sub> = 0.2514 |
| Extinction coefficient            | n/a                                               |
| Largest diff. peak and hole       | 0.37 and -0.47 e.Å <sup>-3</sup>                  |

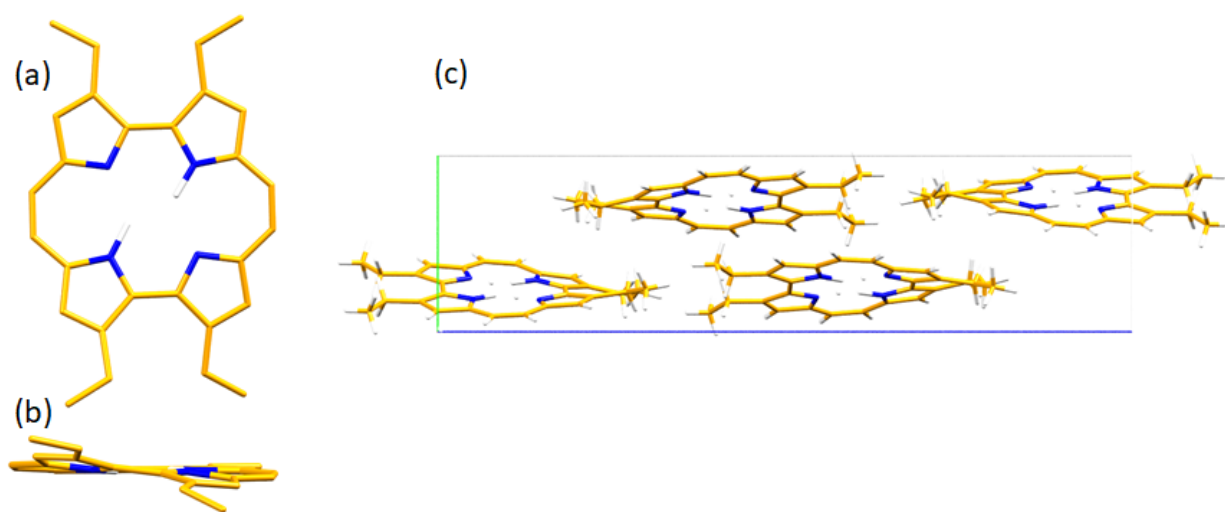

**Figure S55.** (a) Crystal structures of **1b** (a) top on, (b) side on view, Hydrogens are removed for clarity, except NH protons and (c) packing diagram viewed through a axis. Colour code: C, yellow; N, blue; H, white.

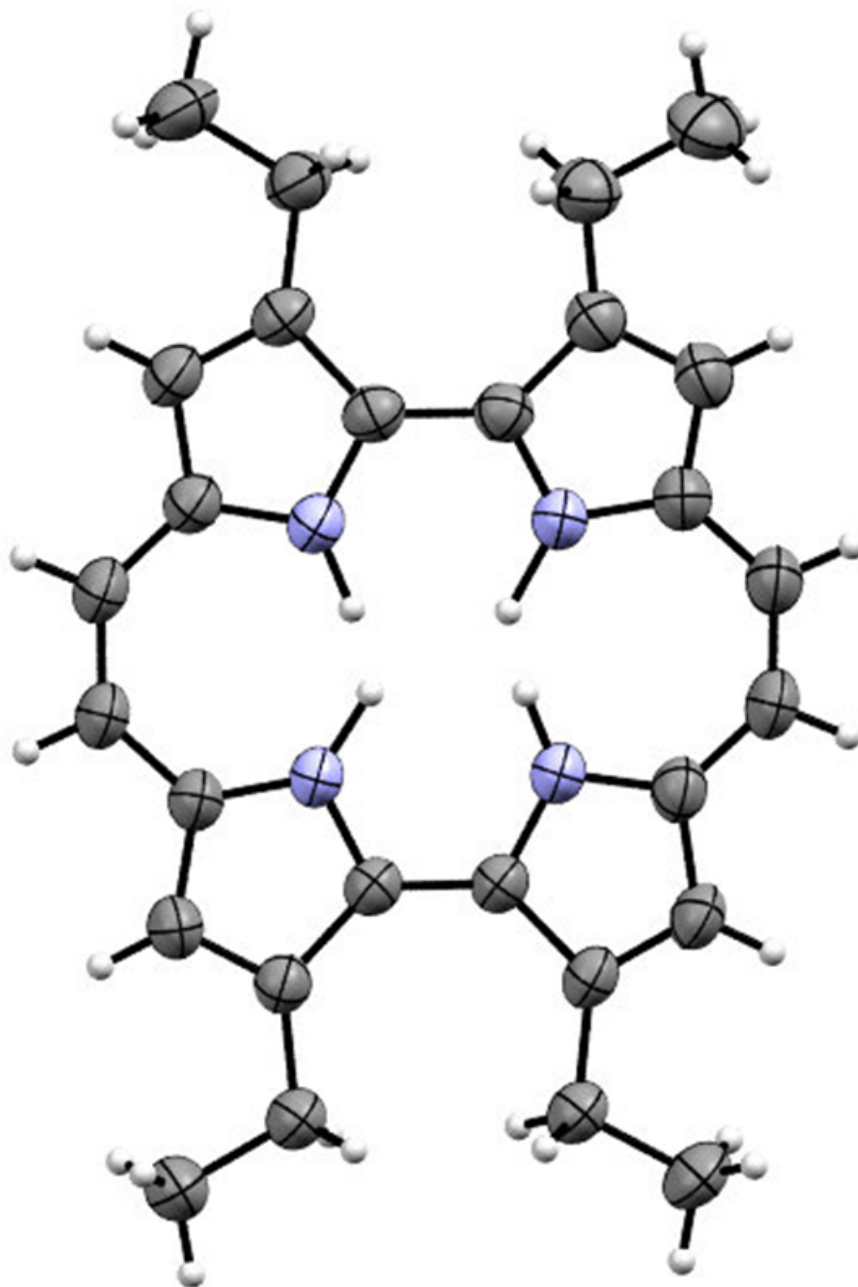

**Figure S56.** Thermal ellipsoid plot of crystal structure **1b** viewed at 50% probability level.

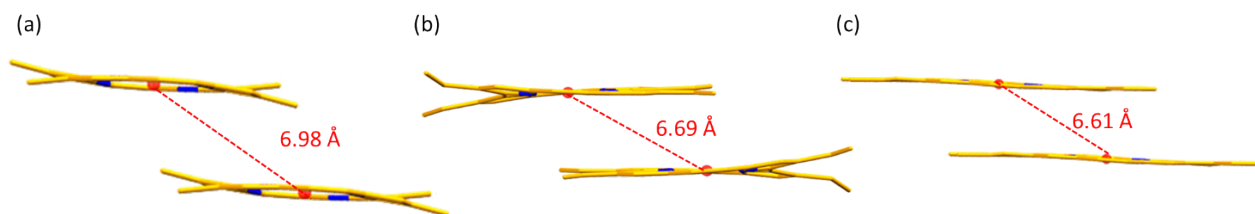

**Figure S57.** Centroid-centroid distance of (a) **1a**, (b) **1b** and (c) **1c**.

**Table S2** (Crystallographic parameters of **1b**):

|                                   |                                                                                                         |
|-----------------------------------|---------------------------------------------------------------------------------------------------------|
| Empirical formula                 | $C_{28}H_{30}N_4$                                                                                       |
| Formula weight                    | 422.56                                                                                                  |
| Temperature                       | 293(2) K                                                                                                |
| Wavelength                        | 0.71073 Å                                                                                               |
| Crystal system, space group       | Monoclinic $P2_1/c$                                                                                     |
| Unit cell dimensions              | a = 9.8726(4) alpha = 90 deg.<br>b = 7.4607(3) beta = 96.255(4) deg.<br>c = 29.6443(12) gamma = 90 deg. |
| Volume                            | 2170.50(15) Å <sup>3</sup>                                                                              |
| Z, Calculated density             | 4, 1.293 Mg/m <sup>3</sup>                                                                              |
| Absorption coefficient            | 0.077 mm <sup>-1</sup>                                                                                  |
| F(000)                            | 904                                                                                                     |
| 2Theta range for data collection  | 4.15 to 53.834 deg.                                                                                     |
| Limiting indices                  | -12<=h<=12, -9<=k<=9, -37<=l<=36                                                                        |
| Reflections collected / unique    | 16271/ 4467 [R(int) = 0.0730]                                                                           |
| Data / restraints / parameters    | 4467 / 0 / 310                                                                                          |
| Goodness-of-fit on F <sup>2</sup> | 0.923                                                                                                   |
| Final R indices [I>2sigma(I)]     | R1 = 0.0599, wR2 = 0.1308                                                                               |
| R indices (all data)              | R1 = 0.1244, wR2 = 0.1630                                                                               |
| Extinction coefficient            | n/a                                                                                                     |
| Largest diff. peak and hole       | 0.494 and -0.195 e.Å <sup>-3</sup>                                                                      |

## 5. PHOTOPHYSICAL DATA:

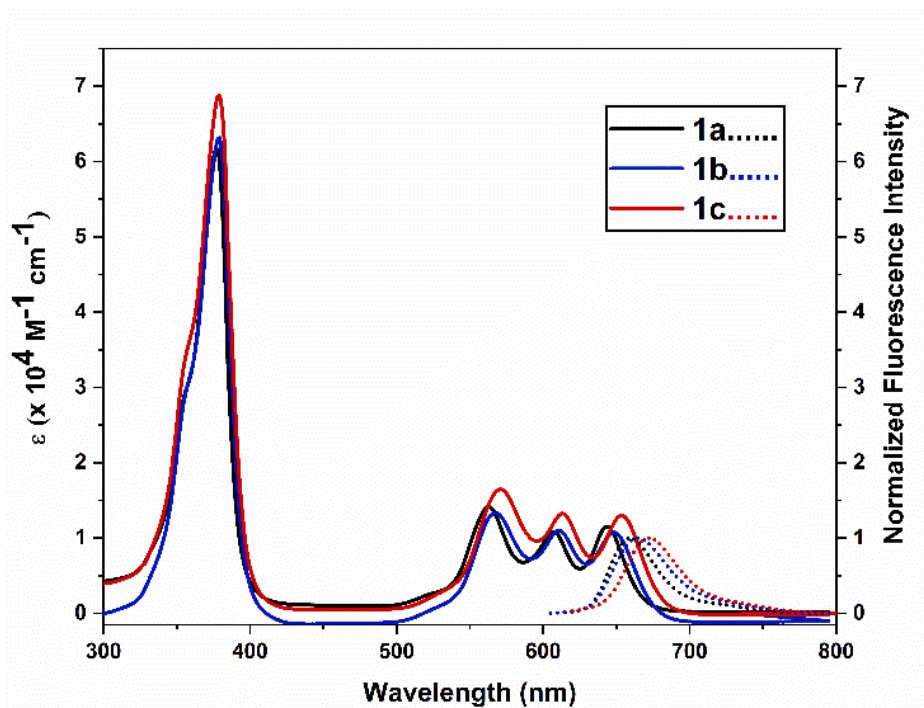

**Figure S58.** The overlay diagram of UV-vis (bold line) and Fluorescence spectra (dash dot line) of **1a** and **1b** in chloroform at rt.

**Table S3:** Fluorescence quantum yield and emission maxima ( $\lambda_{\max}$ ) at  $\lambda_{\text{exc}}$  (557 nm) in chloroform (25 °C).

| Samples   | Fluorescence<br>$\lambda_{\max}$ (nm) | $\Phi_f$ |
|-----------|---------------------------------------|----------|
| <b>1a</b> | 660                                   | 0.11     |
| <b>1b</b> | 665                                   | 0.12     |
| <b>1c</b> | 672                                   | 0.062    |



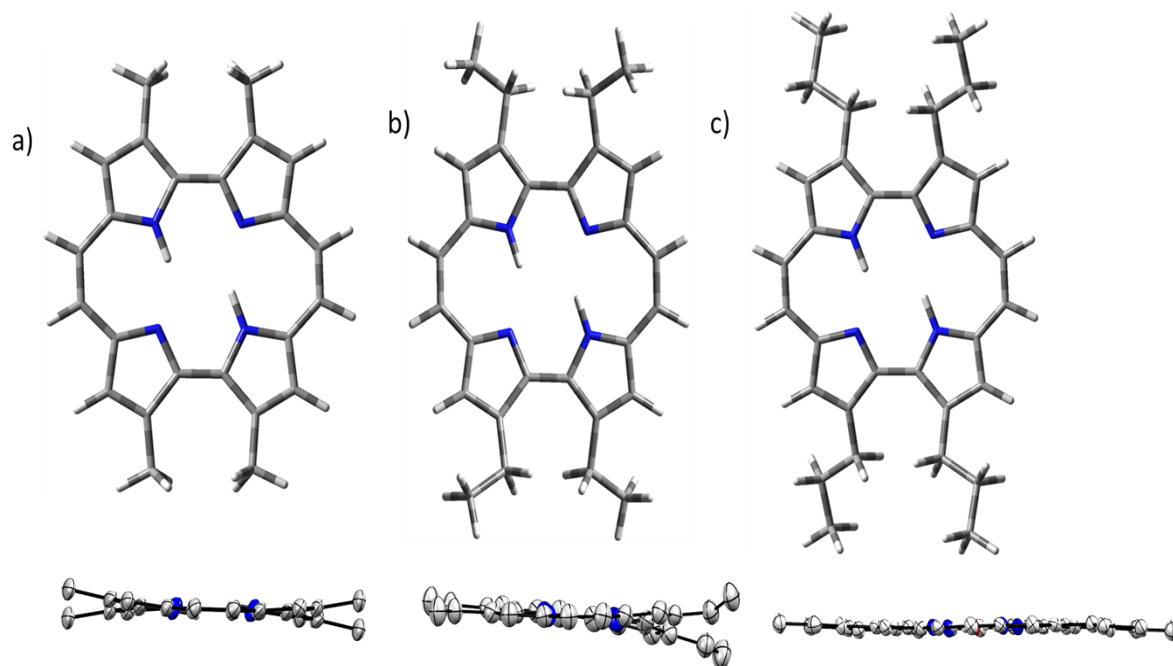

**Figure 59:** DFT-Optimized structures of (a) **1a** (b) **1b** and (c) **1c** calculated at B3LYP/6-31G+(D, P).

**Table S4 :** Structure and energy parameters of tetraalkylporphycenes and its interaction with TFA.

| Compound       | Ground state energy, E (eV) | $\Theta$ (N-C-C-NH) (deg) | r, N $\cdots$ H-N (Å) | r, O-H (TFA) (Å) | r, N $\cdots$ H-O (Å) |
|----------------|-----------------------------|---------------------------|-----------------------|------------------|-----------------------|
| <b>1a</b>      | -1146.87                    | 5.778, 5.779              | 1.890                 | -                | -                     |
| <b>1b</b>      | -1304.13                    | 12.542, 12.544            | 1.876                 | -                | -                     |
| <b>1c</b>      | -1461.40                    | 12.634, 12.640            | 1.893                 | -                | -                     |
| <b>1a.2TFA</b> | -2200.54                    | 15.747, 16.151            | 1.921                 | 1.007            | 1.792                 |
| <b>1b.2TFA</b> | -2357.81                    | 19.211, 19.214            | 1.936                 | 1.011            | 1.764                 |
| <b>1c.2TFA</b> | -2515.08                    | 19.376, 20.095            | 1.932, 1.926          | 1.009/1.016      | 1.773/1.720           |

**Table S5:** Coordinates of optimized geometry of **1a**:

| Label | Symbol | X        | Y        | Z        |
|-------|--------|----------|----------|----------|
| 1     | N      | -1.37263 | 1.349913 | 0.07403  |
| 2     | N      | -1.44312 | -1.39425 | -0.06388 |
| 3     | H      | -0.48703 | -1.00801 | -0.09892 |
| 4     | C      | -2.58935 | 0.73168  | 0.00906  |
| 5     | C      | -1.61183 | 2.689301 | 0.06505  |
| 6     | C      | -2.62744 | -0.69203 | 0.00043  |
| 7     | C      | -3.07646 | -2.91762 | 0.01738  |
| 8     | H      | -3.5763  | -3.87678 | 0.05868  |
| 26    | N      | 1.372626 | -1.34991 | -0.07403 |
| 27    | N      | 1.443123 | 1.39425  | 0.06386  |
| 28    | H      | 0.487029 | 1.00801  | 0.09889  |
| 29    | C      | 2.589345 | -0.73168 | -0.00907 |
| 30    | C      | 1.611833 | -2.6893  | -0.06506 |
| 31    | C      | 2.627442 | 0.69203  | -0.00043 |
| 32    | C      | 3.076457 | 2.91761  | -0.01738 |
| 33    | H      | 3.576298 | 3.87678  | -0.05868 |
| 34    | C      | 1.666271 | 2.74221  | 0.06043  |

|    |   |              |          |              |  |  |  |          |              |              |
|----|---|--------------|----------|--------------|--|--|--|----------|--------------|--------------|
| 9  | C | -1.66627     | -2.74222 | -0.06044     |  |  |  | 6        | 1            |              |
| 10 | C | 0.71195<br>1 | 3.772446 | 0.10244<br>5 |  |  |  | -0.71195 | -3.77245     | -0.10245     |
| 11 | H | 1.15733<br>8 | 4.764215 | 0.11622<br>2 |  |  |  | -1.15734 | -4.76422     | -0.11623     |
| 12 | C | -3.67062     | 1.73087  | -0.06472     |  |  |  | 3.670616 | -1.73087     | 0.06472<br>2 |
| 13 | C | -0.67639     | 3.744956 | 0.10398<br>6 |  |  |  | 0.676385 | -3.74496     | -0.10399     |
| 14 | H | -1.14307     | 4.72757  | 0.11739      |  |  |  | 1.14307  | -4.72757     | -0.1174      |
| 15 | C | -3.03267     | 2.937404 | -0.0168      |  |  |  | 3.032673 | -2.9374      | 0.01679<br>6 |
| 16 | H | -3.49892     | 3.914555 | -0.06178     |  |  |  | 3.498916 | -3.91456     | 0.06178<br>1 |
| 17 | C | -3.68691     | -1.68118 | 0.06587<br>8 |  |  |  | 3.686913 | 1.68117<br>5 | -0.06587     |
| 18 | C | -5.17172     | -1.52732 | 0.22616<br>9 |  |  |  | 5.171724 | 1.52732<br>1 | -0.22616     |
| 19 | H | -5.43144     | -0.92687 | 1.10227<br>4 |  |  |  | 5.431443 | 0.92686<br>8 | -1.10226     |
| 20 | H | -5.61813     | -2.51633 | 0.36241<br>1 |  |  |  | 5.618132 | 2.51632<br>5 | -0.3624      |
| 21 | H | -5.64886     | -1.07064 | -0.6445      |  |  |  | 5.648863 | 1.07064      | 0.64450<br>5 |
| 22 | C | -5.15698     | 1.597601 | -0.23078     |  |  |  | 5.156975 | -1.5976      | 0.23079<br>1 |
| 23 | H | -5.42396     | 1.004225 | -1.11049     |  |  |  | 5.423955 | -1.00423     | 1.1105       |
| 24 | H | -5.59051     | 2.59283  | -0.36528     |  |  |  | 5.59051  | -2.59283     | 0.36528<br>5 |
| 25 | H | -5.64602     | 1.144683 | 0.63596<br>6 |  |  |  | 5.64602  | -1.14468     | -0.63595     |

**Table S6:** Coordinates of optimized geometry of **1b**

| Label | Symbo | X            | Y            | Z            | Label | Symbo | X        | Y            | Z            |
|-------|-------|--------------|--------------|--------------|-------|-------|----------|--------------|--------------|
| 1     | N     | 1.36813<br>1 | 1.34953<br>8 | -0.02808     | 32    | C     | 5.139157 | -1.43251     | -0.57592     |
| 2     | N     | 1.43382<br>7 | -1.39654     | -0.06342     | 33    | H     | 5.646973 | -1.15562     | 0.35417<br>3 |
| 3     | N     | -1.36813     | -1.34955     | -0.02814     | 34    | H     | 5.252594 | -0.57583     | -1.24887     |
| 4     | N     | -1.43384     | 1.39653<br>3 | -0.06335     | 35    | C     | -0.69996 | 3.76756<br>1 | -0.17504     |
| 5     | C     | -3.64397     | -1.70302     | 0.35496      | 36    | H     | -1.1387  | 4.75791      | -0.2698      |
| 6     | C     | 1.60355<br>1 | 2.68143<br>2 | 0.11360<br>9 | 37    | C     | 3.057045 | -2.89968     | -0.38972     |
| 7     | C     | 2.57755<br>3 | 0.72391<br>4 | 0.06979<br>8 | 38    | H     | 3.536624 | -3.85174     | -0.56748     |
| 8     | C     | 3.64396<br>9 | 1.70298<br>6 | 0.35502<br>4 | 39    | C     | -2.61702 | 0.69259<br>7 | -0.08498     |
| 9     | C     | 2.61701<br>9 | -0.69261     | -0.08494     | 40    | C     | -5.87119 | 2.63601<br>4 | -1.18421     |
| 10    | C     | -5.09408     | -1.48856     | 0.70866      | 41    | H     | -5.86431 | 3.49877<br>5 | -0.50984     |
| 11    | H     | -5.66638     | -1.199       | -0.17969     | 42    | H     | -6.9177  | 2.37898<br>8 | -1.37664     |
| 12    | H     | -5.17267     | -0.6456      | 1.40515<br>5 | 43    | H     | -5.41934 | 2.94349<br>4 | -2.13311     |
|       |       |              |              |              | 44    | C     | -3.67069 | 1.66358      | -0.32122     |

|    |   |               |              |              |    |   |          |              |              |
|----|---|---------------|--------------|--------------|----|---|----------|--------------|--------------|
| 13 | C | 1.65263<br>7  | -2.73504     | -0.22028     |    |   |          | 5            |              |
| 14 | C | -3.00869      | -2.91412     | 0.36068<br>5 | 45 | C | -3.05701 | 2.89965<br>1 | -0.38995     |
| 15 | H | -3.44942      | -3.88361     | 0.55176<br>8 | 46 | H | -3.53656 | 3.85170<br>1 | -0.56784     |
| 16 | C | -1.60356      | -2.68147     | 0.11340<br>8 | 47 | C | 5.775971 | 2.71021<br>5 | 1.33936<br>3 |
| 17 | C | -2.57755      | -0.72395     | 0.06966<br>7 | 48 | H | 5.800511 | 3.55981<br>6 | 0.64895<br>3 |
| 18 | C | 0.69999       | -3.76759     | -0.17495     | 49 | H | 6.811317 | 2.46998<br>6 | 1.60260<br>4 |
| 19 | H | 1.13875<br>1  | -4.75794     | -0.26956     | 50 | H | 5.260216 | 3.02996<br>6 | 2.25081<br>4 |
| 20 | C | -1.65263<br>7 | 2.73501<br>7 | -0.22036     | 51 | C | -5.13919 | 1.43256<br>3 | -0.57582     |
| 21 | C | 3.67069<br>5  | -1.66361     | -0.32114     | 52 | H | -5.64691 | 1.15575<br>8 | 0.35435<br>3 |
| 22 | C | -0.67686      | -3.74105     | 0.00957<br>1 | 53 | H | -5.25279 | 0.57584<br>1 | -1.24868     |
| 23 | H | -1.13989      | -4.72335     | 0.07567<br>6 | 54 | C | 5.094083 | 1.48857<br>2 | 0.70875<br>4 |
| 24 | C | 3.00866<br>9  | 2.91408<br>5 | 0.36088<br>6 | 55 | H | 5.666398 | 1.19874<br>6 | -0.17949     |
| 25 | H | 3.44944<br>9  | 3.88355      | 0.55194<br>6 | 56 | H | 5.172611 | 0.64575<br>6 | 1.40545<br>6 |
| 26 | C | 5.87111<br>4  | -2.636       | -1.1843      | 57 | C | -5.7759  | -2.71007     | 1.33966<br>1 |
| 27 | H | 5.86469<br>2  | -3.49855     | -0.50965     | 58 | H | -5.80019 | -3.55998     | 0.64963<br>4 |
| 28 | H | 6.91748<br>7  | -2.37885     | -1.37729     | 59 | H | -6.81134 | -2.4699      | 1.60260<br>7 |
| 29 | H | 5.41886<br>5  | -2.94384     | -2.13289     | 60 | H | -5.26021 | -3.0293      | 2.25132<br>4 |
| 30 | C | 0.67686       | 3.74102<br>5 | 0.00966<br>4 | 61 | H | -0.47798 | 1.01352<br>8 | 0.00310<br>6 |
| 31 | H | 1.13988       | 4.72332<br>9 | 0.07572<br>9 | 62 | H | 0.477972 | -1.01354     | 0.00310<br>7 |

**Table S7:** Coordinates of optimized geometry of **1c**.

| Label | Symbol | X            | Y            | Z            | Label | Symbol | X        | Y            | Z            |
|-------|--------|--------------|--------------|--------------|-------|--------|----------|--------------|--------------|
| 1     | N      | 1.43371<br>1 | 1.36394<br>8 | 0.33417<br>3 | 38    | N      | -1.37932 | 1.30365<br>1 | 0.35254<br>4 |
| 2     | N      | 1.37937<br>1 | -1.30366     | -0.35258     | 39    | C      | -5.12014 | 1.57527<br>2 | -0.26633     |
| 3     | C      | 5.12012<br>5 | -1.57525     | 0.26661<br>6 | 40    | H      | -5.68239 | 1.09048<br>3 | 0.54094<br>9 |
| 4     | H      | 5.68248<br>7 | -1.09061     | -0.54067     | 41    | H      | -5.20429 | 0.90784<br>3 | -1.13278     |
| 5     | H      | 5.20418<br>7 | -0.90769     | 1.13297<br>7 | 42    | C      | -3.05004 | -2.90954     | -0.38397     |
| 6     | C      | 3.05009      | 2.90955<br>7 | 0.38380<br>3 | 43    | H      | -3.52183 | -3.87994     | -0.44194     |
| 7     | H      | 3.52188      | 3.87995      | 0.4417       | 44    | C      | -3.66468 | -1.70494     | -0.10137     |
|       |        |              |              |              | 45    | C      | -5.12198 | -1.56194     | 0.26003<br>6 |

|    |   |              |              |              |  |  |  |  |  |
|----|---|--------------|--------------|--------------|--|--|--|--|--|
|    |   |              | 8            |              |  |  |  |  |  |
| 8  | C | 3.66471<br>6 | 1.70494<br>2 | 0.10121<br>8 |  |  |  |  |  |
| 9  | C | 5.12198<br>6 | 1.56191<br>8 | -0.26028     |  |  |  |  |  |
| 10 | H | 5.67424      | 1.08530<br>1 | 0.55809<br>5 |  |  |  |  |  |
| 11 | H | 5.21082<br>8 | 0.88524<br>4 | -1.1178      |  |  |  |  |  |
| 12 | C | 1.64876<br>8 | 2.69956<br>3 | 0.52140<br>7 |  |  |  |  |  |
| 13 | C | 5.82945<br>4 | 2.88126<br>9 | -0.6077      |  |  |  |  |  |
| 14 | H | 5.28438<br>5 | 3.38784<br>2 | -1.41414     |  |  |  |  |  |
| 15 | H | 5.80404      | 3.55552<br>7 | 0.25767<br>5 |  |  |  |  |  |
| 16 | C | 7.28719<br>6 | 2.66303<br>3 | -1.02894     |  |  |  |  |  |
| 17 | H | 7.35347<br>8 | 2.02371<br>7 | -1.91717     |  |  |  |  |  |
| 18 | H | 7.86554      | 2.18318<br>9 | -0.23049     |  |  |  |  |  |
| 19 | H | 7.77618<br>3 | 3.61340<br>7 | -1.26736     |  |  |  |  |  |
| 20 | C | 7.28132      | -2.68936     | 1.03433<br>2 |  |  |  |  |  |
| 21 | H | 7.86492<br>3 | -2.20593     | 0.24173<br>6 |  |  |  |  |  |
| 22 | H | 7.76617<br>1 | -3.6432      | 1.26783<br>4 |  |  |  |  |  |
| 23 | H | 7.34689<br>8 | -2.05679     | 1.92762<br>7 |  |  |  |  |  |
| 24 | C | -0.69111     | -3.70033     | -0.76011     |  |  |  |  |  |
| 25 | H | -1.13262     | -4.679       | -0.93196     |  |  |  |  |  |
| 26 | C | 2.61695<br>8 | 0.69939<br>5 | 0.09709<br>7 |  |  |  |  |  |
| 27 | C | 3.03958<br>4 | -2.89681     | -0.38791     |  |  |  |  |  |
| 28 | H | 3.48826<br>4 | -3.87988     | -0.43924     |  |  |  |  |  |
| 29 | C | 2.58680<br>4 | -0.70823     | -0.1238      |  |  |  |  |  |
| 30 | C | 3.66664<br>7 | -1.71413     | -0.10913     |  |  |  |  |  |
| 31 | C | 0.69721<br>4 | -3.66646     | -0.76045     |  |  |  |  |  |
| 32 | H | 1.16867<br>1 | -4.63216     | -0.93013     |  |  |  |  |  |
| 33 | C | 5.82424<br>5 | -2.8985      | 0.60594<br>7 |  |  |  |  |  |
| 34 | H | 5.27398<br>6 | -3.40988     | 1.40566<br>6 |  |  |  |  |  |
| 35 | H | 5.79778      | -3.56482     | -0.26544     |  |  |  |  |  |
| 46 | H | -5.67415     | -1.08516     | -0.55831     |  |  |  |  |  |
| 47 | H | -5.21088     | -0.88542     | 1.11765<br>8 |  |  |  |  |  |
| 48 | C | -1.64871     | -2.69954     | -0.5215      |  |  |  |  |  |
| 49 | C | -5.82953     | -2.88133     | 0.60716      |  |  |  |  |  |
| 50 | H | -5.28456     | -3.38806     | 1.41356<br>1 |  |  |  |  |  |
| 51 | H | -5.80406     | -3.55544     | -0.25833     |  |  |  |  |  |
| 52 | C | -7.2873      | -2.6631      | 1.02830<br>4 |  |  |  |  |  |
| 53 | H | -7.35364     | -2.02393     | 1.91662<br>3 |  |  |  |  |  |
| 54 | H | -7.86556     | -2.18312     | 0.22987<br>7 |  |  |  |  |  |
| 55 | H | -7.77634     | -3.6135      | 1.26652<br>9 |  |  |  |  |  |
| 56 | C | -7.28147     | 2.68942<br>9 | -1.03358     |  |  |  |  |  |
| 57 | H | -7.86496     | 2.20588<br>1 | -0.24097     |  |  |  |  |  |
| 58 | H | -7.76637     | 3.64328<br>9 | -1.2669      |  |  |  |  |  |
| 59 | H | -7.34715     | 2.05697<br>3 | -1.92695     |  |  |  |  |  |
| 60 | C | 0.69117      | 3.70034<br>2 | 0.76003<br>7 |  |  |  |  |  |
| 61 | H | 1.13267<br>4 | 4.67902<br>2 | 0.93185<br>3 |  |  |  |  |  |
| 62 | C | -2.61692     | -0.69939     | -0.09714     |  |  |  |  |  |
| 63 | C | -3.03954     | 2.89678<br>9 | 0.38804      |  |  |  |  |  |
| 64 | H | -3.48822     | 3.87985<br>5 | 0.43945<br>7 |  |  |  |  |  |
| 65 | C | -2.58677     | 0.70822<br>9 | 0.12380<br>5 |  |  |  |  |  |
| 66 | C | -3.66662     | 1.71412<br>5 | 0.10925<br>7 |  |  |  |  |  |
| 67 | C | -0.69715     | 3.66645<br>1 | 0.76045<br>2 |  |  |  |  |  |
| 68 | H | -1.16862     | 4.63213<br>8 | 0.93016<br>3 |  |  |  |  |  |
| 69 | C | -5.82434     | 2.89855<br>2 | -0.60536     |  |  |  |  |  |
| 70 | H | -5.27421     | 3.41007<br>1 | -1.40508     |  |  |  |  |  |
| 71 | H | -5.79778     | 3.56473<br>9 | 0.26612<br>2 |  |  |  |  |  |
| 72 | C | -1.62575     | 2.62983<br>9 | 0.52608<br>3 |  |  |  |  |  |
| 73 | H | -0.48306     | -0.96357     | -0.35323     |  |  |  |  |  |
| 74 | H | 0.48311<br>1 | 0.96358<br>1 | 0.35324<br>2 |  |  |  |  |  |

|    |   |              |          |          |  |
|----|---|--------------|----------|----------|--|
|    |   | 3            |          |          |  |
| 36 | C | 1.62580<br>3 | -2.62986 | -0.52605 |  |
| 37 | N | -1.43366     | -1.36394 | -0.33418 |  |

**Table S8:** Coordinates of optimized geometry of **1a-2TFA**:

| Label | Symbol | X                   | Y            | Z                    | Label | Symbol | X            | Y            | Z                    |
|-------|--------|---------------------|--------------|----------------------|-------|--------|--------------|--------------|----------------------|
| 1     | N      | 0.62303<br>2        | -1.30977     | -1.3166<br>1.35869   | 34    | C      | 0.35653<br>3 | 1.74839<br>9 | -2.69318<br>3.67877  |
| 2     | N      | -0.0955             | -1.45975     | 4<br>0.96390         | 35    | C      | -0.70181     | -0.81448     | 1<br>4.64627         |
| 3     | H      | -0.23796<br>0.39474 | -0.52491     | 7<br>0.66268         | 36    | H      | -0.85638     | -1.28517     | 4<br>1.75021         |
| 4     | C      | 3<br>0.67845        | -2.5395      | -0.74152<br>-2.67056 | 37    | C      | -0.3141      | 4<br>0.56984 | 5<br>3.66666         |
| 5     | C      | 9<br>0.19232        | -1.51838     | -2.67056<br>0.66268  | 38    | C      | -0.83283     | 6<br>1.00909 | 3<br>4.64499         |
| 6     | C      | 3<br>-2.60997       | -2.60997     | 7<br>2.84659         | 39    | H      | -1.01491     | 6<br>2.93474 | 9<br>2.93313         |
| 7     | C      | -0.12163            | -3.12688     | 5<br>3.79504         | 40    | C      | -0.5308      | 1<br>3.36988 | 4<br>3.92483         |
| 8     | H      | -0.17686            | -3.64516     | 2<br>2.67571         | 41    | H      | -0.50535     | 9<br>3.70683 | 8<br>-1.6462         |
| 9     | C      | -0.33463            | -1.72731     | 6<br>0.70645         | 42    | C      | -0.19359     | 4<br>5.13898 | -1.6462<br>-1.47605  |
| 10    | C      | 2<br>0.85753        | 0.83174<br>3 | -3.7007<br>1.30204   | 43    | C      | -0.60999     | 2<br>5.75223 | -1.47605<br>-1.01465 |
| 11    | H      | 5<br>0.31195        | 1.30204<br>8 | -4.66897<br>-1.76683 | 44    | H      | 0.16893<br>1 | 8<br>5.57046 | -1.01465<br>-2.45681 |
| 12    | C      | 3<br>-3.57522       | -3.57522     | -1.76683<br>-3.69213 | 45    | H      | -0.82776     | 7<br>5.22908 | -2.45681<br>-0.86651 |
| 13    | C      | 0.81927<br>0.99121  | -0.55359     | -3.69213<br>-4.67192 | 46    | H      | -1.51346     | 8<br>5.04235 | -0.86651<br>1.64711  |
| 14    | H      | 9<br>0.51297        | -0.99356     | -4.67192<br>-2.95373 | 47    | C      | 0.05628<br>7 | 6<br>5.65433 | 4<br>1.21998         |
| 15    | C      | 7<br>0.48111        | -2.9184      | -2.95373<br>-3.94406 | 48    | H      | -0.74324     | 6<br>5.43400 | 1.21998<br>2.64539   |
| 16    | H      | 4<br>0.21208        | -3.35628     | -3.94406<br>1.63045  | 49    | H      | 0.26980<br>8 | 4<br>5.18754 | 2<br>1.03691         |
| 17    | C      | 9<br>0.62137        | -3.68702     | 4<br>1.46020         | 50    | H      | 0.95284<br>3 | 4<br>0.29902 | 5<br>0.04328         |
| 18    | C      | 2<br>-5.12118       | -5.12118     | 6<br>1.00172         | 51    | C      | 3.61230<br>8 | 4<br>1.26729 | 5<br>0.29240         |
| 19    | H      | -0.16182            | -5.73111     | 1<br>2.44094         | 52    | O      | 2.93355<br>5 | 3<br>3.23972 | 7<br>-0.52313        |
| 20    | H      | 8<br>0.83918        | -5.55268     | 1<br>0.84870         | 53    | O      | 4<br>2.25962 | -0.83377     | -0.52313<br>-0.75596 |
| 21    | H      | 6<br>1.52297        | -5.21661     | 7<br>-1.66004        | 54    | H      | 6<br>-3.68   | -0.84179     | -0.75596<br>0.16675  |
| 22    | C      | -0.0476             | -5.02835     | -1.66004<br>-1.23747 | 55    | C      | -3.68        | -0.35582     | 6<br>0.46163         |
| 23    | H      | 0.75918             | -5.63391     | -1.23747             | 56    | O      | -3.17242     | -1.41207     | 0.46163              |



|    |   |           |           |          |    |   |           |          |          |
|----|---|-----------|-----------|----------|----|---|-----------|----------|----------|
|    |   | 4.934532  | 1.612456  | 9        |    |   |           |          | 8        |
| 12 | H | -5.665349 | -0.122344 | 1.192444 | 51 | C | -5.142174 | 0.400116 | 1.443656 |
| 13 | C | 1.672274  | 0.155071  | 2.736484 | 52 | H | -5.231163 | 1.076986 | 0.587765 |
| 14 | C | -2.97333  | 0.238248  | 2.927195 | 53 | H | -5.681152 | 0.513271 | 1.167009 |
| 15 | H | -3.386692 | 0.480992  | 3.896828 | 54 | C | 4.973656  | 0.921789 | 1.481662 |
| 16 | C | -1.609278 | 0.156762  | 2.696593 | 55 | H | 5.665204  | 0.122163 | 1.191749 |
| 17 | C | -2.5798   | 0.023789  | 0.729647 | 56 | H | 4.93456   | 1.612637 | -0.63178 |
| 18 | C | 0.719902  | 0.286089  | 3.763004 | 57 | C | -5.562372 | 1.657379 | 2.692835 |
| 19 | H | 1.168054  | 0.350904  | 4.751274 | 58 | H | -4.918583 | 2.484664 | 3.008617 |
| 20 | C | -1.672293 | 0.154996  | 2.736307 | 59 | H | -6.544403 | 2.070243 | 2.441045 |
| 21 | C | 3.683126  | 0.093036  | 1.671579 | 60 | H | -5.697941 | 0.985938 | 3.547273 |
| 22 | C | -0.66999  | 0.261278  | 3.745272 | 61 | H | -0.504227 | 0.205201 | 0.996412 |
| 23 | H | 1.128222  | 0.247961  | 4.731742 | 62 | H | 0.504189  | 0.205235 | 0.996621 |
| 24 | C | 2.97331   | 0.238493  | 2.926974 | 63 | C | -0.070586 | 3.564781 | 0.377534 |
| 25 | H | 3.386633  | 0.481385  | 3.896586 | 64 | O | 0.943977  | 3.001134 | 0.039041 |
| 26 | C | 5.845386  | 1.031793  | 2.65356  | 65 | O | -1.15831  | 3.038663 | 0.906192 |
| 27 | H | 5.868585  | 0.351579  | 3.511217 | 66 | H | -1.088135 | 2.036238 | 1.017683 |
| 28 | H | 6.882592  | 1.272704  | 2.400371 | 67 | C | 0.070468  | 3.564739 | 0.377907 |
| 29 | H | 5.349071  | 1.956269  | 2.966036 | 68 | O | -0.944198 | 3.001186 | 0.039566 |
| 30 | C | 0.669976  | 0.260998  | 3.745107 | 69 | O | 1.15825   | 3.038504 | 0.906335 |
| 31 | H | 1.128216  | 0.247537  | 4.731568 | 70 | H | 1.088049  | 2.036021 | 1.017696 |
| 32 | C | 5.142157  | -         | 1.44392  |    |   |           |          |          |

|    |   |          |              |              |  |    |   |           |              |              |
|----|---|----------|--------------|--------------|--|----|---|-----------|--------------|--------------|
|    |   |          | 0.40021<br>6 | 6            |  |    |   |           |              |              |
| 33 | H | 5.681121 | 0.51314<br>2 | 1.16715<br>9 |  | 71 | C | -0.243398 | 5.10082<br>8 | 0.22002<br>4 |
|    |   |          | -            |              |  |    |   |           | -            | -            |
| 34 | H | 5.23113  | 1.07722<br>5 | 0.58814<br>6 |  | 72 | C | 0.243361  | 5.10078<br>4 | 0.22047<br>4 |
|    |   |          | -            |              |  |    |   |           | 5.65904<br>2 | -            |
| 35 | C | 0.719915 | 0.28586<br>9 | 3.76284<br>4 |  | 73 | F | 0.862617  | 5.65904<br>2 | 0.29161<br>9 |
|    |   |          | -            |              |  |    |   |           | 5.38397<br>5 | -            |
| 36 | H | 1.168065 | 0.35060<br>8 | -4.75112     |  | 74 | F | -1.275895 | 5.68493<br>4 | 0.60631<br>2 |
|    |   |          | 0.02872<br>7 | 2.91003<br>9 |  | 75 | F | -0.493946 | 5.68493<br>4 | 1.41265      |
| 37 | C | 3.082016 | -            |              |  |    |   |           | -            | -            |
|    |   |          | 0.01895<br>5 | 3.87376<br>4 |  | 76 | F | -0.862742 | 5.65913<br>4 | 0.29082<br>9 |
| 38 | H | 3.568994 | -            |              |  |    |   |           | -            | -            |
|    |   |          | 0.01365<br>7 | 0.69122<br>6 |  | 77 | F | 0.49428   | 5.68476<br>9 | 1.41307<br>1 |
| 39 | C | 2.619579 | -            |              |  |    |   |           | -            | -            |
|    |   |          |              |              |  | 78 | F | 1.275666  | 5.38391<br>4 | 0.60612<br>9 |

**Table S10:** Coordinates of optimized geometry of **1c-2TFA**:

| Label | Symbol | X        | Y            | Z            | Label | Symbol | X        | Y            | Z            |
|-------|--------|----------|--------------|--------------|-------|--------|----------|--------------|--------------|
| 1     | N      | 1.319269 | 0.03206<br>5 | -1.39277     | 46    | H      | -5.76775 | -0.73279     | 1.31570<br>9 |
| 2     | N      | 1.290457 | -0.04477     | 1.38762<br>6 | 47    | H      | -5.40155 | 0.75152<br>5 | 0.46002<br>5 |
| 3     | C      | 4.781217 | 1.43123<br>1 | 1.32020<br>5 | 48    | C      | -1.77907 | 0.07829<br>4 | 2.75981      |
| 4     | H      | 5.539676 | 0.64766<br>5 | 1.19795<br>3 | 49    | C      | -6.01228 | 1.04341<br>1 | 2.50477<br>5 |
| 5     | H      | 4.714853 | 1.94213<br>8 | 0.35248<br>9 | 50    | H      | -5.51022 | 2.00824<br>1 | 2.64806<br>8 |
| 6     | C      | 2.970185 | -0.16143     | -2.88939     | 51    | H      | -5.95186 | 0.51422      | 3.46389<br>9 |
| 7     | H      | 3.462887 | -0.32217     | -3.83791     | 52    | C      | -7.48588 | 1.27330<br>5 | 2.15132<br>2 |
| 8     | C      | 3.569614 | -0.08994     | -1.64612     | 53    | H      | -7.5865  | 1.83530<br>3 | 1.21548<br>9 |
| 9     | C      | 5.032201 | -0.32368     | -1.36584     | 54    | H      | -8.01985 | 0.32357<br>2 | 2.02858<br>9 |
| 10    | H      | 5.559733 | 0.63407<br>5 | -1.27218     | 55    | H      | -7.99571 | 1.84176<br>5 | 2.93595<br>7 |
| 11    | H      | 5.127603 | -0.8244      | -0.39678     | 56    | C      | -6.84049 | -3.06933     | -1.98686     |
| 12    | C      | 1.55437  | -0.07741     | -2.73275     | 57    | H      | -7.62751 | -2.32032     | -1.83867     |
| 13    | C      | 5.751864 | -1.17224     | -2.42783     | 58    | H      | -7.18438 | -3.76274     | -2.76131     |
| 14    | H      | 5.214908 | -2.11988     | -2.55686     | 59    | H      | -6.741   | -3.63677     | -1.05407     |
| 15    | H      | 5.722183 | -0.6591      | -3.39736     | 60    | C      | 0.598628 | -0.13744     | -3.76288     |
| 16    | C      | 7.21131  | -1.45191     | -2.05253     |       |        |          |              |              |
| 17    | H      | 7.277816 | -2.00001     | -1.10566     |       |        |          |              |              |



|    |   |          |              |              |    |   |          |              |              |
|----|---|----------|--------------|--------------|----|---|----------|--------------|--------------|
| 18 | H | 7.780828 | -0.52151     | -1.94074     | 61 | H | 1.043416 | -0.1753      | -4.75398     |
| 19 | H | 7.707386 | -2.05454     | -2.82041     | 62 | C | -2.73075 | -0.07433     | 0.71341<br>9 |
| 20 | C | 6.615363 | 3.08062<br>8 | 1.96337<br>7 | 63 | C | -3.0554  | -0.78944     | -2.84742     |
| 21 | H | 7.401903 | 2.32862<br>7 | 1.82819<br>8 | 64 | H | -3.4497  | -1.17187     | -3.77926     |
| 22 | H | 6.959982 | 3.78780<br>2 | 2.72505<br>5 | 65 | C | -2.6877  | -0.23907     | -0.69954     |
| 23 | H | 6.515211 | 3.63113<br>3 | 1.02060<br>6 | 66 | C | -3.67164 | -0.80299     | -1.62008     |
| 24 | C | -0.82165 | 0.14990<br>7 | 3.78744<br>6 | 67 | C | -0.78732 | -0.24528     | -3.73295     |
| 25 | H | -1.26579 | 0.18090<br>5 | 4.77912<br>2 | 68 | H | -1.24223 | -0.40793     | -4.70759     |
| 26 | C | 2.497953 | 0.07886<br>5 | -0.68685     | 69 | C | -5.51266 | -2.41348     | -2.38216     |
| 27 | C | 2.832024 | 0.80894<br>1 | 2.86485<br>7 | 70 | H | -4.75372 | -3.18741     | -2.55133     |
| 28 | H | 3.229147 | 1.19397<br>3 | 3.79439<br>6 | 71 | H | -5.64118 | -1.88803     | -3.33675     |
| 29 | C | 2.454274 | 0.25214<br>8 | 0.72126<br>8 | 72 | C | -1.72137 | -0.28174     | -2.67419     |
| 30 | C | 3.444394 | 0.81411<br>6 | 1.63736      | 73 | H | -0.602   | -0.06965     | 1.03023<br>3 |
| 31 | C | 0.563535 | 0.26888<br>4 | 3.75690<br>6 | 74 | H | 0.376104 | 0.15470<br>3 | -1.01434     |
| 32 | H | 1.018455 | 0.43638<br>3 | 4.73063<br>3 | 75 | C | -0.4685  | 3.50192<br>6 | -0.8413      |
| 33 | C | 5.287321 | 2.43272<br>4 | 2.37082<br>6 | 76 | O | 0.575701 | 3.06468<br>8 | -0.41751     |
| 34 | H | 4.52858  | 3.20973<br>4 | 2.52564<br>7 | 77 | O | -1.50964 | 2.82862<br>2 | -1.29287     |
| 35 | H | 5.416114 | 1.92396<br>5 | 3.33447<br>5 | 78 | H | -1.36181 | 1.83042<br>5 | -1.26122     |
| 36 | C | 1.494751 | 0.30381<br>6 | 2.69693<br>1 | 79 | C | -0.7426  | 5.02885<br>9 | -0.92441     |
| 37 | N | -1.549   | -0.01376     | 1.41612<br>2 | 80 | F | -0.91681 | 5.41292<br>2 | -2.20908     |
| 38 | N | -1.52221 | 0.06663<br>6 | -1.36305     | 81 | F | -1.85831 | 5.35967<br>9 | -0.23701     |
| 39 | C | -5.00759 | -1.43002     | -1.31401     | 82 | F | 0.281086 | 5.72877<br>4 | -0.41653     |
| 40 | H | -5.77029 | -0.6531      | -1.17655     | 83 | C | 1.604417 | -3.50587     | 0.89524<br>6 |
| 41 | H | -4.94088 | -1.95879     | -0.35576     | 84 | O | 2.776638 | -3.24379     | 0.75361<br>7 |
| 42 | C | -3.19397 | 0.12699<br>7 | 2.92303<br>8 | 85 | O | 0.605486 | -2.67887     | 1.13281<br>5 |
| 43 | H | -3.68592 | 0.25745<br>4 | 3.87657<br>9 | 86 | H | 0.915902 | -1.71391     | 1.20264<br>3 |
| 44 | C | -3.79908 | 0.05525<br>6 | 1.68111<br>4 | 87 | C | 1.078828 | -4.96585     | 0.80859<br>9 |
| 45 | C | -5.27299 | 0.24102<br>3 | 1.42048<br>8 | 88 | F | 0.161704 | -5.08981     | -0.17769     |
|    |   |          |              |              | 89 | F | 0.491463 | -5.3356      | 1.96907<br>2 |
|    |   |          |              |              | 90 | F | 2.076883 | -5.82411     | 0.55673<br>7 |

## 6. FLUORESCENCE LIFETIME AND DECAY PROFILES

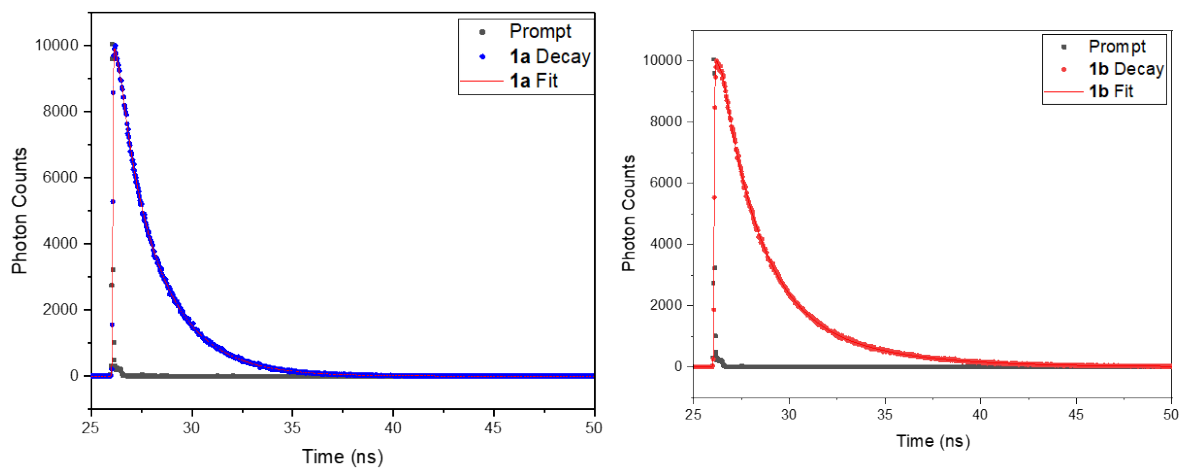

**Figure S60.** Fluorescence decay profiles of **1a** and **1b**.

**Table S11:** Average fluorescence lifetime ( $\tau_{\text{avg}}$ ) of porphycenes in toluene at 25 °C.

| Compounds | Average Lifetime calculation ( $\tau$ in "ns") |          |                     |          |
|-----------|------------------------------------------------|----------|---------------------|----------|
|           | $\tau_1$                                       | $\tau_2$ | $\tau_{\text{avg}}$ | $\chi^2$ |
| <b>1a</b> | 1.83                                           | 4.57     | 2.58                | 1.073627 |
| <b>1b</b> | 0.66                                           | 2.15     | 1.87                | 0.966259 |

## 7. SINGLET OXYGEN LUMINESCENCE SPECTRAL DATA

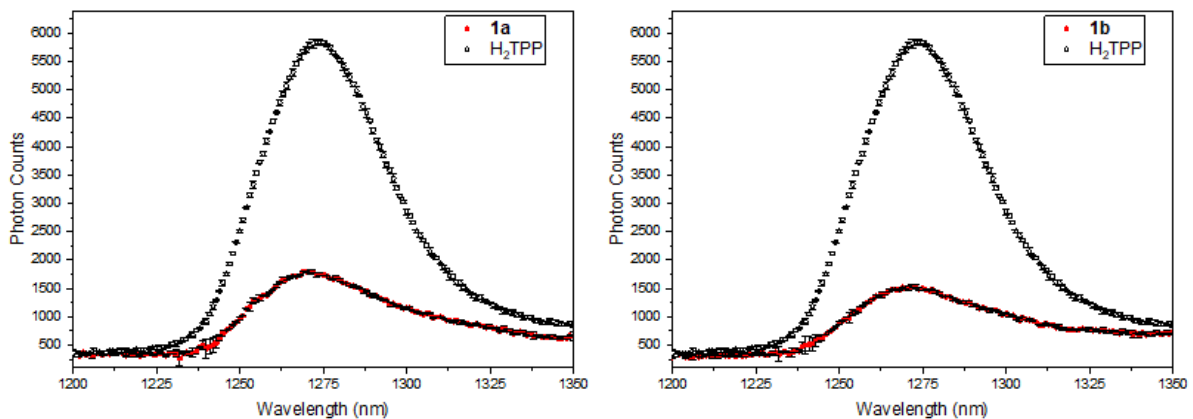

**Figure S61.** Singlet oxygen luminescence of optically matched H<sub>2</sub>TPP with **1a** and **1b** in aerated toluene.

**Table S12:** Singlet oxygen Quantum yield of **1a** & **1b**.

| Comp      | Singlet oxygen Quantum yield ( $\Phi_{\Delta}$ ) |
|-----------|--------------------------------------------------|
| <b>1a</b> | <b>0.22</b>                                      |
| <b>1b</b> | <b>0.18</b>                                      |

## 8. CYCLIC VOLTAMMOGRAMS

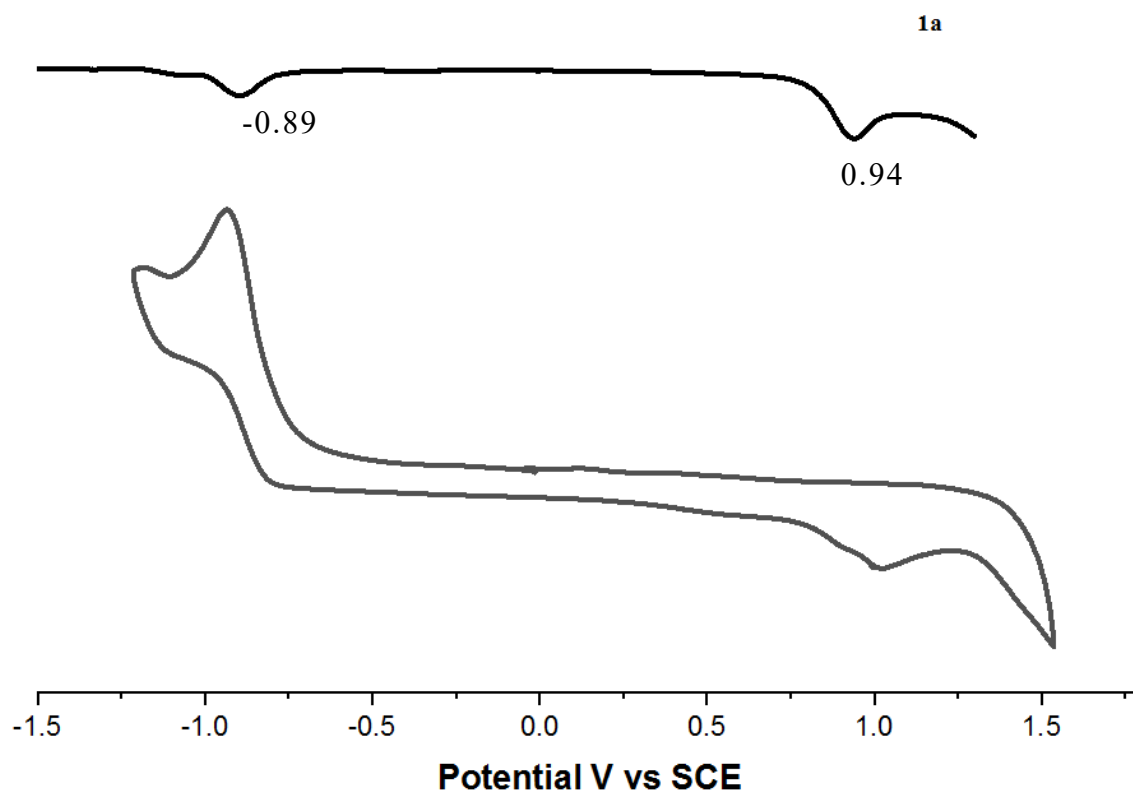

**Figure S62.** Cyclic voltammograms of **1a** in dichloromethane at 25 °C (scan rate 50 V/s).

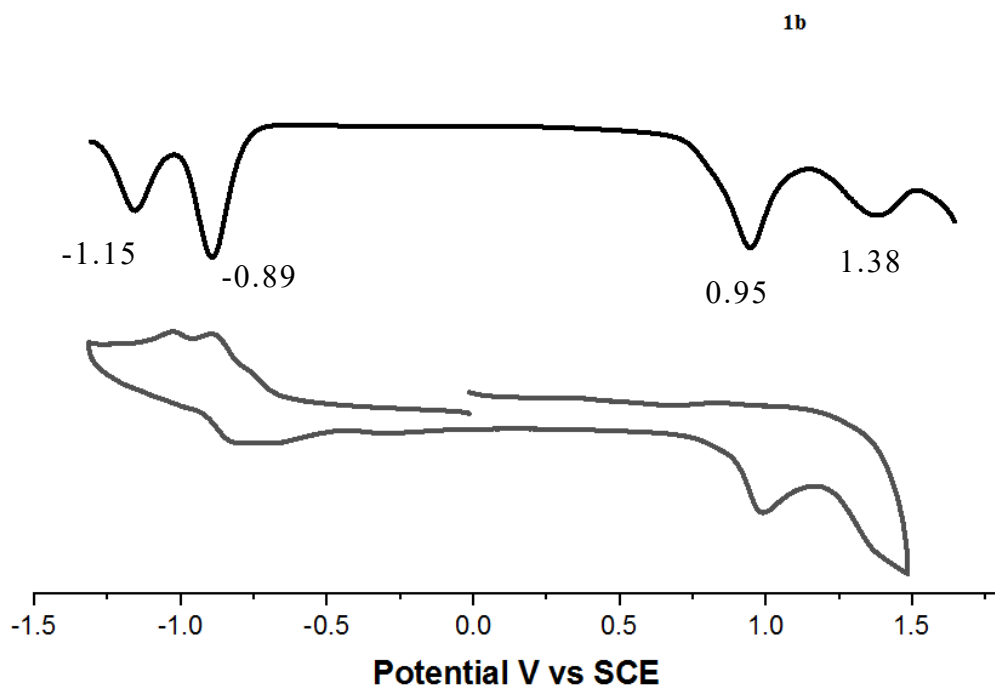

**Figure S63.** Combined CV (below) and DPV (above) of **1b** in dichloromethane measured at 25 °C.
